# Supplementary material
Source: PubMed Central journal article supplement (PMC4187676)
Supplement: JB.01922-14_zjb999093312so1.pdf [file JB.01922-14_zjb999093312so1.pdf]

## Supplemental Figure 1: Alignment of HetN-like proteins

|                                        |   |            |            |            |            |                |
|----------------------------------------|---|------------|------------|------------|------------|----------------|
| MAST-10914-SCAD-B                      | 0 | -----      | -----      | -----      | -----      | -----          |
| Cal-6303.p-Cal-6303-1520 (5.0d-28)     | 0 | -----      | -----      | -----      | -----      | -----          |
| Npun.p-NpF2349 (4.0d-29)               | 0 | -----      | -----      | -----      | -----      | -----          |
| N-7107.p-N-7107-0937 (1.0d-27)         | 0 | -----      | -----      | -----      | -----      | -----          |
| Ana-90.p-ana90-1712 (1.0d-28)          | 0 | -----      | -----      | -----      | -----      | -----          |
| Acyl-7122.p-acyl-4545 (9.0d-28)        | 0 | -----      | -----      | -----      | -----      | -----          |
| Nsp-0708.p-Nsp-0708-2353 (9.0d-27)     | 0 | -----      | -----      | -----      | -----      | -----          |
| Cyl-505.p-Cyl-505-0204 (2.0d-28)       | 0 | -----      | -----      | -----      | -----      | -----          |
| Cyl-7417.p-Cyl-7417-2349 (6.0d-29)     | 0 | -----      | -----      | -----      | -----      | -----          |
| R7116-SCAD-C                           | 0 | -----      | -----      | -----      | -----      | -----          |
| ter.p-Tery_3438 (2.0d-28)              | 0 | -----      | -----      | -----      | -----      | -----          |
| lyn.p-18106?21814 (1.0d-27)            | 0 | -----      | -----      | -----      | -----      | -----          |
| Amar.p-AM1_5632 (1.0d-26)              | 0 | -----      | -----      | -----      | -----      | -----          |
| cyr.p-c8801?2930 (1.0d-28)             | 0 | -----      | -----      | -----      | -----      | -----          |
| S6803.p-Slr0886 (4.0d-27)              | 0 | -----      | -----      | -----      | -----      | -----          |
| mae.p-MAE_33900 (3.0d-29)              | 0 | -----      | -----      | -----      | -----      | -----          |
| TeBP1.p-tlr1502 (5.0d-29)              | 0 | -----      | -----      | -----      | -----      | -----          |
| S7942.p-Synpcc7942_0684 (4.0d-26)      | 0 | -----      | -----      | -----      | -----      | -----          |
| syx.p-SynWH7803_1861 (7.0d-30)         | 0 | -----      | -----      | -----      | -----      | -----          |
| S7805.p-WH7805_13603 (5.0d-28)         | 0 | -----      | -----      | -----      | -----      | -----          |
| S9916.p-RS9916_33507 (8.0d-31)         | 0 | -----      | -----      | -----      | -----      | -----          |
| Ssp-RS9917.p-Ssp-RS9917-1614 (2.0d-29) | 1 | MWCWHPVNCW | WCLAARANCG | CCGICSVPPS | TWWKRWGARG | AADPCLRSRA     |
| S9917.p-RS9917_09056 (3.0d-29)         | 0 | -----      | -----      | -----      | -----      | -----          |
| syg.p-sync_2137 (4.0d-29)              | 0 | -----      | -----      | -----      | -----      | -----          |
| P9313.p-PMT1333 (6.0d-29)              | 0 | -----      | -----      | -----      | -----      | -----          |
| pmf.p-P9303_06521 (1.0d-28)            | 1 | -----      | -----      | -----      | -----      | -----MGPY      |
| S107.p-BL107_09856 (2.0d-28)           | 1 | -----      | -----      | -----      | -----      | -----LREKASDLY |
| S9902.p-Sync9902_1745 (4.0d-28)        | 0 | -----      | -----      | -----      | -----      | -----          |
| S9605.p-Sync9605_0617 (4.0d-27)        | 1 | -----      | -----      | -----      | -----      | -----MSMAPY    |
| S8102.p-SynW1852 (9.0d-28)             | 0 | -----      | -----      | -----      | -----      | -----          |
| syr.p-SynRCC307_0681 (2.0d-28)         | 0 | -----      | -----      | -----      | -----      | -----          |
| S5701.p-WH5701_07809 (1.0d-28)         | 0 | -----      | -----      | -----      | -----      | -----          |
| pmn.p-PMN2A_1785 (5.0d-28)             | 0 | -----      | -----      | -----      | -----      | -----          |
| pme.p-NATL1_05081 (1.0d-27)            | 0 | -----      | -----      | -----      | -----      | -----          |
| pmz.p-p9211?06582 (1.0d-27)            | 0 | -----      | -----      | -----      | -----      | -----          |

|                          |           |   |       |       |       |             |            |
|--------------------------|-----------|---|-------|-------|-------|-------------|------------|
| PRO1375.p-Pro0452        | (7.0d-27) | 0 | ----- | ----- | ----- | -----       | -----      |
| Gvi.p-glr3506            | (5.0d-28) | 0 | ----- | ----- | ----- | -----       | -----      |
| pmb.p-P9601_05091        | (9.0d-28) | 0 | ----- | ----- | ----- | -----       | -----      |
| pmi.p-PMT9312_0453       | (1.0d-27) | 0 | ----- | ----- | ----- | -----       | -----      |
| pmg.p-P9301_04781        | (1.0d-27) | 0 | ----- | ----- | ----- | -----       | -----      |
| PMED4.p-PMM0453          | (9.0d-28) | 0 | ----- | ----- | ----- | -----       | -----      |
| pmc.p-P9515_05161        | (2.0d-27) | 0 | ----- | ----- | ----- | -----       | -----      |
| Npun.p-NpR0578           | (6.0d-27) | 0 | ----- | ----- | ----- | -----       | -----      |
| Cyl-7417.p-Cyl-7417-0303 | (5.0d-26) | 0 | ----- | ----- | ----- | -----       | -----      |
| Npun.p-NpF2231           | (1.0d-26) | 0 | ----- | ----- | ----- | -----       | -----      |
| Cyl-7417.p-Cyl-7417-3400 | (1.0d-26) | 0 | ----- | ----- | ----- | -----       | -----      |
| Acyl-7122.p-acyl-3225    | (4.0d-28) | 0 | ----- | ----- | ----- | -----       | -----      |
| Nsp-0708.p-Nsp-0708-2459 | (6.0d-26) | 0 | ----- | ----- | ----- | -----       | -----      |
| Ana-90.p-ana90-1189      | (1.0d-28) | 0 | ----- | ----- | ----- | -----       | -----      |
| Cyl-505.p-Cyl-505-2036   | (2.0d-32) | 0 | ----- | ----- | ----- | -----       | -----      |
| A29413.p-Ava2536         | (2.0d-28) | 0 | ----- | ----- | ----- | -----       | -----      |
| A7120.p-Alr5286          | (2.0d-28) | 1 | ----- | ----- | ----- | -----       | -----MTR   |
| N-7524.p-N-7524-4179     | (1.0d-27) | 0 | ----- | ----- | ----- | -----       | -----      |
| MAST-10914-SCAD-C        |           | 0 | ----- | ----- | ----- | -----       | -----      |
| Cyl-7417.p-Cyl-7417-1063 | (4.0d-30) | 0 | ----- | ----- | ----- | -----       | -----      |
| nod.p-n9414?21215        | (5.0d-26) | 0 | ----- | ----- | ----- | -----       | -----      |
| N-7107.p-N-7107-1008     | (2.0d-29) | 0 | ----- | ----- | ----- | -----       | -----      |
| M7126-SCAD-A             |           | 0 | ----- | ----- | ----- | -----       | -----      |
| R7116-SCAD-B             |           | 0 | ----- | ----- | ----- | -----a----- | -----      |
| lyn.p-l8106?23630        | (2.0d-26) | 0 | ----- | ----- | ----- | -----       | -----      |
| Amar.p-AM1_5634          | (3.0d-27) | 0 | ----- | ----- | ----- | -----       | -----      |
| cyb.p-CYB_0189           | (1.0d-27) | 0 | ----- | ----- | ----- | -----       | -----      |
| cya.p-CYA_2793           | (8.0d-26) | 0 | ----- | ----- | ----- | -----       | -----      |
| M7126-SCAD-D             |           | 0 | ----- | ----- | ----- | -----       | -----      |
| cyb.p-CYB_0005           | (4.0d-34) | 0 | ----- | ----- | ----- | -----       | -----      |
| cya.p-CYA_0005           | (2.0d-33) | 0 | ----- | ----- | ----- | -----       | -----      |
| N-7107.p-N-7107-5182     | (3.0d-28) | 0 | ----- | ----- | ----- | -----       | -----      |
| Npun.p-NpR3707           | (3.0d-27) | 0 | ----- | ----- | ----- | -----       | -----      |
| Acyl-7122.p-acyl-1205    | (2.0d-26) | 1 | ----- | ----- | ----- | -----MLNFK  | STVTLSRYSI |
| R7116-SCAD-F             |           | 1 | ----- | ----- | ----- | -----       | -----V     |
| Npun.p-NpF0204           | (3.0d-28) | 0 | ----- | ----- | ----- | -----       | -----      |
| MAST-10914-SCAD-D        |           | 0 | ----- | ----- | ----- | -----       | -----      |
| Cal-6303.p-Cal-6303-3407 | (1.0d-27) | 0 | ----- | ----- | ----- | -----       | -----      |
| Ana-90.p-ana90-4359      | (1.0d-27) | 0 | ----- | ----- | ----- | -----       | -----      |
| Cyl-7417.p-Cyl-7417-4762 | (6.0d-27) | 0 | ----- | ----- | ----- | -----       | -----      |

|                          |            |   |       |       |        |            |            |
|--------------------------|------------|---|-------|-------|--------|------------|------------|
| Nsp-0708.p-Nsp-0708-3536 | (2.0d-26)  | 0 | ----- | ----- | -----  | -----      | -----      |
| N-7107.p-N-7107-1296     | (2.0d-26)  | 0 | ----- | ----- | -----  | -----      | -----      |
| Npun.p-NpR1019           | (4.0d-26)  | 0 | ----- | ----- | -----  | -----      | -----      |
| N-7524.p-N-7524-4265     | (1.0d-25)  | 0 | ----- | ----- | -----  | -----      | -----      |
| M7126-SCAD-E             |            | 0 | ----- | ----- | -----  | -----      | -----      |
| R7116-SCAD-E             |            | 0 | ----- | ----- | -----  | -----      | -----      |
| cyt.p-cce_3588           | (3.0d-27)  | 0 | ----- | ----- | -----  | -----      | -----      |
| ctc.p-c0110?06289        | (2.0d-26)  | 0 | ----- | ----- | -----  | -----      | -----      |
| cyr.p-c8801?0598         | (2.0d-26)  | 0 | ----- | ----- | -----  | -----      | -----      |
| Amar.p-AM1_6363          | (1.0d-30)  | 0 | ----- | ----- | -----  | -----      | -----      |
| Amar.p-AM1_0210          | (1.0d-27)  | 0 | ----- | ----- | -----  | -----      | -----      |
| lyn.p-l8106?00785        | (4.0d-31)  | 0 | ----- | ----- | -----  | -----      | -----      |
| ter.p-Tery_3453          | (8.0d-31)  | 0 | ----- | ----- | -----  | -----      | -----      |
| A29413.p-Ava0943         | (1.0d-30)  | 1 | ----- | ----- | -----  | -----      | ----MDLYSS |
| A7120.p-All2963          | (5.0d-29)  | 1 | ----- | ----- | -----  | -----      | ----MDLYSS |
| Npun.p-NpR4797           | (3.0d-30)  | 0 | ----- | ----- | -----  | -----      | -----      |
| Cyl-7417.p-Cyl-7417-4424 | (3.0d-30)  | 0 | ----- | ----- | -----  | -----      | -----      |
| MAST-10914-SCAD-E        |            | 0 | ----- | ----- | -----  | -----      | -----      |
| M7126-SCAD-C             |            | 0 | ----- | ----- | -----  | -----      | -----      |
| R7116-SCAD-D             |            | 0 | ----- | ----- | -----  | -----      | -----      |
| Npun.p-NpF0199           | (2.0d-29)  | 1 | ----- | ----- | -----M | NINYQNLPIF | TLFIIGALLS |
| A7120.p-Alr5358          | (3.0d-156) | 0 | ----- | ----- | -----  | -----      | -----      |
| A29413.p-Ava2596         | (8.0d-151) | 0 | ----- | ----- | -----  | -----      | -----      |
| N-7524.p-N-7524-5224     | (2.0d-121) | 0 | ----- | ----- | -----  | -----      | -----      |
| Cyl-7417.p-Cyl-7417-1544 | (2.0d-100) | 0 | ----- | ----- | -----  | -----      | -----      |
| MAST-10914-SCAD-A        |            | 0 | ----- | ----- | -----  | -----      | -----      |
| N-7524.p-N-7524-5355     | (2.0d-74)  | 0 | ----- | ----- | -----  | -----      | -----      |
| Npun.p-NpF3363           | (2.0d-81)  | 0 | ----- | ----- | -----  | -----      | -----      |
| R7116-SCAD-A             |            | 0 | ----- | ----- | -----  | -----      | -----      |
| cyr.p-c8801?3820         | (4.0d-26)  | 0 | ----- | ----- | -----  | -----      | -----      |
| A7120.p-All1418          | (8.0d-26)  | 0 | ----- | ----- | -----  | -----      | -----      |
| consensus                |            | 1 |       |       |        |            |            |

|                              |           |    |            |                  |            |             |             |
|------------------------------|-----------|----|------------|------------------|------------|-------------|-------------|
| A7120.p-Alr1894              | (1.0d-26) | 1  | ----MAILSE | NLR---GQVA       | VVTGASRGIG | RAIALELANY  | GATVVVNYAS  |
| A29413.p-Ava3764             | (1.0d-26) | 1  | ----MAILSE | NLR---GQVA       | VVTGASRGIG | RAIALELANY  | GATVVVNYAS  |
| N-7524.p-N-7524-0010         | (9.0d-30) | 1  | ----MAILSE | NLK---GQVA       | IVTGASRGIG | RAIALELSTY  | GATVVVNYAS  |
| M7126-SCAD-B                 |           | 1  | ----MAVLSE | NLPNLQEKVA       | IVTGASRGIG | RAIALELSQY  | GASVVVNYAS  |
| nod.p-n9414?22428            | (4.0d-28) | 1  | ----MKLLQ- | -----GQVA        | IITGASRGIG | RAIALELATQ  | GATIIIVNYAN |
| MAST-10914-SCAD-B            |           | 1  | ----MELLPD | NLQSLRGQVA       | LVTGASRGIG | RAIAQELAKQ  | GANVVVNYAS  |
| Cal-6303.p-Cal-6303-1520     | (5.0d-28) | 1  | ----MELLPE | NLQTLRGQVA       | IVTGASRGIG | RAIALELSKQ  | GATLVVNYAA  |
| Npun.p-NpF2349               | (4.0d-29) | 1  | -----      | -MTLLQGKVA       | IVTGASRGIG | KAI AIELASQ | GAI VVNYAS  |
| N-7107.p-N-7107-0937         | (1.0d-27) | 1  | ----MEVLPG | NLQSLK GKVA      | IVTGGSRGIG | KAI AIELAKY | GASVAVNYAS  |
| Ana-90.p-ana90-1712          | (1.0d-28) | 1  | -----      | -MSLLKDQVA       | IVTGASRGIG | RAIAIQLASQ  | GAKVVVNYAS  |
| Acyl-7122.p-acyl-4545        | (9.0d-28) | 1  | -----      | -MTLLKDQVA       | IVTGASRGIG | RAIALQLASQ  | GAKVVVNYAS  |
| Nsp-0708.p-Nsp-0708-2353     | (9.0d-27) | 1  | -----      | -MTLLHDQVA       | IVTGASRGIG | RAITLQLASQ  | GAKVVINYAN  |
| Cyl-505.p-Cyl-505-0204       | (2.0d-28) | 1  | -----      | -MTSVKDQVA       | IVTGASRGIG | RAIALQLAEK  | GAKIVVNYAS  |
| Cyl-7417.p-Cyl-7417-2349     | (6.0d-29) | 1  | ----MELMPE | NLQSLQNOVA       | IITGASRGIG | RAIALELATQ  | GAKVVINYAQ  |
| R7116-SCAD-C                 |           | 1  | ----MELMPE | NLQSLREQVA       | VVTGASRGIG | RAIAQELAKL  | GASVVVNYAS  |
| ter.p-Tery_3438              | (2.0d-28) | 1  | ----MEALPE | TLQRLK GKVA      | IVTGASRGIG | RATALALAME  | GANVVVNYAK  |
| lyn.p-l8106?21814            | (1.0d-27) | 1  | ----MDVLPE | TQQHLKEQVA       | IVTGASRGIG | RAIAIALASL  | GANIVVNYAS  |
| Amar.p-AM1_5632              | (1.0d-26) | 1  | -----      | -MNSLQDKVA       | IVTGASRGIG | RATALALAGE  | GAKVAINYAN  |
| cyr.p-c8801?2930             | (1.0d-28) | 1  | -----      | -MA DSQALSEQVA   | IVTGASRGIG | KAI ALALASQ | GLKVVVNYAR  |
| S6803.p-Slr0886              | (4.0d-27) | 1  | -----      | -MTALTAQVA       | LVTGASRGIG | KATALALAAAT | GMKVVVNYAQ  |
| mae.p-MAE_33900              | (3.0d-29) | 1  | ----MKLLPA | ECQHLDQKVA       | IVTGASRGIG | KAI ALELASQ | GATVVVNYAK  |
| TeBP1.p-tlr1502              | (5.0d-29) | 1  | -----      | ---MSETAVA       | IVTGASRGIG | RAIALELAKE  | GATVVVNYAR  |
| S7942.p-Synpcc7942_0684      | (4.0d-26) | 1  | -----      | -M TALPLTDRIA    | LVTGASRGIG | RAIALELAAA  | GAKVAVNYAS  |
| syx.p-SynWH7803_1861         | (7.0d-30) | 1  | -----      | -MN PTRTLDGQTA   | LVTGASRGIG | RAVALALAEK  | GAEVVNYAS   |
| S7805.p-WH7805_13603         | (5.0d-28) | 1  | -----      | -MN PTRTLDGQTA   | LVTGASRGIG | RAVALALAEK  | GAEVVNYAS   |
| S9916.p-RS9916_33507         | (8.0d-31) | 1  | -----      | -MT THASLAGQTA   | LVTGASRGIG | RAVAQALAEA  | GAEVVNYAS   |
| Ssp-RS9917.p-Ssp-RS9917-1614 | (2.0d-29) | 51 | IDHRCRAAMT | TSAPMTGQTA       | IVTGASRGIG | RCVALALADA  | GAEVVNYAR   |
| S9917.p-RS9917_09056         | (3.0d-29) | 1  | -----      | -MT TSAPMTGQTA   | IVTGASRGIG | RCVALALADA  | GAEVVNYAR   |
| syg.p-sync_2137              | (4.0d-29) | 1  | -----      | -MS SSASLDGQTA   | LVTGASRGIG | RAVALALAAE  | GAEVVNYAS   |
| P9313.p-PMT1333              | (6.0d-29) | 1  | -----      | -MT SPRPLTGQTA   | LITGASRGIG | RAVALALAEA  | GAEVVNYSS   |
| pmf.p-P9303_06521            | (1.0d-28) | 5  | DPARTNHAMT | SNPPLTGQTA       | LITGASRGIG | RAVALALAEA  | GAEVVNYSS   |
| S107.p-BL107_09856           | (2.0d-28) | 10 | DPSIFSSAMS | PTTSLAGQTA       | LVTGGGRGIG | KAI ALALGEA | GAEVVNYSS   |
| S9902.p-Syncc9902_1745       | (4.0d-28) | 1  | -----      | -MS PTTSLAGQTA   | LVTGGGRGIG | KAI ALALGEA | GAEVVNYSS   |
| S9605.p-Syncc9605_0617       | (4.0d-27) | 7  | DPAINGALMS | PSASLAGQTA       | LVTGGGRGIG | RAIALALGEA  | GAEVVNYSS   |
| S8102.p-SynW1852             | (9.0d-28) | 1  | -----      | -ML SSASLDGQTA   | LVTGGGRGIG | KAI ALALAEA | GAEVVNYAN   |
| syr.p-SynRCC307_0681         | (2.0d-28) | 1  | -----      | -MS SLAPLAGQIA   | LVTGASRGIG | RAIALQLAEA  | GAEVVNYAS   |
| S5701.p-WH5701_07809         | (1.0d-28) | 1  | -----      | -MTGS AVAPLTGQVA | LVTGASRGIG | RAIALELAAS  | GAEVVNYAA   |
| pmn.p-PMN2A_1785             | (5.0d-28) | 1  | -----      | -MT LSKLLEGQTA   | IVTGASRGIG | KAI AIFLAKE | GAEVIINYSS  |
| pme.p-NATL1_05081            | (1.0d-27) | 1  | -----      | -MT LSKLLEGQTA   | IVTGASRGIG | KAI AIFLAKE | GAEVIINYSS  |

|                                    |    |            |             |            |             |             |
|------------------------------------|----|------------|-------------|------------|-------------|-------------|
| pmz.p-p9211?06582 (1.0d-27)        | 1  | -----MT    | NQNLCCEGQTV | LVTGASRGIG | RAIALNLATT  | GAEIVVNYAN  |
| PRO1375.p-Pro0452 (7.0d-27)        | 1  | -----MT    | SSSLLIGQTA  | IVTGASRGIG | KAIALNLAQA  | GAEVVVNYAN  |
| Gvi.p-glr3506 (5.0d-28)            | 1  | -----      | MTGLLTGKVA  | LVTGAGRGIG | RACALALASE  | GAHAVVNYSR  |
| pmb.p-P9601_05091 (9.0d-28)        | 1  | -----MS    | NTDSLSGKVA  | LITGASRGIG | KEIALELSRL  | GAEVFINYSS  |
| pmi.p-PMT9312_0453 (1.0d-27)       | 1  | -----MS    | NTALLSGKVA  | LITGASRGIG | KEIALELSRL  | GAEVFINYSS  |
| pmg.p-P9301_04781 (1.0d-27)        | 1  | -----MS    | NTDSLSGKVA  | LITGASRGIG | KEIALELSRF  | GAEVFINYSS  |
| PMED4.p-PMM0453 (9.0d-28)          | 1  | -----MS    | NTESLTGKVA  | LITGASRGIG | KEIALELSNL  | GAKVIINYSS  |
| pmc.p-P9515_05161 (2.0d-27)        | 1  | -----MS    | NKESLTGKVA  | LITGASRGIG | KEIALELSNL  | GAEVIINYSS  |
| Npun.p-NpR0578 (6.0d-27)           | 1  | -----MTKN  | ENGNYTGKVA  | FVTGAANGIG | RATALAFARE  | GANVVVADVS  |
| Cyl-7417.p-Cyl-7417-0303 (5.0d-26) | 1  | -----      | MDLQLQGKRV  | LITGSTSGIG | EAIKALAKE   | GARVVV-HGR  |
| Npun.p-NpF2231 (1.0d-26)           | 1  | -----      | MSKQLENKVV  | IVTGAGKGIG | RAIALAFAVE  | GAHIVIADKS  |
| Cyl-7417.p-Cyl-7417-3400 (1.0d-26) | 1  | -----      | MSEQLIDKVA  | IVTGAGKGIG | RAIALTFASE  | GANVIIADKS  |
| Acyl-7122.p-acyl-3225 (4.0d-28)    | 1  | -----      | -MSFEQKRRA  | LITGASSGIG | KATALAFAKA  | GIDVALVSRS  |
| Nsp-0708.p-Nsp-0708-2459 (6.0d-26) | 1  | -----      | -MSFDQKRRA  | LITGASSGIG | KATALAFAKA  | GIDVALVSRS  |
| Ana-90.p-ana90-1189 (1.0d-28)      | 1  | -----      | -MNFEQKRRA  | LITGASSGIG | KATALAFAKA  | GIDVALVSRS  |
| Cyl-505.p-Cyl-505-2036 (2.0d-32)   | 1  | -----      | -MSFEKKKRA  | LITGASAGIG | KETAIAFAKE  | GIDVALVSRS  |
| A29413.p-Ava2536 (2.0d-28)         | 1  | -----      | -MSLEQKRRA  | LITGASSGIG | KATALAFAKA  | GIDVALVSRS  |
| A7120.p-Alr5286 (2.0d-28)          | 4  | ACKTAKKLGE | SMSLEQKRRA  | LITGASSGIG | KATALAFAKA  | GIDVALVSRS  |
| N-7524.p-N-7524-4179 (1.0d-27)     | 1  | -----      | -MSLEQKRRA  | LITGASSGIG | KATALAFAKA  | GIDVALVSRS  |
| MAST-10914-SCAD-C                  | 1  | -----LGD   | SMSVEQKRRA  | LITGASSGIG | KATALAFAKA  | GIDVALVSRS  |
| Cyl-7417.p-Cyl-7417-1063 (4.0d-30) | 1  | -----      | -MSVEQKRRA  | LITGASSGIG | KATALAFAKA  | GIDVALVSRS  |
| nod.p-n9414?21215 (5.0d-26)        | 1  | -----      | -MSLD-KRRA  | LITGASSGIG | KATALAFAKA  | GIDVALVSRS  |
| N-7107.p-N-7107-1008 (2.0d-29)     | 1  | -----      | -MSSKQKQNA  | LITGASSGIG | KATALAFAKA  | GIDVALVSRS  |
| M7126-SCAD-A                       | 1  | -----      | -MSVEQKQQA  | LITGASSGIG | KATALALAKA  | GINVALVSRS  |
| R7116-SCAD-B                       | 1  | -----      | --MSELKKRA  | LITGASSGIG | KQTALAFASS  | GIDVALLGRS  |
| lyn.p-l8106?23630 (2.0d-26)        | 1  | -----      | -MTSPIERRA  | LITGASSGIG | KATALAFAKA  | GIHVALVSRS  |
| Amar.p-AM1_5634 (3.0d-27)          | 1  | -----      | -MTAQRKLRA  | LITGASRGIG | RATAEFAAAS  | NIDLVLVSRS  |
| cyb.p-CYB_0189 (1.0d-27)           | 1  | -----M     | SFETKFPERA  | LITGASRGIG | RAVALALARQ  | GIAVALVARS  |
| cya.p-CYA_2793 (8.0d-26)           | 1  | -----M     | SFETQFPERA  | LITGASRGIG | KAVALLALARQ | GVAVALVARS  |
| M7126-SCAD-D                       | 1  | -----      | --MRLKNQVV  | IITGASRGLG | RATALLFGKE  | GAHIIAASRS  |
| cyb.p-CYB_0005 (4.0d-34)           | 1  | -----      | -MPSLANQVV  | LITGASAGIG | EAVALEAAKR  | GARLVLAARR  |
| cya.p-CYA_0005 (2.0d-33)           | 1  | -----      | -MLSLANQVV  | LITGASAGIG | KAVALEAAKR  | GARLVLAARR  |
| N-7107.p-N-7107-5182 (3.0d-28)     | 1  | -----      | MTIKLNGKVA  | IITGASSGIG | EATAIALAAE  | GATVAIAARR  |
| Npun.p-NpR3707 (3.0d-27)           | 1  | -----      | MTGKLKEQVA  | IITGASAGIG | EATAIALAAE  | GATVVIAARR  |
| Acyl-7122.p-acyl-1205 (2.0d-26)    | 16 | FKLINQWVFT | MAGKLDGKVA  | IITGASSGIG | KGTAIALATE  | GAKVVIAARR  |
| R7116-SCAD-F                       | 2  | WIVNYQLTSS | PMTSIQNQIV  | LITGASSGIG | ASCVKYFAEA  | GAKLVLAARR  |
| Npun.p-NpF0204 (3.0d-28)           | 1  | -----MAI   | SLKPLRNQVV  | VITGASSGIG | LVTARMAAKQ  | GAKLVLAARN  |
| MAST-10914-SCAD-D                  | 1  | -----      | --MNIQ GKTA | LVTGASRGIG | QAI AIELAKQ | GVKRLLLVAR  |
| Cal-6303.p-Cal-6303-3407 (1.0d-27) | 1  | -----      | --MDIQ GKTA | LVTGASRGIG | RAIAISLAKQ  | KAKRLLLVAR  |
| Ana-90.p-ana90-4359 (1.0d-27)      | 1  | -----      | --MKIQ GKVA | LITGASRGIG | KAI AIELAKQ | GMKRLLILVAR |

|                          |            |    |       |              |             |            |            |
|--------------------------|------------|----|-------|--------------|-------------|------------|------------|
| Cyl-7417.p-Cyl-7417-4762 | (6.0d-27)  | 1  | ----- | --MNIRGKVA   | LITGASRGIG  | RAIAFELAKL | GMKRLILVAR |
| Nsp-0708.p-Nsp-0708-3536 | (2.0d-26)  | 1  | ----- | --MNIQGVKVA  | LITGASRGIG  | KAIALELAQQ | GVKRLILVAR |
| N-7107.p-N-7107-1296     | (2.0d-26)  | 1  | ----- | --MKIQGNVA   | LITGASRGIG  | KAIALALAQQ | GMKKLILVAR |
| Npun.p-NpR1019           | (4.0d-26)  | 1  | ----- | --MEIQGVKVA  | LITGASRGIG  | RAIALELAQV | GIKRLILVAR |
| N-7524.p-N-7524-4265     | (1.0d-25)  | 1  | ----- | --MNLQGVKVA  | LITGASRGIG  | RAIAIELAQQ | GVQRLILVAR |
| M7126-SCAD-E             |            | 1  | ----- | --MKIQGVKVA  | LITGASRGIG  | RAIALELAQQ | GIKRVILLAR |
| R7116-SCAD-E             |            | 1  | ----- | ---ME        | VIMIIQGCTA  | LITGASRGIG | RAIAIQLAHQ |
| cyt.p-cce_3588           | (3.0d-27)  | 1  | ----- | ---MKEV      | FFMNIQGVKTA | LITGASRGIG | RAIALELARN |
| ctc.p-c0110?06289        | (2.0d-26)  | 1  | ----- | ---MEV       | FFMNIQGVKTA | LVTGASRGIG | RAIALELAKN |
| cyr.p-c8801?0598         | (2.0d-26)  | 1  | ----- | --MKLLGKTG   | LITGASRGIG  | RAITLELAHQ | GFKRLLLVAR |
| Amar.p-AM1_6363          | (1.0d-30)  | 1  | ----- | --MKIQGVKTA  | LITGASRGIG  | RAIAKELAQQ | GMDKVILVAR |
| Amar.p-AM1_0210          | (1.0d-27)  | 1  | ----- | --MRLKNKTA   | LITGASRGIG  | KAIALELAQQ | GIARLILVAR |
| lyn.p-l8106?00785        | (4.0d-31)  | 1  | ----- | -----        | MVSTV       | LITGASQGS  | KATALLFAQK |
| ter.p-Tery_3453          | (8.0d-31)  | 1  | ----- | -----        | MLPTV       | LITGASQCG  | RETALLFARK |
| A29413.p-Ava0943         | (1.0d-30)  | 7  |       | IFRCFCIVEA   | QVNSYMTNTV  | IITGASQIG  | KATALLFARQ |
| A7120.p-A112963          | (5.0d-29)  | 7  |       | IFRCLCIVEA   | QVNSYMTNTV  | IITGASQIG  | KATALLFARH |
| Npun.p-NpR4797           | (3.0d-30)  | 1  | ----- | -----        | MAPT        | LITGASEGIG | KATALLFARQ |
| Cyl-7417.p-Cyl-7417-4424 | (3.0d-30)  | 1  | ----- | -----        | MAPT        | LITGASQIG  | KATALLFSRK |
| MAST-10914-SCAD-E        |            | 1  | ----- | -----        | MAPT        | LITGASQIG  | KATSLLFARK |
| M7126-SCAD-C             |            | 1  | ----- | -----        | MAPT        | IITGASQIG  | KATALLFAQQ |
| R7116-SCAD-D             |            | 1  | ----- | -----        | MPSA        | IITGGSQIG  | KATALLFARK |
| Npun.p-NpF0199           | (2.0d-29)  | 22 |       | SLLLDLDRWWRD | RIYNLNGKTV  | LITGGSRGLG | LVMARQLIQA |
| A7120.p-Alr5358          | (3.0d-156) | 1  | ----- | -----        | MTTLTGKTV   | LLTGASRGLG | VYIARALAKE |
| A29413.p-Ava2596         | (8.0d-151) | 1  | ----- | -----        | MTTLTGKTV   | LLTGASRGLG | VYIARALAKE |
| N-7524.p-N-7524-5224     | (2.0d-121) | 1  | ----- | -----        | MTTLTGKTV   | LLTGASRGLG | IHIARALAKE |
| Cyl-7417.p-Cyl-7417-1544 | (2.0d-100) | 1  | ----- | -----        | MKILADKTV   | LLTGASRGLG | VYIARVLARE |
| MAST-10914-SCAD-A        |            | 1  | ----- | -----        | MKTIAGKTV   | VLTGASGGIG | VFIARALARE |
| N-7524.p-N-7524-5355     | (2.0d-74)  | 1  | ----- | -----        | MKSIAGKTV   | LLTGATGGIG | VFIARALAKE |
| Npun.p-NpF3363           | (2.0d-81)  | 1  | ----- | -----        | MTSIAGKTV   | LLTGASRGIG | VFIARALAKE |
| R7116-SCAD-A             |            | 1  |       | LLLMSNAQFR   | PINNIEGKTV  | ILTGASRGIG | AFIARELAKK |
| cyr.p-c8801?3820         | (4.0d-26)  | 1  | ----- | -----        | MTTKTA      | LITGASFGIG | TAFQAELAAR |
| A7120.p-A111418          | (8.0d-26)  | 1  | ----  | MFRLET       | PSMSFTNKTI  | VLTGASAGIG | RMLAISLSQQ |
| consensus                |            | 51 |       |              |             |            | DANLVLAARN |

.:\*\*.\* \*\*

|                              |           |     |             |            |            |            |            |
|------------------------------|-----------|-----|-------------|------------|------------|------------|------------|
| A7120.p-Alr1894              | (1.0d-26) | 44  | SSTAADDEVVA | EITGAG--GE | AVALKADVSQ | VEQVDNLING | AIDKFK--RI |
| A29413.p-Ava3764             | (1.0d-26) | 44  | SSTAADDEVVA | EITGAG--GE | AVALQADVSQ | VDQVDNLIDG | AIDKFK--HI |
| N-7524.p-N-7524-0010         | (9.0d-30) | 44  | SSGAADNLVA  | EITGAG--GE | AIALQADVSQ | ADQVDALINA | VMDKFK--RV |
| M7126-SCAD-B                 |           | 47  | SSGAADSLVA  | EISGAG--GE | AIAIQADVSQ | AEQVDALFNT | VIDKFK--RV |
| nod.p-n9414?22428            | (4.0d-28) | 40  | YSGAAESVVA  | DIIADG--GQ | AIALQADVSQ | AQQVDTLIST | VMEKFK--RI |
| MAST-10914-SCAD-B            |           | 47  | SNHAAEEVVD  | TITKAG--GS | AIALQADVSQ | VSQVEALVNT | VMEKFN--RV |
| Cal-6303.p-Cal-6303-1520     | (5.0d-28) | 47  | SSSAADAVVD  | TITQAG--GN | AVALQADVSK | TEEVDALINA | VMEKFK--RV |
| Npun.p-NpF2349               | (4.0d-29) | 40  | SSAAAEAVVT  | EITAVG--GQ | AIAIQADVSK | GDQVDALVNA | VMEKFS--RV |
| N-7107.p-N-7107-0937         | (1.0d-27) | 47  | SSTAADDEVVT | DITAVG--GQ | AIALQADVSQ | ADQVEGLINA | TTEKFG--RV |
| Ana-90.p-ana90-1712          | (1.0d-28) | 40  | SSTAADDEVVA | EITAAG--GE | AIALQADVSQ | ENQVDTLIKT | TLEKFK--RV |
| Acyl-7122.p-acyl-4545        | (9.0d-28) | 40  | SSAAAEVVA   | EIIANG--GD | AFALKADVSQ | PDQVDTLINT | TVEKYK--RV |
| Nsp-0708.p-Nsp-0708-2353     | (9.0d-27) | 40  | SSAAADQLVA  | KITAKG--GD | AITLQADVSQ | SDQVDTLINT | TLEKFK--RI |
| Cyl-505.p-Cyl-505-0204       | (2.0d-28) | 40  | SSTAAEKVVS  | EIIALG--GE | AIALQADVSQ | AGQVEDMVNK | TLETFN--RI |
| Cyl-7417.p-Cyl-7417-2349     | (6.0d-29) | 47  | SSAAADKVVV  | EITAAG--GI | AIALQADVSQ | VDQVDALVKL | VTDKFK--RI |
| R7116-SCAD-C                 |           | 47  | SSKAADDELVA | EITAAG--GS | AIALQADVSS | SEEVDKLINT | VLEKFK--KI |
| ter.p-Tery_3438              | (2.0d-28) | 47  | SSDTAEVVA   | EIVAAG--GN | GLALQADVSQ | VEEVDNLIKE | VMEKWS--RV |
| lyn.p-l8106?21814            | (1.0d-27) | 47  | SSGAADELVE  | EITNSG--GN | AIALCADVSQ | AEQVDTLINT | VMEKWG--RV |
| Amar.p-AM1_5632              | (1.0d-26) | 40  | SSGAADAVVA  | EITGQG--GE | ALALQANVAE | ADQVDTLFKT | VLDKWG--RA |
| cyr.p-c8801?2930             | (1.0d-28) | 43  | SSSAAEELVQ  | AIINSG--GE | AIAVQGDVSK | TEEVDTLIQT | TLDKFG--RI |
| S6803.p-Slr0886              | (4.0d-27) | 40  | SSTAADAVVA  | EIIANG--GE | AIAVQANVAN | ADEVDQLIKT | TLDKFS--RI |
| mae.p-MAE_33900              | (3.0d-29) | 47  | SSSAADAVVE  | EITAAG--GK | AIALQADVAK | SEEVDNLVDS | TKEKFG--HI |
| TeBP1.p-tlr1502              | (5.0d-29) | 38  | SAAEALEVQ   | RIEQQG--GT | AIAIAADVSV | PEQVDTLVAK | TVETYG--RV |
| S7942.p-Synpcc7942_0684      | (4.0d-26) | 42  | SAGAADEVVA  | AIAAAG--GE | AFAVKADVSQ | ESEVEALFAA | VIERWG--RL |
| syx.p-SynWH7803_1861         | (7.0d-30) | 43  | SPDAADAVVK  | EIESGG--GK | AYALQADVGD | EEAVDALIKT | VLERSG--RI |
| S7805.p-WH7805_13603         | (5.0d-28) | 43  | SPDAAEAVVK  | EIESMG--QK | GYALQADVGD | EDAVDALIKT | VLERSG--RI |
| S9916.p-RS9916_33507         | (8.0d-31) | 43  | SPDAAESVVN  | EITAAG--GK | AYALQANVAD | EDAVDGLIKT | VLERSG--RI |
| Ssp-RS9917.p-Ssp-RS9917-1614 | (2.0d-29) | 101 | SAAEADEVVA  | EILEAG--GQ | AYALKADVAE | EHAVEAMVKT | ALERSG--RI |
| S9917.p-RS9917_09056         | (3.0d-29) | 43  | SAAEADEVVA  | EILEAG--GQ | AYALKADVAE | EHAVEAMVKT | ALERSG--RI |
| syg.p-sync_2137              | (4.0d-29) | 43  | SSDAAEAVVA  | EIQAKG--GS | AYALQADVAD | EASVDDLIKT | VLKRSE--RI |
| P9313.p-PMT1333              | (6.0d-29) | 43  | SADAAEEVVQ  | AITSNG--GS | AYAIKANVAE | EDAVDQLIKT | VLERSS--RL |
| pmf.p-P9303_06521            | (1.0d-28) | 55  | SADAAEEVVK  | AITSNG--GS | AYAIKANVAE | EDAVDQLIKT | VLERSS--SL |
| S107.p-BL107_09856           | (2.0d-28) | 60  | SAAAADDEVVT | AIEALG--GK | AYALQANVSV | ESDVDGLIKA | VLDRSG--RI |
| S9902.p-Syncc9902_1745       | (4.0d-28) | 43  | SAAAADDEVVA | AIEALG--GK | AYALQANVSL | ESDVDGLIKT | VLERSG--RI |
| S9605.p-Syncc9605_0617       | (4.0d-27) | 57  | SAAAADDEVVA | AITTAG--GK | AYALQASVSV | ETEVDGLIKT | VLERSG--RL |
| S8102.p-SynW1852             | (9.0d-28) | 43  | SAGAADEVVA  | SINAAG--GK | AYALKANVSI | EEEVDGLIKA | VLERSG--RL |
| syr.p-SynRCC307_0681         | (2.0d-28) | 43  | SADAAEQVVS  | AITAAG--GS | AYALKADVSQ | EDQVEQLMAA | VLEKSG--RI |
| S5701.p-WH5701_07809         | (1.0d-28) | 45  | SADAAEAVVA  | AITAAG--GR | AWSHRADVSQ | EADVEAMVKQ | VLERSG--RL |
| pmn.p-PMN2A_1785             | (5.0d-28) | 43  | SLENANKVVS  | EINSFG--GK | AYPLQADISN | ENSVNELIKT | VLEKNN--KI |
| pme.p-NATL1_05081            | (1.0d-27) | 43  | SLENANKVVS  | EINSFG--GK | AYPLQADISN | ENSVNLIKT  | VLEKNN--KI |

|                                    |                                                            |
|------------------------------------|------------------------------------------------------------|
| pmz.p-p9211?06582 (1.0d-27)        | 43 SAESAKDVVQ AITASG--GK AYSLQANVAD EESVNDLIKK VLERSG--RI  |
| PRO1375.p-Pro0452 (7.0d-27)        | 43 SATKAEVVVS LIKSTG--GK AYALQANVAD ESSVNELVDT VLEKSD--HI  |
| Gvi.p-glr3506 (5.0d-28)            | 41 SEEAQQVVA AIEAAG--GQ AVALKADVAD PEQVERLFAD LLAKYG--RL   |
| pmb.p-P9601_05091 (9.0d-28)        | 43 SDEKAEVVVN SIKNSG--GK AHKLFKFDVSR EDSVSSAFEE IIKING--SI |
| pmi.p-PMT9312_0453 (1.0d-27)       | 43 SDEKAEVVVN SIKNSG--GK AHKLFKFDVSK EDSVSSAFEE IIKING--SI |
| pmg.p-P9301_04781 (1.0d-27)        | 43 SDEKAEVVVN SIKNSG--GK AHKLFKFDVSR EDSVSSAFEE IIKVNG--SI |
| PMED4.p-PMM0453 (9.0d-28)          | 43 SDEKAEVVVN LIKESG--GK VHKLKFDVSK EESVSKAFEE IIKING--AI  |
| pmc.p-P9515_05161 (2.0d-27)        | 43 SDEKAEVVLN LIKGLG--GK VHKLKFDVSK EESVSQAFEE IIKING--SI  |
| Npun.p-NpR0578 (6.0d-27)           | 45 -EQGNQETVR LIEDLG--GR VLAVKCDVTR TEDVTAALSK TIETFG--RL  |
| Cyl-7417.p-Cyl-7417-0303 (5.0d-26) | 40 NEKEANRVAQ EIAANG--GK GFVAIGDLAT DTGADESVDK ALSILG--AI  |
| Npun.p-NpF2231 (1.0d-26)           | 41 -EELASLSAD AIKAIG--GK AIALITDVTQ EQSVADMVEQ TLVSFG--KI  |
| Cyl-7417.p-Cyl-7417-3400 (1.0d-26) | 41 -PELAIETAD AIKILG--RN ALAIPIDVTH EQAVADMVLQ TLTTFG--KI  |
| Acyl-7122.p-acyl-3225 (4.0d-28)    | 40 EDKLA-VAQ TAIEIG--VE AKAFVVDLAS VSQVKAKIQA IAHEFG--DI   |
| Nsp-0708.p-Nsp-0708-2459 (6.0d-26) | 40 QDKLER-VAA AAKEIG--VE AKAFVVDLSC VSQVQAKIQA IPHEFG--DI  |
| Ana-90.p-ana90-1189 (1.0d-28)      | 40 QDKLES-VAK AAQELG--VE AKAFVVDLAE VTQVKSIIQI IADEFG--NI  |
| Cyl-505.p-Cyl-505-2036 (2.0d-32)   | 40 QDKLQGVVA AAKAAG--VE AKAFVVDLSC VSQVKAKIQA IADEFG--DI   |
| A29413.p-Ava2536 (2.0d-28)         | 40 GDKLTP-VVE ATKQTG--VV AKAYTVDLAD VSQVEAKIQA IAIDFG--DI  |
| A7120.p-Alr5286 (2.0d-28)          | 54 LDKLTP-VVE ATKQTG--VV AKAYTVDLAD VSQVEAKIQA IAIDFG--DI  |
| N-7524.p-N-7524-4179 (1.0d-27)     | 40 LDKLET-VAQ ATKNTG--VA AKVYAVDLAD VSQVEAKMQA IASDFG--DI  |
| MAST-10914-SCAD-C                  | 44 VDKLTA-VCE AVSHTG--VE AKAYEVDLAC VAQVQEKMQA IALNFG--DI  |
| Cyl-7417.p-Cyl-7417-1063 (4.0d-30) | 40 VDKLEA-VAA AARLTG--VE ATAFVVDLAN VSQVQAKIQA IAIEFG--DI  |
| nod.p-n9414?21215 (5.0d-26)        | 39 LDKLET-VAQ AARHTG--VV AKAYAVDLAN ITQVKAIEIA IALDFG--GI  |
| N-7107.p-N-7107-1008 (2.0d-29)     | 40 LDKLEA-VAT AAKQTG--VE AKAYTLDLAD LPQVEAKINA IAQDFG--NI  |
| M7126-SCAD-A                       | 40 LDKLAA-VTT AAHTG--VK AQAYAVDLAC IEQVKENIQA IAHDFFG--HI  |
| R7116-SCAD-B                       | 39 EQKLAA-VEN AVKKG--VN AKTYVVDLAN VSQVQENMRQ IVLDFG--NI   |
| lyn.p-l8106?23630 (2.0d-26)        | 40 HETLET-IAQ QARASG--VE ANAYALDLAK VEQVHEQIDT IAAAFG--PI  |
| Amar.p-AM1_5634 (3.0d-27)          | 40 QAQLDE-LAQ TLQEQG--VE VRGVAIINLSE VGQVKSQISQ LLDQVG--SI |
| cyb.p-CYB_0189 (1.0d-27)           | 42 QPDLLA-VQA QIQAQG--GK AAVFPMDLAD LAALPQQLQA LLDQVG--VC  |
| cya.p-CYA_2793 (8.0d-26)           | 42 HPDLLG-VQA EIQAAG--GK AEFVPIIDLAD LRALPQRLQA LLDQVG--VC |
| M7126-SCAD-D                       | 39 SSEIEQ-IAQ QIRDAG--GS AQAI PADITD PIQVLNLFQR VDEYYG--KI |
| cyb.p-CYB_0005 (4.0d-34)           | 40 EGLLRN-VKD LVESRG--AE ALVVPTDMAD TAQVEALAQK ALDHFV--RV  |
| cya.p-CYA_0005 (2.0d-33)           | 40 EELLQN-VKD LVEKQG--TE ALVVPTDMAD TAQVEALAQK ALDRFV--RV  |
| N-7107.p-N-7107-5182 (3.0d-28)     | 41 GDRLEA-LAK HIAAIG--GK ALPIVTDITD ETQANNLIHK TNAQLG--QV  |
| Npun.p-NpR3707 (3.0d-27)           | 41 GDRIQA-LAE RIEASG--GK ALPIVTDVTD ENQVNHLVAK ANVELG--RV  |
| Acyl-7122.p-acyl-1205 (2.0d-26)    | 66 GDRLQA-VAK YITDNG--GQ ALSVIADITD EAQAKNLVQK ANAEFG--QV  |
| R7116-SCAD-F                       | 52 LERLQQ-LVE NLKLPS--EN FHLLLEDVRN RSAVE SAVSN LPSEWS--NI |
| Npun.p-NpF0204 (3.0d-28)           | 44 EDALRQ-LVD EIRAKG--GQ AIYVVADVGQ EEDVNRIAER AIAEFG--GF  |
| MAST-10914-SCAD-D                  | 39 DTTRLG EVAT EIEMLG--VE VVTLPLDLSQ VVEVNIAIAQ AWRDHG--PI |
| Cal-6303.p-Cal-6303-3407 (1.0d-27) | 39 NRQSLAEVAA EIEELG--TE AVILPLDLTQ IVEVNIAIAQ AWRDYG--AI  |
| Ana-90.p-ana90-4359 (1.0d-27)      | 39 DRQKLAEVAA QIEALG--VE TTIMALDLTH SINVNIAIAQ LWRSYG--PI  |



|                          |            |     |            |            |            |             |            |
|--------------------------|------------|-----|------------|------------|------------|-------------|------------|
| Cyl-7417.p-Cyl-7417-4762 | (6.0d-27)  | 39  | DRQKLAEVAQ | QIEAMG--VE | TTVLALDLAN | PVNINIAIAQ  | LWRHDG--PI |
| Nsp-0708.p-Nsp-0708-3536 | (2.0d-26)  | 39  | DHHKLAQVAQ | EIEEIG--TE | TIIIALDLTQ | SVNVNIAIAQ  | LWRNYG--PV |
| N-7107.p-N-7107-1296     | (2.0d-26)  | 39  | DRQKLTEVAE | EIEALG--TE | AVIMTLDLTR | ATEVNIAVAQ  | LWRNHG--PI |
| Npun.p-NpR1019           | (4.0d-26)  | 39  | DRQKLVEVAN | EIEAMG--TE | TAIVPLDLTQ | TIEVNIAVAQ  | LWRNFG--QI |
| N-7524.p-N-7524-4265     | (1.0d-25)  | 39  | DRQKLREVAE | EIEAMG--VQ | ATTLAIDLTO | ATEVNIAIAQ  | LWRSYG--PI |
| M7126-SCAD-E             |            | 39  | DQRKLTQVAK | EIEAMG--TQ | ATIVAVDLTQ | AVELNIAVAQ  | IWRNYG--PI |
| R7116-SCAD-E             |            | 43  | SRDKLAEVAK | VVEAMG--VE | AIIMPLDLTK | PVVFVNVAQAQ | LWRSYG--AI |
| cyt.p-cce_3588           | (3.0d-27)  | 45  | NENKLLDVSA | DIKGFQ--VE | VIIPLDLTK  | VAVVNKTISQ  | AWRNHG--PI |
| ctc.p-c0110?06289        | (2.0d-26)  | 44  | NEHRLINLSA | DMEPLG--VE | VIIPLDLTD  | VVAVNTAIAQ  | AWRNHG--PI |
| cyr.p-c8801?0598         | (2.0d-26)  | 39  | DAKQLTAVAA | EVEAMG--VD | VVIIALDLTQ | LTAVNIAISQ  | AWRDYG--PI |
| Amar.p-AM1_6363          | (1.0d-30)  | 39  | NQARLQEVAT | EIEAIG--TQ | AVVLPLDLTQ | TVEVNIAIAQ  | TWKQHG--PI |
| Amar.p-AM1_0210          | (1.0d-27)  | 39  | QQCCLKHLTR | EIHQLAPEVD | VVVISLDTQ  | TGQIKQFIPQ  | ALSDFG--PI |
| lyn.p-l8106?00785        | (4.0d-31)  | 36  | FERLET-AAN | EVRSLG-GSA | -FAIATDVGE | VQQVQELVEK  | ALEVYQ--NI |
| ter.p-Tery_3453          | (8.0d-31)  | 36  | LDRLAT-TAN | EVRETG-KSA | -LAIPTDVTD | AKQVEYLVKK  | AIELYE--KI |
| A29413.p-Ava0943         | (1.0d-30)  | 57  | PDRLEA-IAT | EIRELG-QEA | -IAIPTDVKD | ATQVNNMIQK  | AIAHFG--QV |
| A7120.p-A112963          | (5.0d-29)  | 57  | LDRLEA-IAT | EIREMG-QQA | -IAISTDVKD | ATQVNNMMQK  | AIAHFG--QV |
| Npun.p-NpR4797           | (3.0d-30)  | 36  | ADRLEA-LAQ | EVQSIG-CPA | PLTITCDVTD | SSQVNALVQK  | ALGNYG--YI |
| Cyl-7417.p-Cyl-7417-4424 | (3.0d-30)  | 36  | TERLEA-TAQ | EVQSLG-LAA | PLTVTCDVTN | PSQVEMLVQK  | ALEHYG--YI |
| MAST-10914-SCAD-E        |            | 36  | LDRLES-VAQ | EVQSLG-RPA | PLTISCDVTD | PSQVNSLVEK  | ALDHYG--YI |
| M7126-SCAD-C             |            | 36  | ANNLEA-LAQ | QIQSLG-LKT | PLTFACDVKD | PSQVQTMTQK  | AWEQYN--YI |
| R7116-SCAD-D             |            | 35  | LETLEA-TAA | EIRAIG-TKV | -LAVPCDVSQ | EAEVNNLIPK  | ALEYFG--SI |
| Npun.p-NpF0199           | (2.0d-29)  | 72  | PEELER-SRI | ELEQRG-GEV | -LAVPCDVTD | KTQVEQMVQQ  | VRDRFG--AI |
| A7120.p-Alr5358          | (3.0d-156) | 40  | QSGLAQ-TCN | AVKAAG--GK | AIAIPFDVRN | TSQLSALVQQ  | AQDIVG--PI |
| A29413.p-Ava2596         | (8.0d-151) | 40  | QSGLAQ-TCN | VVKAAG--GK | AIAIPFDVRN | ISQLSALVQQ  | AQDIVG--PI |
| N-7524.p-N-7524-5224     | (2.0d-121) | 40  | RSGLEQ-TCH | AVNAAG--GR | AIAIPFDITK | VGELSALTQQ  | VQSTVG--PV |
| Cyl-7417.p-Cyl-7417-1544 | (2.0d-100) | 40  | KSGLDK-TSD | EVTALG--GK | FIGFTFDLKK | VEELPILVQQ  | INKVVG--PV |
| MAST-10914-SCAD-A        |            | 40  | KESLEK-ISA | EVEIAG--GR | GISIPFDISK | VEELSVLVQQ  | IHELAG--PI |
| N-7524.p-N-7524-5355     | (2.0d-74)  | 40  | EEKLNQ-ICA | EVDALG--GK | GISIAFDISN | LEELPDLVDK  | INQFAG--QI |
| Npun.p-NpF3363           | (2.0d-81)  | 40  | HQQLDN-LTT | ELKALG--CN | FIPFTCDISN | LSELPILLNK  | INQIVG--DV |
| R7116-SCAD-A             |            | 51  | QEGLDK-ICN | EINDLG--GK | GIGINFNISK | VERIPELVYE  | IKQLTGSFQV |
| cyr.p-c8801?3820         | (4.0d-26)  | 37  | QDKLYQLAET | LKQETA--IE | VEVIVQDLVQ | PGATKAVYDR  | VQEKGL--TV |
| A7120.p-A111418          | (8.0d-26)  | 47  | QEALQQTMTA | CTNYPG---K | VIAVHTDVTQ | AEACQQLIER  | AIATFG--QI |
| consensus                |            | 101 |            |            |            |             |            |

|                              |           |     |            |            |            |            |            |
|------------------------------|-----------|-----|------------|------------|------------|------------|------------|
| A7120.p-Alr1894              | (1.0d-26) | 90  | DILVNNAGIT | -RDTLLLRMK | PEDWQAVIDL | NLTGVFLCTR | AVSKMLKQ-  |
| A29413.p-Ava3764             | (1.0d-26) | 90  | DILVNNAGIT | -RDTLLLRMK | PEDWQAVIDL | NLTGVFLCTR | AVSKMLKQ-  |
| N-7524.p-N-7524-0010         | (9.0d-30) | 90  | DILVNNAGIT | -RDTLLLRMK | LEDWQAVIDL | NLTGVFLCTR | SVSKIMLKQ- |
| M7126-SCAD-B                 |           | 93  | DILVNNAGIT | -RDTLLLRMK | PEDWQAVIDL | NLTGVFLCTR | AASKIMLKQ- |
| nod.p-n9414?22428            | (4.0d-28) | 86  | DILVNNAGIT | -RDTLLLRMK | PEDWQAVIDL | NLTGVFLCTR | AVSKIMLKQ- |
| MAST-10914-SCAD-B            |           | 93  | DILVNNAGIT | -RDTLLLRMK | PEDWQAVIDL | NLTGVFLCTR | AVSKIMLKQ- |
| Cal-6303.p-Cal-6303-1520     | (5.0d-28) | 93  | DILVNNAGIT | -RDTLLLRMK | QEDWQAVIDL | NLTGVFLCTR | AASKIMLKQ- |
| Npun.p-NpF2349               | (4.0d-29) | 86  | DILVNNAGIT | -RDTLLLRMK | PEDWQAVIDL | NLTGVFLCTR | AVSKIMLKQ- |
| N-7107.p-N-7107-0937         | (1.0d-27) | 93  | DILVNNAGIT | -RDTLLLRMK | PEEWQAVIDL | NLTGVFLCTR | AVSKIMLKQ- |
| Ana-90.p-ana90-1712          | (1.0d-28) | 86  | DILVNNAGIT | -RDTLLLRMK | LEEWQAVIDL | NLTGVFLCTR | VVSKIMLKQ- |
| Acyl-7122.p-acyl-4545        | (9.0d-28) | 86  | DILVNNAGIT | -RDTLLLRMK | LEDWQAVIDL | NLTGVFLCTR | LVSKIMLKQ- |
| Nsp-0708.p-Nsp-0708-2353     | (9.0d-27) | 86  | DILVNNAGIT | -RDTLLLRMK | LEEWQAVIDL | NLTGVFLCTR | AVSKTMLRQ- |
| Cyl-505.p-Cyl-505-0204       | (2.0d-28) | 86  | DILVNNAGIT | -RDTLLLRMK | LEDWQAVIDL | NLTGVFLCTR | AVSKIMLKQ- |
| Cyl-7417.p-Cyl-7417-2349     | (6.0d-29) | 93  | DILVNNAGIT | -RDALLLRMK | LEEWQAVIDL | NLTGVFLCTR | AVSKIMLKQ- |
| R7116-SCAD-C                 |           | 93  | DILVNNAGIT | -RDTLLLRMK | PEDWQAVINL | NLTGVFLCTR | AVSKGMLKQ- |
| ter.p-Tery_3438              | (2.0d-28) | 93  | DILVNNAGIT | -RDTLLLRMK | LEDWQSVIDL | NLTGVFLCTR | AVSKIMLKQ- |
| lyn.p-l8106?21814            | (1.0d-27) | 93  | DILVNNAGIT | -RDTLLLRMK | PEEWQAVIDL | NLTGVFLCTR | AVSKIMLKQ- |
| Amar.p-AM1_5632              | (1.0d-26) | 86  | DILVNNAGIT | -RDTLLLRMK | PEDWQAVINL | NLTGVFLCTR | AVSKVMLKQ- |
| cyr.p-c8801?2930             | (1.0d-28) | 89  | DILVNNAGIT | -RDTLLLRMK | LEQWQEVIDL | NLTGVFLCTR | AVTKTMLKQ- |
| S6803.p-Slr0886              | (4.0d-27) | 86  | DILVNNAGIT | -RDTLLLRMK | LEDWQAVIDL | NLTGVFLCTR | AVSKMLKQ-  |
| mae.p-MAE_33900              | (3.0d-29) | 93  | DILVNNAGIT | -RDTLLLRMK | LEDWQAVIDL | NLTGVFLCTR | AVSKMLKQ-  |
| TeBP1.p-tlr1502              | (5.0d-29) | 84  | DILVNNAGIT | -RDTLLLRMS | LEDWQAVINL | NLTGVFLCTR | AVSKMLKQ-  |
| S7942.p-Synpcc7942_0684      | (4.0d-26) | 88  | DILVNNAGIT | -RDTLLLRMK | RDDWQSVIDL | NLTGVFLCTR | AAAKIMLKQ- |
| syx.p-SynWH7803_1861         | (7.0d-30) | 89  | DILVNNAGIT | -RDGLLMRMK | AADWNAVINL | NLTGVFLCTR | AVTRPMLKQ- |
| S7805.p-WH7805_13603         | (5.0d-28) | 89  | DILVNNAGIT | -RDGLLMRMK | STDWNAVINL | NLTGVFLCTR | AVTRPMLKQ- |
| S9916.p-RS9916_33507         | (8.0d-31) | 89  | DILVNNAGIT | -RDGLLMRMK | TADWQSVIDL | NLTGVFLCTR | AVTRPMLKQ- |
| Ssp-RS9917.p-Ssp-RS9917-1614 | (2.0d-29) | 147 | DILVNNAGIT | -RDGLLMRMK | TDDWQAVINL | NLTGVFLCTR | AVTRTMLKQ- |
| S9917.p-RS9917_09056         | (3.0d-29) | 89  | DILVNNAGIT | -RDGLLMRMK | TDDWQAVINL | NLTGVFLCTR | AVTRTMLKQ- |
| syg.p-sync_2137              | (4.0d-29) | 89  | DILVNNAGIT | -RDGLLMRMK | TEDWQAVINL | NLTGVFLCTR | AVTRPMLKQ- |
| P9313.p-PMT1333              | (6.0d-29) | 89  | DILVNNAGIT | -RDGLLMRMK | TEDWQAVVNL | NLTGVFLCTR | AVARTMLKQ- |
| pmf.p-P9303_06521            | (1.0d-28) | 101 | DILVNNAGIT | -RDGLLMRMK | TEDWQAVVNL | NLTGVFLCTR | AVARTMLKQ- |
| S107.p-BL107_09856           | (2.0d-28) | 106 | DILVNNAGIT | -RDGLLMRMK | TDDWQSVIDL | NLTGVFLCTR | AIARPMLKQ- |
| S9902.p-Syncc9902_1745       | (4.0d-28) | 89  | DILVNNAGIT | -RDGLLMRMK | TDDWQSVIDL | NLTGVFLCTR | AIARPMLKQ- |
| S9605.p-Syncc9605_0617       | (4.0d-27) | 103 | DILVNNAGIT | -RDGLLMRMK | TDDWQSVIDL | NLTGVFLCTR | AVSRPMLKQ- |
| S8102.p-SynW1852             | (9.0d-28) | 89  | DILVNNAGIT | -RDGLLMRMK | TSDWQAVIDL | NLTGVFLCTR | AVARPMLKQ- |
| syr.p-SynRCC307_0681         | (2.0d-28) | 89  | DILVNNAGIT | -RDGLLMRMK | TPDWQAVLDL | NLTGVFLCTR | AVTRTMLKQ- |
| S5701.p-WH5701_07809         | (1.0d-28) | 91  | DILVNNAGIT | -RDGLLMRMK | TADWQSVIDL | NLTGVFLCTR | AVCRTMLKA- |
| pmn.p-PMN2A_1785             | (5.0d-28) | 89  | DILVNNAGIT | -KDGLLRMK  | TDDWQKVLDL | NLTGVFLCTR | AVSRQMLKQ- |
| pme.p-NATL1_05081            | (1.0d-27) | 89  | DILVNNAGIT | -KDGLLRMK  | TDDWQKVLDL | NLTGVFLCTR | AVSRQMLKQ- |

|                                    |                                                            |
|------------------------------------|------------------------------------------------------------|
| pmz.p-p9211?06582 (1.0d-27)        | 89 DALINNAGIT -KDGLLMRMR TEDWQSVINL NLTGVFLCTR AVARPMLKQ-  |
| PRO1375.p-Pro0452 (7.0d-27)        | 89 DILINNAGIT -KDGLLMRMK TEDWQSVLNL NLTGVFLCTK AVSRSMKQ-   |
| Gvi.p-glr3506 (5.0d-28)            | 87 DALVNNAGIT -RDGLILRMS LEDWNDVVSL NLTGTFLCLK AASRIMLKQ-  |
| pmb.p-P9601_05091 (9.0d-28)        | 89 DILINNAGIT -RDGLLMRMK SEQWDDVLNT NLKGVFLCTK YASKFMMKK-  |
| pmi.p-PMT9312_0453 (1.0d-27)       | 89 DILINNAGIT -RDGLLMRMK SEQWDDVLNT NLKGVFLCTK YASKFMMKK-  |
| pmg.p-P9301_04781 (1.0d-27)        | 89 DILINNAGIT -RDGLLMRMK SEQWDDVLNT NLKGVFLCTK YASKFMMKK-  |
| PMED4.p-PMM0453 (9.0d-28)          | 89 DILVNNAGIT -RDGLLMRMK SEQWDDVLNT NLKGVFLCTK YASKFMIKK-  |
| pmc.p-P9515_05161 (2.0d-27)        | 89 DILINNAGIT -RDGLLMRMK SEQWDDVLNT NLKGVFLCTK YASKFMLKK-  |
| Npun.p-NpR0578 (6.0d-27)           | 90 DFAFNAGVE QKKAATAELE EAEDRIVNT DLRSVFLCLK HEIPLMLKQ-    |
| Cyl-7417.p-Cyl-7417-0303 (5.0d-26) | 86 DILVNTGTY -FMSGWMNST SSQWVDLYNI NVVSMVRTIQ LLIPRMREL-   |
| Npun.p-NpF2231 (1.0d-26)           | 86 DILVANAGIQ -RRYFVADLP LAEFQAILDV NLLGVFLTSK AVLPFYYSR-  |
| Cyl-7417.p-Cyl-7417-3400 (1.0d-26) | 86 DILVTNAGIQ -RRYFVADLP RAEFQAMLVD NLLGAFFCCQ AVLPNFYNO-  |
| Acyl-7122.p-acyl-3225 (4.0d-28)    | 85 DILVNNAGMG -YTANLSETP LEDWQQVINL NLTSAFQCMM GILPEMRQR-  |
| Nsp-0708.p-Nsp-0708-2459 (6.0d-26) | 85 DILVNNAGMG -YTANLSETP LEDWQQVINL NLTSVFACIM GTLPGMRQR-  |
| Ana-90.p-ana90-1189 (1.0d-28)      | 85 NILINNAGIT -YTGNLSETP LEDWQQVINL NLTSVFQCMM GILPRMRQR-  |
| Cyl-505.p-Cyl-505-2036 (2.0d-32)   | 85 DILVNNAGMG -YTGNLSDTS LEDWRRVIDL NLTSVFQCTM GILPRMRQR-  |
| A29413.p-Ava2536 (2.0d-28)         | 85 DILVNNAGVA -YTATLSETP LADWQQVINL NLTSVFECIK GILPRMRAR-  |
| A7120.p-Alr5286 (2.0d-28)          | 99 DILVNNAGVA -YTATLSETP LADWQQVINL NLTGVFECIK GILPTMRDR-  |
| N-7524.p-N-7524-4179 (1.0d-27)     | 85 DILVNNAGIG -YTGILRETT LEDWQQVINL NLTSVFQCIQ GILPGMLAR-  |
| MAST-10914-SCAD-C                  | 89 DILVNNAGMG -YTATLSETP LSDWQQVIEL NLTSVFQSIM GILPRMRER-  |
| Cyl-7417.p-Cyl-7417-1063 (4.0d-30) | 85 DILVNNAGMA -YTATLSETP LEEWQQVINL NLTSVFQCIN GILPTMRHR-  |
| nod.p-n9414?21215 (5.0d-26)        | 84 DILVNNAGIA -YTANLSETP LEDWQKVINL NLTSVFQCLM GILPGMRSR-  |
| N-7107.p-N-7107-1008 (2.0d-29)     | 85 DILVNNAGIG -YTANLIDTS LEDWQKVINI NLTSVFECIK GILPGMRDR-  |
| M7126-SCAD-A                       | 85 DILVNSAGIA -YTANLSEIP LEDWQQVLNL NLTSVFECIM GILPGMRDR-  |
| R7116-SCAD-B                       | 84 DILVNNAGMG -YTATLSQTP LSDWQQVIDL NLTSVFECIK GILPSMREQ-  |
| lyn.p-l8106?23630 (2.0d-26)        | 85 DILVNNAGIG -YTSPLVSTP LTEWQQVLDL NLTSVFQCVQ GVLPGMRER-  |
| Amar.p-AM1_5634 (3.0d-27)          | 85 DILINNAGMG -YTGELIDMP LADWQRVLGL NVTSVFECVQ AVLPGMRSQ-  |
| cyb.p-CYB_0189 (1.0d-27)           | 87 DVLVNNAGMA -HVGPLATLP LSDWQRVIDL NLTA AFLCAQ AVLPGMRRQ- |
| cya.p-CYA_2793 (8.0d-26)           | 87 DVLVNNAGIA -HVGPLATLS LSDWQRVIDL NLTA AFLCAQ AVLPAMRRQ- |
| M7126-SCAD-D                       | 84 DILINNAGIG -LFGPVEELT DEALEQMLAV NVKGTVYCSQ AAFKRMKQA-  |
| cyb.p-CYB_0005 (4.0d-34)           | 85 DILVNNAGYG Q-MGPVEEVD VAAMRRQFEV NVFGLHALTR ALLPQMRER-  |
| cya.p-CYA_0005 (2.0d-33)           | 85 DILVNNAGYG Q-MGPVEEVD VAAMRRQFEV NVFGLHALTR ALLPQMRER-  |
| N-7107.p-N-7107-5182 (3.0d-28)     | 86 DILVNNAGVA L-TGNIDGGN TSDWRRMFDV NVFGVLYTTH AVLPKFKAQ-  |
| Npun.p-NpR3707 (3.0d-27)           | 86 DILVNNAGIA L-LGTIEAGN SSDWRRSFDI NVLGLLYATH AVLPPLLKQ-  |
| Acyl-7122.p-acyl-1205 (2.0d-26)    | 111 DILVNNAGIS F-PGRIENAD PANWRKMIDI NVLALMYTTY TVLPKFKAQ- |
| R7116-SCAD-F                       | 97 DILINNAGLS RGLNKLYEGS YQDWEEMIDT NVKGLLYLTR CVVPGMVER-  |
| Npun.p-NpF0204 (3.0d-28)           | 89 DTWVNNAGVS I-FGRCMDVS IPDMKRMFDT NFWGVVYGSR AAVNHFKQRK  |
| MAST-10914-SCAD-D                  | 85 DLLINCAGVA -HQT PFLNSR LPNVQTEIAV NLIGMYTITR IVARRMVVQ- |
| Cal-6303.p-Cal-6303-3407 (1.0d-27) | 85 HLLINCAGVA -HQTAFLESK LSDVQEELET NLIGMYSITR LIARRMVTQ-  |
| Ana-90.p-ana90-4359 (1.0d-27)      | 85 HLLVNCAGVA -HQNSFLQSK LPQLQEELSV NLMGMYTLTN LIAKRMVVSQ- |

|                                     |                                                            |
|-------------------------------------|------------------------------------------------------------|
| Cyl-7417.p-Cyl-7417-4762 (6.0d-27)  | 85 DLLVNCAGVA -YQNSFLQSK LPQVQEELSV NLMGMYTLTS LIARRMASQ-  |
| Nsp-0708.p-Nsp-0708-3536 (2.0d-26)  | 85 HILVNCAGVA -YQNSFLQSK LPQVQEELSV NLLGMYNLTS LIARRMVSQ-  |
| N-7107.p-N-7107-1296 (2.0d-26)      | 85 HLLVNCAGVA -YQTSFLRSK LFQVQEELSV NLLGMYTLTS LIARRMASQ-  |
| Npun.p-NpR1019 (4.0d-26)            | 85 HLLVNCAGVA -YQSSFLQSK MPQVQEELSV NLLGMYNLTS LIARRMVSQ-  |
| N-7524.p-N-7524-4265 (1.0d-25)      | 85 HLLINCAGVA -YQNSFLRSK LPQLQEELSV NLLGMYTLTS LIAKRMASQ-  |
| M7126-SCAD-E                        | 85 HLLVNCAGVA -YQNSFLQCK LPQVQEEISV NLMGMYTLTS LIARRMATQ-  |
| R7116-SCAD-E                        | 89 DMLVNCAGVA -HQNSFLKTK LPQVQEELSL NFMGTYTMTH IVARRMAKR-  |
| cyt.p-cce_3588 (3.0d-27)            | 91 DILVNCAGVA -HQTPFLHTN FSQVQAEELSV NLMATYQMTR LIAKRMAYR- |
| ctc.p-c0110?06289 (2.0d-26)         | 90 DLLVNCAGVA -HQTSFLRAS LSQVQAEELSV NLMATYQMTR LIARRMAYR- |
| cyr.p-c8801?0598 (2.0d-26)          | 85 DLLVNCAGVA -HQTSFLKAQ LSQVQNELNL NLMGTYAITR LVARRMAQR-  |
| Amar.p-AM1_6363 (1.0d-30)           | 85 HLLVNCAGVA -HQAPFLQTK LPKVQEELSL NLMGIYSMTQ VLARRMASK-  |
| Amar.p-AM1_0210 (1.0d-27)           | 87 DLLVNNAGVA -HQASFLSST IEEFEAEIRL NLCGTFAITR LIAQHMVKH-  |
| lyn.p-l8106?00785 (4.0d-31)         | 81 DVLVNNAGIC -LTGSMAKTT LEDWQQLMNT NFWGYVHTIN ALLPHFIER-  |
| ter.p-Tery_3453 (8.0d-31)           | 81 DVLVNNAGIC -LTGGIEYTT LEDFQQLMNI NFFGYVNTIK ALLPHFLSR-  |
| A29413.p-Ava0943 (1.0d-30)          | 102 DVLINNAGIF -CLGSVENFS LEDRHQIIDT NLWGYIHTIY AILPYFLQR- |
| A7120.p-A112963 (5.0d-29)           | 102 DVLINNAGIF -CLGSVENFS LEDWHQIIDT NLWGYIHTIH AILPHFLQR- |
| Npun.p-NpR4797 (3.0d-30)            | 82 DVLINNAGIF -ASGPVEQFS LSDWHQIIDT NLWGYIHTIN AILPHFLQR-  |
| Cyl-7417.p-Cyl-7417-4424 (3.0d-30)  | 82 DVLVNNAGIF -ASGPVEQFS LSDWHQVIDT NLWGYIHTIQ ALLPHFLQR-  |
| MAST-10914-SCAD-E                   | 82 DVLINNAGVF -AEGPVDGFS LNDWHQVIDL NLWGYIHTIH ALLPHFLQR-  |
| M7126-SCAD-C                        | 82 DLLINNAGIF -ASGPVENFS LSDWHDVIDT NLWGYIHTIN AILPHFLQR-  |
| R7116-SCAD-D                        | 80 DVLINNAGVC -MTGPIENTS LDDWHRVIDV NLWGYIHTIH ALLPHFLVR-  |
| Npun.p-NpF0199 (2.0d-29)            | 117 DILINNAGVD -FVGPMDLMT VEDYDDAMKL HFWAPLYASY AVLPQMRER- |
| A7120.p-Alr5358 (3.0d-156)          | 85 DVLINNAGIE -INGTFANYS LAEIQSIFNT NLLAAMELTR LLLPSMMER-  |
| A29413.p-Ava2596 (8.0d-151)         | 85 DVLINNAGIE -INAAFANYS LAEIQSIFNT NLLAVMELTR LLLPSMMER-  |
| N-7524.p-N-7524-5224 (2.0d-121)     | 85 DILINNAGIE -IISAFANYS LAEIHVSFNT NLLATMELTR LLLPNMMER-  |
| Cyl-7417.p-Cyl-7417-1544 (2.0d-100) | 85 DVLINNSGIE -LYRAFADYS LEDLQSVLTT NLLSAIELTR LLLPSMLER-  |
| MAST-10914-SCAD-A                   | 85 DILINNAIE -KYRPFQNYT LEDIQSILTT NLVAPMELSR LILPSMVDR-   |
| N-7524.p-N-7524-5355 (2.0d-74)      | 85 DILINNAIE -KYRNFQDYT LEDIQSILTT NLISGMELTR LIMPSMIAR-   |
| Npun.p-NpF3363 (2.0d-81)            | 85 DILINNAGIE -IYRSFPDYS LAEMQSVIST NLLAAMELSR LLLPNMLVQ-  |
| R7116-SCAD-A                        | 98 DILINNAGIE -IYRAFHHYS LKDIQLVLSV NLLAAIELSR LVLPMMLDK-  |
| cyr.p-c8801?3820 (4.0d-26)          | 83 DLLINNAGFG -DYGAFTERD LSRQVEMIQI NVVALVELTH LFLPMQOQK-  |
| A7120.p-A111418 (8.0d-26)           | 92 DILINNAGIG MLTRFDEVTD ISIFEQVMOA NYLGAVYCTH YALPYLKAS-  |
| consensus                           | 151 . . . :                                                |

|                              |           |     |            |            |            |            |            |
|------------------------------|-----------|-----|------------|------------|------------|------------|------------|
| A7120.p-Alr1894              | (1.0d-26) | 138 | -RSGRIINIT | SVAGQMGNPG | QANYSAAKAG | VIGFTKTVAK | ELASR--GIT |
| A29413.p-Ava3764             | (1.0d-26) | 138 | -RSGRIINIT | SVAGQMGNPG | QANYSAAKAG | VIGFTKTVAK | ELASR--GIT |
| N-7524.p-N-7524-0010         | (9.0d-30) | 138 | -RSGRIINIS | SVAGQMGNPG | QANYSAAKAG | VIGFTKTVAK | ELASR--GIT |
| M7126-SCAD-B                 |           | 141 | -RSGRIINIA | SVAGQMGNPG | QANYSAAKAG | VIGFTKTVAK | ELASR--GIT |
| nod.p-n9414?22428            | (4.0d-28) | 134 | -RSGRIINIA | SVAGQMGNPG | QANYSAAKAG | VIGFTKTVAK | ELASR--GIT |
| MAST-10914-SCAD-B            |           | 141 | -RSGRIINIT | SVAGQMGNPG | QANYSAAKAG | VIGFTKTIAK | ELASR--GIT |
| Cal-6303.p-Cal-6303-1520     | (5.0d-28) | 141 | -RSGRIINIT | SVAGQMGNPG | QANYSAAKAG | VIGFTKSVAK | ELAPR--GIT |
| Npun.p-NpF2349               | (4.0d-29) | 134 | -RSGRIINIT | SVAGQMGNPG | QSNYSAAKAG | VIGFTKSVAK | ELATR--GIT |
| N-7107.p-N-7107-0937         | (1.0d-27) | 141 | -RFGRIINIA | SVAGQMGNPG | QANYSAAKAG | VIGFTKTVAK | ELATR--GIT |
| Ana-90.p-ana90-1712          | (1.0d-28) | 134 | -RSGRIINIA | SVAGQMGNPG | QANYSAAKAG | VIGFTKTVAK | ELSSR--GIT |
| Acyl-7122.p-acyl-4545        | (9.0d-28) | 134 | -RSGRIINIA | SVAGQMGNPG | QANYSAAKAG | VIGFTKTVAK | ELASR--GIT |
| Nsp-0708.p-Nsp-0708-2353     | (9.0d-27) | 134 | -RSGRIINIS | SVAGQMGNPG | QANYSAAKAG | VIGFTKTVAK | ELASR--GIT |
| Cyl-505.p-Cyl-505-0204       | (2.0d-28) | 134 | -RSGRIINIS | SVAGQMGNPG | QANYSAAKAG | VIGFTKTVAK | ELASR--GIT |
| Cyl-7417.p-Cyl-7417-2349     | (6.0d-29) | 141 | -RSGRIINIA | SVAGQMGNPG | QANYSAAKAG | VIGFTKTVAK | ELASR--GIT |
| R7116-SCAD-C                 |           | 141 | -RSGRIINIA | SVAGQMGNPG | QANYSAAKAG | VIGLTKTLAK | EFASR--GIT |
| ter.p-Tery_3438              | (2.0d-28) | 141 | -KSGRIINVA | SVSGQMGNPG | QANYSAAKAG | VIGFTKTVAK | ELANR--GIT |
| lyn.p-l8106?21814            | (1.0d-27) | 141 | -RSGRIINIA | SVAGQMGNPG | QANYSAAKAG | VIGFTKTVAK | ELASR--GIT |
| Amar.p-AM1_5632              | (1.0d-26) | 134 | -RSGRIINIA | SVAGQMGNPG | QANYSAAKAG | VIGFTKTVAK | EMASR--GVT |
| cyr.p-c8801?2930             | (1.0d-28) | 137 | -KSGRIINIT | SVSGLMGNPG | QANYSAAKAG | VIGLTKTVAK | ELASR--GVT |
| S6803.p-Slr0886              | (4.0d-27) | 134 | -KSGRIINIT | SVAGMMGNPG | QANYSAAKAG | VIGFTKTVAK | ELASR--GVT |
| mae.p-MAE_33900              | (3.0d-29) | 141 | -KSGRIINIT | SVSGLMGNPG | QSNYSAAKAG | VIGLTKTLAK | EFASR--GIT |
| TeBP1.p-tlr1502              | (5.0d-29) | 132 | -KRGRINIA  | SVAGQMGNPG | QANYSAAKAG | VIGFSKTVAK | ELASR--GIT |
| S7942.p-Synpcc7942_0684      | (4.0d-26) | 136 | -RSGRIINIA | SVVGEMGNPG | QANYSAAKAG | VIGLTKTVAK | ELASR--GIT |
| syx.p-SynWH7803_1861         | (7.0d-30) | 137 | -KSGRIINIT | SVVGLMGNAG | QANYAAAKAG | VVGLTRSAK  | EMASR--GIT |
| S7805.p-WH7805_13603         | (5.0d-28) | 137 | -KSGRIINIT | SVVGLMGNAG | QANYAAAKAG | VVGLTRSAK  | EMASR--GIT |
| S9916.p-RS9916_33507         | (8.0d-31) | 137 | -KSGRIINIT | SVVGLMGNAG | QANYAAAKAG | VVGLTRSAK  | EMASR--GIT |
| Ssp-RS9917.p-Ssp-RS9917-1614 | (2.0d-29) | 195 | -KSGRIINIT | SVVGLMGNAG | QANYAAAKAG | VVGLTRSAK  | EMASR--GIT |
| S9917.p-RS9917_09056         | (3.0d-29) | 137 | -KSGRIINIT | SVVGLMGNAG | QANYAAAKAG | VVGLTRSAK  | EMASR--GIT |
| syg.p-sync_2137              | (4.0d-29) | 137 | -RSGRIINIT | SVVGLMGNAG | QANYAAAKAG | VVGLTRSSAK | EMASR--GIT |
| P9313.p-PMT1333              | (6.0d-29) | 137 | -KSGRIINIT | SVVGLMGNAG | QANYAAAKAG | VVGLTKSTAK | EVASR--GIT |
| pmf.p-P9303_06521            | (1.0d-28) | 149 | -KSGRIINIT | SVVGLMGNAG | QANYAAAKAG | VVGLTKSTAK | EFASR--GIT |
| S107.p-BL107_09856           | (2.0d-28) | 154 | -KSGRIINIT | SVVGLMGNAG | QANYAAAKAG | VIGLTRSTAK | ELASR--GIT |
| S9902.p-Syncc9902_1745       | (4.0d-28) | 137 | -KSGRIINIT | SVVGLMGNAG | QANYAAAKAG | VIGLTRSTAK | ELASR--GIT |
| S9605.p-Syncc9605_0617       | (4.0d-27) | 151 | -KSGRIINIT | SVVGLMGNAG | QANYAAAKAG | VIGLTRSTAK | ELASR--GIT |
| S8102.p-SynW1852             | (9.0d-28) | 137 | -KSGRIINIT | SVVGLMGNAG | QANYAAAKAG | VIGLTKSTAK | ELASR--GIT |
| syr.p-SynRCC307_0681         | (2.0d-28) | 137 | -KQGRINIA  | SVVGLMGNAG | QANYAAAKAG | VIGFTKSTAR | ELASR--GIT |
| S5701.p-WH5701_07809         | (1.0d-28) | 139 | -RSGRIINIT | SVVGLMGNPG | QANYSAAKAG | VIGFTRSTAA | ELASR--GVT |
| pmn.p-PMN2A_1785             | (5.0d-28) | 137 | -KKGRINIA  | SVVGLMGNPG | QANYSAAKAG | VVGLTQSAK  | EFASR--GIT |
| pme.p-NATL1_05081            | (1.0d-27) | 137 | -KKGRINIA  | SVVGLMGNPG | QANYSAAKAG | VVGLTQSAK  | EFASR--GIT |

|                                    |     |             |            |             |            |            |
|------------------------------------|-----|-------------|------------|-------------|------------|------------|
| pmz.p-p9211?06582 (1.0d-27)        | 137 | -KTGRIVNIT  | SVVGLMGNAG | QANYAAAKAG  | VVGLTKSTAK | EFASR--GIT |
| PRO1375.p-Pro0452 (7.0d-27)        | 137 | -RKGRINIIT  | SVVGLMGNAG | QANYASAKAG  | VIGFTKSAAK | EFASR--GIT |
| Gvi.p-glr3506 (5.0d-28)            | 135 | -RSGRVVNIS  | STSGVAGNAG | QANYSAAKAG  | VLGLTRSAAR | ELGSR--GIT |
| pmb.p-P9601_05091 (9.0d-28)        | 137 | -RSGSIVNIS  | SVVGIIGNPG | QANYSAAKAG  | VIGFTKTCAK | EFASR--GIN |
| pmi.p-PMT9312_0453 (1.0d-27)       | 137 | -RSGSIVNIS  | SVVGIIGNPG | QANYSAAKAG  | VIGFTKTCAK | EFASR--GIN |
| pmg.p-P9301_04781 (1.0d-27)        | 137 | -RSGSIVNIS  | SVVGIIGNPG | QANYSAAKAG  | VIGFTKTCAK | EFASR--GIN |
| PMED4.p-PMM0453 (9.0d-28)          | 137 | -RSGKIINIS  | SIVGIIGNPG | QANYSAAKAG  | VIGFTKTCAK | EFASR--GIN |
| pmc.p-P9515_05161 (2.0d-27)        | 137 | -RSGKIINIS  | SIVGIIGNPG | QANYSAAKAG  | VIGFTKTCAK | EFASR--GIN |
| Npun.p-NpR0578 (6.0d-27)           | 139 | -GGGAIVNTS  | SGAGVIGIKG | GAAYTAAKHG  | VIGLTKAAAL | DYASQ--NIR |
| Cyl-7417.p-Cyl-7417-0303 (5.0d-26) | 134 | -GWGRIINMA  | SSVATQPTP- | MADYSATKAA  | ILNLTVSLAK | ELAGT--GIT |
| Npun.p-NpF2231 (1.0d-26)           | 134 | -QEGNIILIA  | SDSGKHGYSY | NAAYCASKFA  | VVGFMEALAD | EAKHY--QVR |
| Cyl-7417.p-Cyl-7417-3400 (1.0d-26) | 134 | -RQGNIIILIA | SDSGKLGAY  | NSAYCASKFA  | VLGFMEALAD | EARAY--KVR |
| Acyl-7122.p-acyl-3225 (4.0d-28)    | 133 | -GTGTIINVA  | SIAAKQAFAG | WGAYCVSKAG  | LLALSQTLAQ | EERVH--GIR |
| Nsp-0708.p-Nsp-0708-2459 (6.0d-26) | 133 | -GQGTIINIA  | SIAAKQAFAG | WGAYCVSKAG  | LLALSQTLAI | EERSH--GIR |
| Ana-90.p-ana90-1189 (1.0d-28)      | 133 | -GQGTIINIA  | SIAGKQAFPG | WGAYCVSKAG  | LLFLSQTLAQ | EERAN--GIR |
| Cyl-505.p-Cyl-505-2036 (2.0d-32)   | 133 | -GQGTIINIA  | SIAAKQAFAG | WGVYCVSKAG  | LLALSQTLAQ | EERVH--GIR |
| A29413.p-Ava2536 (2.0d-28)         | 133 | -HTGTIINVS  | SIAAKQSFPH | WGVYSVSKAG  | LMALSQTLAQ | EERVH--GIR |
| A7120.p-Alr5286 (2.0d-28)          | 147 | -HTGTIINVS  | SIAAKQSFPH | WGVYSVSKAG  | LMALSQTLAQ | EERVH--GIR |
| N-7524.p-N-7524-4179 (1.0d-27)     | 133 | -GAGTIINVA  | SIAAKQAFPN | WGAYCVSKAG  | LLALAQTLAQ | EERTH--GIR |
| MAST-10914-SCAD-C                  | 137 | -GAGTIINLT  | SIAGKQAFAN | WGAYSVSKAG  | LIALSQTLAQ | EERVH--GIR |
| Cyl-7417.p-Cyl-7417-1063 (4.0d-30) | 133 | -GIGTIINVT  | SIAGKQPFPG | WGAYSASKAG  | LMALSLALAQ | EERAN--GIR |
| nod.p-n9414?21215 (5.0d-26)        | 132 | -HTGTIINVA  | SIAAKQPFPG | WGVYSVSKAG  | VMALSQTLAQ | EERAH--GIR |
| N-7107.p-N-7107-1008 (2.0d-29)     | 133 | -GTGTIINVA  | SIAAKQTFAG | WGAYCVSKAG  | LLALSQTLAQ | EERAH--GIR |
| M7126-SCAD-A                       | 133 | -GRGTIINVA  | SIAGKQAFPG | WGAYSVSKAG  | LISLSQTLAQ | EERVH--GIR |
| R7116-SCAD-B                       | 132 | -NRGTIINVA  | SIAGKQAFAN | WGAYSVSKAG  | VIALSQALAQ | EERNN--GIR |
| lyn.p-l8106?23630 (2.0d-26)        | 133 | -ASGTIVNVV  | SIAGQQVFPD | WGAYCVSKFG  | LMALSKAFAA | EERQN--GIR |
| Amar.p-AM1_5634 (3.0d-27)          | 133 | -QQGTIINIV  | SIAGQQAFPO | WGAYCASKFA  | LMGFTKSLAQ | EERPH--GIR |
| cyb.p-CYB_0189 (1.0d-27)           | 135 | -RCGTIVNVI  | SIAGKRAFPN | WGAYCASKFG  | LMGFSQALAE | EERQH--GIR |
| cya.p-CYA_2793 (8.0d-26)           | 135 | -RCGTIVNII  | SIAGKRAFPN | WGAYCASKFG  | LLGFSQALAA | EERQH--GIR |
| M7126-SCAD-D                       | 132 | -RSGIINIL   | STASKVGRAN | ESGYTASKWA  | QAGFTESLKA | EAKPF--GIR |
| cyb.p-CYB_0005 (4.0d-34)           | 133 | -GSGRILNLS  | SVAGQMSMPF | SGVYNATKFA  | VEALSDALRV | EVAPF--GIK |
| cya.p-CYA_0005 (2.0d-33)           | 133 | -GSGRILNLS  | SVAGQMSMPF | SGVYSATKFA  | VEALSDALRV | EVAPF--GIK |
| N-7107.p-N-7107-5182 (3.0d-28)     | 134 | -GSGHIVNIS  | SVAGRIARAG | VGIYNATKWG  | VNAFSESLRQ | EVLKD--NIR |
| Npun.p-NpR3707 (3.0d-27)           | 134 | -KSGHIVNIS  | SVAGRIARAG | VGIVYNATKWG | VNALSEALRQ | EVHKD--NIR |
| Acyl-7122.p-acyl-1205 (2.0d-26)    | 159 | -KSGHIVNIS  | SVAGRIARAG | MGAYNVTKWG  | VNAFSEALRQ | EVYQD--NIR |
| R7116-SCAD-F                       | 146 | -DRGHVVNIG  | SIAGHQTPG  | GNVYCATKAA  | VKAISEGLKQ | DLLGT--PVR |
| Npun.p-NpF0204 (3.0d-28)           | 138 | SGSGALINVG  | SFLGDRAVAV | QSTYSASKHA  | LHGWDALRT  | ELEAEGAPVS |
| MAST-10914-SCAD-D                  | 133 | -GSGTIVNVS  | SLMGKIAAPT | MATYSATKFA  | IVGFTQALRG | ELAAH--NIR |
| Cal-6303.p-Cal-6303-3407 (1.0d-27) | 133 | -HQGVIVNVS  | SLMGKVAAPT | MATYSATKFA  | IVGFTQALRG | ELASH--NIR |
| Ana-90.p-ana90-4359 (1.0d-27)      | 133 | -RQGIIVNVS  | SLMGKVAAPT | MATYSATKFA  | IVGFTQALRQ | ELAQH--NVR |

|                                     |     |             |            |            |            |            |
|-------------------------------------|-----|-------------|------------|------------|------------|------------|
| Cyl-7417.p-Cyl-7417-4762 (6.0d-27)  | 133 | -RQGTIVNVS  | SLMGKVAAPT | MATYSATKFA | IIGFTQALRQ | ELAAH--NIR |
| Nsp-0708.p-Nsp-0708-3536 (2.0d-26)  | 133 | -REGTIVNVS  | SLMGKVAAPT | MATYSATKFA | ILGFTQALRR | ELAEH--NIR |
| N-7107.p-N-7107-1296 (2.0d-26)      | 133 | -RQGIIVNVS  | SLMGKVAAPT | MATYSATKFA | ILGFTQALRQ | ELAEY--NIQ |
| Npun.p-NpR1019 (4.0d-26)            | 133 | -RQGTIVNVS  | SLMGKVAAPT | MATYSATKFA | ILGFTQALRR | ELAEH--NIR |
| N-7524.p-N-7524-4265 (1.0d-25)      | 133 | -RQGTIIIVS  | SLMGKVAAPT | MATYSATKFA | ILGFTQALRR | ELAEY--NIQ |
| M7126-SCAD-E                        | 133 | -KQGRIVNVS  | SLMGKIAAPT | MATYSATKFA | ILGFTQALRR | ELAQH--NIQ |
| R7116-SCAD-E                        | 137 | -NQGTIVNVS  | SLMGKVAAPT | MSTYSATKFA | ILGFTEALRR | ELAPH--NIK |
| cyt.p-cce_3588 (3.0d-27)            | 139 | -QQGTIVNVS  | SLMGKIAAPT | MATYSATKFA | LLGFTQALRG | ELAPY--NIR |
| ctc.p-c0110?06289 (2.0d-26)         | 138 | -KQGTIVNVS  | SLMGKIAAPT | MATYSATKFA | LLGFTQALRG | ELAPY--NIR |
| cyr.p-c8801?0598 (2.0d-26)          | 133 | -QQGTIVNVS  | SLMGKIAAPT | MATYSATKFA | LLGFTEALRG | ELAPY--NIR |
| Amar.p-AM1_6363 (1.0d-30)           | 133 | -KEGRIVNVS  | SLMGKIGAPT | MATYSATKFA | ILGFTQALRT | ELAAH--NIK |
| Amar.p-AM1_0210 (1.0d-27)           | 135 | -RAGTIVNVS  | SLMGKLAAPT | YSTYSATKFA | LLGMTQSLRM | ELASY--NVQ |
| lyn.p-l8106?00785 (4.0d-31)         | 129 | -KKGTIVNVG  | SVGGKMPLPD | MTAYCASKYA | VTGLTETLRL | ELDPK--GIN |
| ter.p-Tery_3453 (8.0d-31)           | 129 | -KSGTIIINVG | SFGGKMPLPQ | MTAYCASKYA | VTGLTDTLRL | ELQSK--GIN |
| A29413.p-Ava0943 (1.0d-30)          | 150 | -CAGTIVNVS  | SIGGLEPIPY | HVPYTASKYA | ITGLTKSLHA | ELSPK--GIH |
| A7120.p-A112963 (5.0d-29)           | 150 | -GAGTIVNVS  | SIGGLEPIPY | HVPYTASKYA | ITGLTKSLHA | ELSPK--NIH |
| Npun.p-NpR4797 (3.0d-30)            | 130 | -RSGTIVNLS  | SIGGKVPSAY | LVPYCTSKFG | VTGLTESLQV | ELQPK--GIH |
| Cyl-7417.p-Cyl-7417-4424 (3.0d-30)  | 130 | -GSGTIVNLS  | SIGGKVPTAY | LVAYCTSKFG | VTGLTEALQA | ELQPK--GIH |
| MAST-10914-SCAD-E                   | 130 | -KSGTIVNLS  | SIGGKVPTPY | VVYCTSKFA  | VTGLTESLHA | ELQPK--GIH |
| M7126-SCAD-C                        | 130 | -GSGTIVNVS  | SIGGKVPTPY | LVPYCTSKFA | VTGLTEALQT | ELKPK--GIH |
| R7116-SCAD-D                        | 128 | -SAGTIVNVG  | SIGGKLPLPE | MTVYCTSKYA | ITGLTETLRL | ELKPK--NIH |
| Npun.p-NpF0199 (2.0d-29)            | 165 | -HQGRIVNIS  | SIGGKVVFPF | MLPYCASKFA | LTGLSEGMRA | ELAQE--GIS |
| A7120.p-Alr5358 (3.0d-156)          | 133 | -GSGRIVNIA  | SLAGKKGVAF | NSVYSASKAG | LIMWTDAMRQ | ELVGT--GVN |
| A29413.p-Ava2596 (8.0d-151)         | 133 | -GSGRIVNIA  | SLAGKKGVAF | NSVYSASKAG | LIMWTDAMRQ | ELVGT--GVN |
| N-7524.p-N-7524-5224 (2.0d-121)     | 133 | -GSGRIVNIA  | SLAGKKGIAF | NSIYSASKAS | LIMWTDAVRQ | ELAGS--GVH |
| Cyl-7417.p-Cyl-7417-1544 (2.0d-100) | 133 | -DSGHIVNIA  | SLAGKKGVFY | NSIYSATKAG | LIWTDALRQ  | ELAST--GMN |
| MAST-10914-SCAD-A                   | 133 | -NSGHIVNIS  | SGSGKKGAPY | NSIYSASKAG | MIMWTDMSRQ | ELTNT--NVG |
| N-7524.p-N-7524-5355 (2.0d-74)      | 133 | -NSGHIVNIA  | SGSGKKGAPY | NSIYSASKAG | LIMWTDAVRQ | ELADT--KVN |
| Npun.p-NpF3363 (2.0d-81)            | 133 | -NSGHIVNIA  | SLAAKKGHPY | DSIYSASKAG | LLMWSDAVRQ | ELADT--GVE |
| R7116-SCAD-A                        | 146 | -ASGHIINIA  | SLTGKKGLAY | DSIYSASKAG | LITWADALKQ | ELANT--NIK |
| cyr.p-c8801?3820 (4.0d-26)          | 131 | -GSGGIINVA  | SIAAFQPLPY | LSVYAATKAF | VLSLSEALWA | ENKDT--GVN |
| A7120.p-A111418 (8.0d-26)           | 141 | --QQQLVAIS  | SICGKTGVPT | RTGYVASKHA | MQGFFDTLRI | ELHST--GVD |
| consensus                           | 201 | * ::        | * .        | * :*       | :          | :          |

|                              |           |     |            |            |       |       |       |
|------------------------------|-----------|-----|------------|------------|-------|-------|-------|
| A7120.p-Alr1894              | (1.0d-26) | 185 | VNAVAPGFIA | TDMTSNLK-- | ----- | ----- | ----- |
| A29413.p-Ava3764             | (1.0d-26) | 185 | VNAVAPGFIA | TDMTSNLK-- | ----- | ----- | ----- |
| N-7524.p-N-7524-0010         | (9.0d-30) | 185 | VNAIAPGFIA | TDMTSDLK-- | ----- | ----- | ----- |
| M7126-SCAD-B                 |           | 188 | VNAVAPGFIS | TDMTSNLSN- | ----- | ----- | ----- |
| nod.p-n9414?22428            | (4.0d-28) | 181 | VNAVAPGFIA | TDMTSSLSN- | ----- | ----- | ----- |
| MAST-10914-SCAD-B            |           | 188 | VNAVAPGFIA | TDMTSNLNN- | ----- | ----- | ----- |
| Cal-6303.p-Cal-6303-1520     | (5.0d-28) | 188 | VNAVAPGFIA | TDMTSNLGN- | ----- | ----- | ----- |
| Npun.p-NpF2349               | (4.0d-29) | 181 | VNAVAPGFIT | TDMTSDLNN- | ----- | ----- | ----- |
| N-7107.p-N-7107-0937         | (1.0d-27) | 188 | VNAVAPGFIT | TDMTSNLSN- | ----- | ----- | ----- |
| Ana-90.p-ana90-1712          | (1.0d-28) | 181 | VNAVAPGFIT | TDMTSDIK-- | ----- | ----- | ----- |
| Acyl-7122.p-acyl-4545        | (9.0d-28) | 181 | VNAVAPGFIT | TDMTSDIK-- | ----- | ----- | ----- |
| Nsp-0708.p-Nsp-0708-2353     | (9.0d-27) | 181 | VNAVAPGFIT | TDMTSNIA-- | ----- | ----- | ----- |
| Cyl-505.p-Cyl-505-0204       | (2.0d-28) | 181 | VNAVAPGFIQ | TDMTSEIK-- | ----- | ----- | ----- |
| Cyl-7417.p-Cyl-7417-2349     | (6.0d-29) | 188 | ANAVAPGFIT | TDMTNDLK-- | ----- | ----- | ----- |
| R7116-SCAD-C                 |           | 188 | VNAVSPGFIE | TDMTSELK-- | ----- | ----- | ----- |
| ter.p-Tery_3438              | (2.0d-28) | 188 | ANVVAPGFIE | TDMTKDLKN- | ----- | ----- | ----- |
| lyn.p-l8106?21814            | (1.0d-27) | 188 | VNAVAPGFIE | TDMTKDLKN- | ----- | ----- | ----- |
| Amar.p-AM1_5632              | (1.0d-26) | 181 | VNAVAPGFIA | TDMTEGLG-- | ----- | ----- | ----- |
| cyr.p-c8801?2930             | (1.0d-28) | 184 | VNAVAPGFIT | TDMTSDIK-- | ----- | ----- | ----- |
| S6803.p-Slr0886              | (4.0d-27) | 181 | VNAVAPGFIA | TDMTENLN-- | ----- | ----- | ----- |
| mae.p-MAE_33900              | (3.0d-29) | 188 | VNAVAPGFIE | TDMTHDLK-- | ----- | ----- | ----- |
| TeBP1.p-tlr1502              | (5.0d-29) | 179 | VNAVAPGFIA | TEMTAELK-- | ----- | ----- | ----- |
| S7942.p-Synpcc7942_0684      | (4.0d-26) | 183 | VNAVAPGFIA | TDMTSELA-- | ----- | ----- | ----- |
| syx.p-SynWH7803_1861         | (7.0d-30) | 184 | VNAVAPGFIA | TDMTKDLD-- | ----- | ----- | ----- |
| S7805.p-WH7805_13603         | (5.0d-28) | 184 | VNAVAPGFIA | TDMTKDLD-- | ----- | ----- | ----- |
| S9916.p-RS9916_33507         | (8.0d-31) | 184 | VNAVAPGFIA | TDMTKDLD-- | ----- | ----- | ----- |
| Ssp-RS9917.p-Ssp-RS9917-1614 | (2.0d-29) | 242 | VNAVAPGFIA | TDMTKDLD-- | ----- | ----- | ----- |
| S9917.p-RS9917_09056         | (3.0d-29) | 184 | VNAVAPGFIA | TDMTKDLD-- | ----- | ----- | ----- |
| syg.p-sync_2137              | (4.0d-29) | 184 | VNAVAPGFIA | TDMTKDLE-- | ----- | ----- | ----- |
| P9313.p-PMT1333              | (6.0d-29) | 184 | VNAVAPGFIT | TDMTKELD-- | ----- | ----- | ----- |
| pmf.p-P9303_06521            | (1.0d-28) | 196 | VNAVAPGFIT | TDMTKELD-- | ----- | ----- | ----- |
| S107.p-BL107_09856           | (2.0d-28) | 201 | VNAVAPGFIA | TDMTKDLD-- | ----- | ----- | ----- |
| S9902.p-Sync9902_1745        | (4.0d-28) | 184 | VNAVAPGFIA | TDMTKDLD-- | ----- | ----- | ----- |
| S9605.p-Sync9605_0617        | (4.0d-27) | 198 | VNAVAPGFIA | TDMTKDLD-- | ----- | ----- | ----- |
| S8102.p-SynW1852             | (9.0d-28) | 184 | VNAVAPGFIA | TDMTKDLD-- | ----- | ----- | ----- |
| syr.p-SynRCC307_0681         | (2.0d-28) | 184 | VNAVAPGFIA | TDMTKDLA-- | ----- | ----- | ----- |
| S5701.p-WH5701_07809         | (1.0d-28) | 186 | VNAVAPGFIA | SDMTKDLD-- | ----- | ----- | ----- |
| pmn.p-PMN2A_1785             | (5.0d-28) | 184 | VNAVAPGFIS | TDMTKDLN-- | ----- | ----- | ----- |
| pme.p-NATL1_05081            | (1.0d-27) | 184 | VNAVAPGFIS | TDMTKDLD-- | ----- | ----- | ----- |



|                          |           |     |            |            |            |        |       |
|--------------------------|-----------|-----|------------|------------|------------|--------|-------|
| pmz.p-p9211?06582        | (1.0d-27) | 184 | VNAVAPGFIE | TDMTKDLD-- | -----      | -----  | ----- |
| PRO1375.p-Pro0452        | (7.0d-27) | 184 | VNAVAPGFIE | TDMTKELD-- | -----      | -----  | ----- |
| Gvi.p-glr3506            | (5.0d-28) | 182 | VNAVAPGFIA | TDMTSALE-- | -----      | -----  | ----- |
| pmb.p-P9601_05091        | (9.0d-28) | 184 | VNAIAPGFIE | TEMTEKLN-- | -----      | -----  | ----- |
| pmi.p-PMT9312_0453       | (1.0d-27) | 184 | VNAIAPGFIE | TEMTEKLN-- | -----      | -----  | ----- |
| pmg.p-P9301_04781        | (1.0d-27) | 184 | VNAIAPGFIE | TEMTEKLN-- | -----      | -----  | ----- |
| PMED4.p-PMM0453          | (9.0d-28) | 184 | VNAIAPGFIE | TEMTEKLN-- | -----      | -----  | ----- |
| pmc.p-P9515_05161        | (2.0d-27) | 184 | VNAIAPGFIE | TEMTEKLN-- | -----      | -----  | ----- |
| Npun.p-NpR0578           | (6.0d-27) | 186 | INAVCPGYID | TSMMDRFTGG | T-----     | -----  | ----- |
| Cyl-7417.p-Cyl-7417-0303 | (5.0d-26) | 180 | VNAVSPGPIV | TPTLTEIMLQ | IGSMQGWGTD | -----  | ----- |
| Npun.p-NpF2231           | (1.0d-26) | 181 | VNALCLAGVK | TDMGKELK-- | -----      | -----  | ----- |
| Cyl-7417.p-Cyl-7417-3400 | (1.0d-26) | 181 | VNALCPAGVK | TDMGKTL--  | -----      | -----  | ----- |
| Acyl-7122.p-acyl-3225    | (4.0d-28) | 180 | VTAICPGSVN | TEIWDTAT-- | -----      | -----  | ----- |
| Nsp-0708.p-Nsp-0708-2459 | (6.0d-26) | 180 | VIAICPGSVN | TEIWDTET-- | -----      | -----  | ----- |
| Ana-90.p-ana90-1189      | (1.0d-28) | 180 | VIAICPGSVN | TEIWDTPT-- | -----      | -----  | ----- |
| Cyl-505.p-Cyl-505-2036   | (2.0d-32) | 180 | VSAICPGAVN | TEIWDTET-- | -----      | -----  | ----- |
| A29413.p-Ava2536         | (2.0d-28) | 180 | VSAICPGAVN | TGLWDTET-- | -----      | -----  | ----- |
| A7120.p-Alr5286          | (2.0d-28) | 194 | VTAICPGAVN | TGLWDTET-- | -----      | -----  | ----- |
| N-7524.p-N-7524-4179     | (1.0d-27) | 180 | VTTICPGSVN | TGLWDTET-- | -----      | -----  | ----- |
| MAST-10914-SCAD-C        |           | 184 | VIAICPGAVN | TELWDTET-- | -----      | -----  | ----- |
| Cyl-7417.p-Cyl-7417-1063 | (4.0d-30) | 180 | VTAICPGAVN | TELWDTET-- | -----      | -----  | ----- |
| nod.p-n9414?21215        | (5.0d-26) | 179 | VTAICPGAVN | TELWDTET-- | -----      | -----  | ----- |
| N-7107.p-N-7107-1008     | (2.0d-29) | 180 | VTAICPGSVN | TEIWDTDT-- | -----      | -----  | ----- |
| M7126-SCAD-A             |           | 180 | VTAVCPGAVN | TGLWDTET-- | -----      | -----  | ----- |
| R7116-SCAD-B             |           | 179 | VTAICPGAVN | TEIWDTKT-- | -----      | -----  | ----- |
| lyn.p-l8106?23630        | (2.0d-26) | 180 | VTAICPGAVN | TPLWDTET-- | -----      | -----  | ----- |
| Amar.p-AM1_5634          | (3.0d-27) | 180 | VTAVCPGAVN | TPLWDTDT-- | -----      | -----  | ----- |
| cyb.p-CYB_0189           | (1.0d-27) | 182 | VTSLCPGAVD | TSLWDTGT-- | -----      | -----  | ----- |
| cya.p-CYA_2793           | (8.0d-26) | 182 | VTSLCLGAVD | TPLWDT---  | -----      | -----  | ----- |
| M7126-SCAD-D             |           | 179 | VTSFCPGGMN | TAFWQTPD-- | -----      | -----  | ----- |
| cyb.p-CYB_0005           | (4.0d-34) | 180 | VILIEPGPVA | TEFGRVAEET | FAAVVNP--  | -----  | ----- |
| cya.p-CYA_0005           | (2.0d-33) | 180 | VIVIEPGPVA | TEFGRVAEET | FAAVVNP--  | -----  | ----- |
| N-7107.p-N-7107-5182     | (3.0d-28) | 181 | VTIIEPGLVE | TEINNHVTD  | VAKKN----  | -----  | ----- |
| Npun.p-NpR3707           | (3.0d-27) | 181 | VTIIEPGLVD | TEIDNQITDP | VAKQR----- | -----  | ----- |
| Acyl-7122.p-acyl-1205    | (2.0d-26) | 206 | VTIIEPGLVE | TEIDQHITDI | VAKQE----- | -----  | ----- |
| R7116-SCAD-F             |           | 193 | VSSVDPGLVE | TEFS-QVRFH | GDDEK----- | -----  | ----- |
| Npun.p-NpF0204           | (3.0d-28) | 188 | VTLIHPGRID | TPYNEHARSY | MPKQPAHRGM | I----- | ----- |
| MAST-10914-SCAD-D        |           | 180 | VIALLPSTLD | TDMVRELQWF | R-----     | -----  | ----- |
| Cal-6303.p-Cal-6303-3407 | (1.0d-27) | 180 | VLGLLPSTLD | TDMVRDLKWF | R-----     | -----  | ----- |
| Ana-90.p-ana90-4359      | (1.0d-27) | 180 | VIALLPSTLE | TDMVRDLQSF | R-----     | -----  | ----- |

|                                     |     |             |            |            |            |            |
|-------------------------------------|-----|-------------|------------|------------|------------|------------|
| Cyl-7417.p-Cyl-7417-4762 (6.0d-27)  | 180 | VIALLPRTLTD | TDMVRDLQLF | R-----     | -----      | -----      |
| Nsp-0708.p-Nsp-0708-3536 (2.0d-26)  | 180 | VVALLPRTLTD | TDMVRDLKLF | R-----     | -----      | -----      |
| N-7107.p-N-7107-1296 (2.0d-26)      | 180 | VKALLPSLTD  | TDMVRDLQLF | R-----     | -----      | -----      |
| Npun.p-NpR1019 (4.0d-26)            | 180 | VIALLPSSLTD | TDMVRDLKLF | R-----     | -----      | -----      |
| N-7524.p-N-7524-4265 (1.0d-25)      | 180 | VKALLPSLTD  | TDMVRDFKLF | R-----     | -----      | -----      |
| M7126-SCAD-E                        | 180 | VQALLPRTLTD | TDMVRDFQNF | R-----     | -----      | -----      |
| R7116-SCAD-E                        | 184 | VVSLLPRTLTD | TDMVRDLELY | R-----     | -----      | -----      |
| cyt.p-cce_3588 (3.0d-27)            | 186 | VVALLPSLTD  | TDMVRGLDWF | R-----     | -----      | -----      |
| ctc.p-c0110?06289 (2.0d-26)         | 185 | VIALLPSSLTD | TDMIQGLDWF | R-----     | -----      | -----      |
| cyr.p-c8801?0598 (2.0d-26)          | 180 | VVALLPSLTD  | TDMIADLEWF | R-----     | -----      | -----      |
| Amar.p-AM1_6363 (1.0d-30)           | 180 | VTALLPSLTE  | TDMTRNTQRF | R-----     | -----      | -----      |
| Amar.p-AM1_0210 (1.0d-27)           | 182 | VVALLPRTLTE | TDMVQNTDKF | A-----     | -----      | -----      |
| lyn.p-l8106?00785 (4.0d-31)         | 176 | VCAVHPGVIN  | SNFMERAQFR | GEN-----   | -----      | -----      |
| ter.p-Tery_3453 (8.0d-31)           | 176 | ISSVQPGVIN  | SNFMERAKFR | GGD-----   | -----      | -----      |
| A29413.p-Ava0943 (1.0d-30)          | 197 | VSGIYPSFIS  | TQLMERAIFR | GKD-----   | -----      | -----      |
| A7120.p-A112963 (5.0d-29)           | 197 | VSGIYPSFIS  | TQLMERAIFR | GKD-----   | -----      | -----      |
| Npun.p-NpR4797 (3.0d-30)            | 177 | VCGIYPNLIK  | STLMERAVFR | QGD-----   | -----      | -----      |
| Cyl-7417.p-Cyl-7417-4424 (3.0d-30)  | 177 | VCGIYPNLIK  | SSLMERAIFR | GKD-----   | -----      | -----      |
| MAST-10914-SCAD-E                   | 177 | VCGIYPNLIK  | SSLMERAIFR | GSD-----   | -----      | -----      |
| M7126-SCAD-C                        | 177 | VCGIYPNLIK  | SSFMERAVFR | GKD-----   | -----      | -----      |
| R7116-SCAD-D                        | 175 | VSAVHPSATN  | SNFMERAQFR | GSS-----   | -----      | -----      |
| Npun.p-NpF0199 (2.0d-29)            | 212 | VTTVCPGLIR  | TGAPENVIFK | GQHRKEYAWF | SISDSLPLLS | MSAEVVAYKT |
| A7120.p-Alr5358 (3.0d-156)          | 180 | ISVVCPGYVS  | QTGMTVDTRV | S-----     | -----      | -----      |
| A29413.p-Ava2596 (8.0d-151)         | 180 | ISVVCPGYVS  | QTGMTVDTRV | S-----     | -----      | -----      |
| N-7524.p-N-7524-5224 (2.0d-121)     | 180 | ISAVCPGYVS  | HTGMTVDPRV | P-----     | -----      | -----      |
| Cyl-7417.p-Cyl-7417-1544 (2.0d-100) | 180 | ISVICPGYIS  | ETGMTFDSRI | P-----     | -----      | -----      |
| MAST-10914-SCAD-A                   | 180 | VSVVCPGYTS  | AG-MFVNFGL | P-----     | -----      | -----      |
| N-7524.p-N-7524-5355 (2.0d-74)      | 180 | ISVVCPGYTA  | AG-MFFAFGL | P-----     | -----      | -----      |
| Npun.p-NpF3363 (2.0d-81)            | 180 | ISTICPGYIA  | EQGMLADTGI | P-----     | -----      | -----      |
| R7116-SCAD-A                        | 193 | ISNICPESIS  | EQASFADTGI | S-----     | -----      | -----      |
| cyr.p-c8801?3820 (4.0d-26)          | 178 | ILALCPGPTE  | SNFFKVADFP | -----      | -----      | -----      |
| A7120.p-A111418 (8.0d-26)           | 187 | VLVVSPGFVA  | TDIRQALGA  | D-----     | -----      | -----      |
| consensus                           | 251 | .           | .          |            |            |            |

|                              |           |     |       |       |       |       |       |
|------------------------------|-----------|-----|-------|-------|-------|-------|-------|
| A7120.p-Alr1894              | (1.0d-26) | 202 | ----- | ----- | ----- | ----- | ----- |
| A29413.p-Ava3764             | (1.0d-26) | 202 | ----- | ----- | ----- | ----- | ----- |
| N-7524.p-N-7524-0010         | (9.0d-30) | 202 | ----- | ----- | ----- | ----- | ----- |
| M7126-SCAD-B                 |           | 206 | ----- | ----- | ----- | ----- | ----- |
| nod.p-n9414?22428            | (4.0d-28) | 199 | ----- | ----- | ----- | ----- | ----- |
| MAST-10914-SCAD-B            |           | 206 | ----- | ----- | ----- | ----- | ----- |
| Cal-6303.p-Cal-6303-1520     | (5.0d-28) | 206 | ----- | ----- | ----- | ----- | ----- |
| Npun.p-NpF2349               | (4.0d-29) | 199 | ----- | ----- | ----- | ----- | ----- |
| N-7107.p-N-7107-0937         | (1.0d-27) | 206 | ----- | ----- | ----- | ----- | ----- |
| Ana-90.p-ana90-1712          | (1.0d-28) | 198 | ----- | ----- | ----- | ----- | ----- |
| Acyl-7122.p-acyl-4545        | (9.0d-28) | 198 | ----- | ----- | ----- | ----- | ----- |
| Nsp-0708.p-Nsp-0708-2353     | (9.0d-27) | 198 | ----- | ----- | ----- | ----- | ----- |
| Cyl-505.p-Cyl-505-0204       | (2.0d-28) | 198 | ----- | ----- | ----- | ----- | ----- |
| Cyl-7417.p-Cyl-7417-2349     | (6.0d-29) | 205 | ----- | ----- | ----- | ----- | ----- |
| R7116-SCAD-C                 |           | 205 | ----- | ----- | ----- | ----- | ----- |
| ter.p-Tery_3438              | (2.0d-28) | 206 | ----- | ----- | ----- | ----- | ----- |
| lyn.p-l8106?21814            | (1.0d-27) | 206 | ----- | ----- | ----- | ----- | ----- |
| Amar.p-AM1_5632              | (1.0d-26) | 198 | ----- | ----- | ----- | ----- | ----- |
| cyr.p-c8801?2930             | (1.0d-28) | 201 | ----- | ----- | ----- | ----- | ----- |
| S6803.p-Slr0886              | (4.0d-27) | 198 | ----- | ----- | ----- | ----- | ----- |
| mae.p-MAE_33900              | (3.0d-29) | 205 | ----- | ----- | ----- | ----- | ----- |
| TeBP1.p-tlr1502              | (5.0d-29) | 196 | ----- | ----- | ----- | ----- | ----- |
| S7942.p-Synpcc7942_0684      | (4.0d-26) | 200 | ----- | ----- | ----- | ----- | ----- |
| syx.p-SynWH7803_1861         | (7.0d-30) | 201 | ----- | ----- | ----- | ----- | ----- |
| S7805.p-WH7805_13603         | (5.0d-28) | 201 | ----- | ----- | ----- | ----- | ----- |
| S9916.p-RS9916_33507         | (8.0d-31) | 201 | ----- | ----- | ----- | ----- | ----- |
| Ssp-RS9917.p-Ssp-RS9917-1614 | (2.0d-29) | 259 | ----- | ----- | ----- | ----- | ----- |
| S9917.p-RS9917_09056         | (3.0d-29) | 201 | ----- | ----- | ----- | ----- | ----- |
| syg.p-sync_2137              | (4.0d-29) | 201 | ----- | ----- | ----- | ----- | ----- |
| P9313.p-PMT1333              | (6.0d-29) | 201 | ----- | ----- | ----- | ----- | ----- |
| pmf.p-P9303_06521            | (1.0d-28) | 213 | ----- | ----- | ----- | ----- | ----- |
| S107.p-BL107_09856           | (2.0d-28) | 218 | ----- | ----- | ----- | ----- | ----- |
| S9902.p-Sync9902_1745        | (4.0d-28) | 201 | ----- | ----- | ----- | ----- | ----- |
| S9605.p-Sync9605_0617        | (4.0d-27) | 215 | ----- | ----- | ----- | ----- | ----- |
| S8102.p-SynW1852             | (9.0d-28) | 201 | ----- | ----- | ----- | ----- | ----- |
| syr.p-SynRCC307_0681         | (2.0d-28) | 201 | ----- | ----- | ----- | ----- | ----- |
| S5701.p-WH5701_07809         | (1.0d-28) | 203 | ----- | ----- | ----- | ----- | ----- |
| pmn.p-PMN2A_1785             | (5.0d-28) | 201 | ----- | ----- | ----- | ----- | ----- |
| pme.p-NATL1_05081            | (1.0d-27) | 201 | ----- | ----- | ----- | ----- | ----- |

|                          |           |     |       |       |       |       |       |
|--------------------------|-----------|-----|-------|-------|-------|-------|-------|
| pmz.p-p9211?06582        | (1.0d-27) | 201 | ----- | ----- | ----- | ----- | ----- |
| PRO1375.p-Pro0452        | (7.0d-27) | 201 | ----- | ----- | ----- | ----- | ----- |
| Gvi.p-glr3506            | (5.0d-28) | 199 | ----- | ----- | ----- | ----- | ----- |
| pmb.p-P9601_05091        | (9.0d-28) | 201 | ----- | ----- | ----- | ----- | ----- |
| pmi.p-PMT9312_0453       | (1.0d-27) | 201 | ----- | ----- | ----- | ----- | ----- |
| pmg.p-P9301_04781        | (1.0d-27) | 201 | ----- | ----- | ----- | ----- | ----- |
| PMED4.p-PMM0453          | (9.0d-28) | 201 | ----- | ----- | ----- | ----- | ----- |
| pmc.p-P9515_05161        | (2.0d-27) | 201 | ----- | ----- | ----- | ----- | ----- |
| Npun.p-NpR0578           | (6.0d-27) | 206 | ----- | ----- | ----- | ----- | ----- |
| Cyl-7417.p-Cyl-7417-0303 | (5.0d-26) | 209 | ----- | ----- | ----- | ----- | ----- |
| Npun.p-NpF2231           | (1.0d-26) | 198 | ----- | ----- | ----- | ----- | ----- |
| Cyl-7417.p-Cyl-7417-3400 | (1.0d-26) | 198 | ----- | ----- | ----- | ----- | ----- |
| Acyl-7122.p-acyl-3225    | (4.0d-28) | 197 | ----- | ----- | ----- | ----- | ----- |
| Nsp-0708.p-Nsp-0708-2459 | (6.0d-26) | 197 | ----- | ----- | ----- | ----- | ----- |
| Ana-90.p-ana90-1189      | (1.0d-28) | 197 | ----- | ----- | ----- | ----- | ----- |
| Cyl-505.p-Cyl-505-2036   | (2.0d-32) | 197 | ----- | ----- | ----- | ----- | ----- |
| A29413.p-Ava2536         | (2.0d-28) | 197 | ----- | ----- | ----- | ----- | ----- |
| A7120.p-Alr5286          | (2.0d-28) | 211 | ----- | ----- | ----- | ----- | ----- |
| N-7524.p-N-7524-4179     | (1.0d-27) | 197 | ----- | ----- | ----- | ----- | ----- |
| MAST-10914-SCAD-C        |           | 201 | ----- | ----- | ----- | ----- | ----- |
| Cyl-7417.p-Cyl-7417-1063 | (4.0d-30) | 197 | ----- | ----- | ----- | ----- | ----- |
| nod.p-n9414?21215        | (5.0d-26) | 196 | ----- | ----- | ----- | ----- | ----- |
| N-7107.p-N-7107-1008     | (2.0d-29) | 197 | ----- | ----- | ----- | ----- | ----- |
| M7126-SCAD-A             |           | 197 | ----- | ----- | ----- | ----- | ----- |
| R7116-SCAD-B             |           | 196 | ----- | ----- | ----- | ----- | ----- |
| lyn.p-18106?23630        | (2.0d-26) | 197 | ----- | ----- | ----- | ----- | ----- |
| Amar.p-AM1_5634          | (3.0d-27) | 197 | ----- | ----- | ----- | ----- | ----- |
| cyb.p-CYB_0189           | (1.0d-27) | 199 | ----- | ----- | ----- | ----- | ----- |
| cya.p-CYA_2793           | (8.0d-26) | 197 | ----- | ----- | ----- | ----- | ----- |
| M7126-SCAD-D             |           | 196 | ----- | ----- | ----- | ----- | ----- |
| cyb.p-CYB_0005           | (4.0d-34) | 207 | ----- | ----- | ----- | ----- | ----- |
| cya.p-CYA_0005           | (2.0d-33) | 207 | ----- | ----- | ----- | ----- | ----- |
| N-7107.p-N-7107-5182     | (3.0d-28) | 205 | ----- | ----- | ----- | ----- | ----- |
| Npun.p-NpR3707           | (3.0d-27) | 205 | ----- | ----- | ----- | ----- | ----- |
| Acyl-7122.p-acyl-1205    | (2.0d-26) | 230 | ----- | ----- | ----- | ----- | ----- |
| R7116-SCAD-F             |           | 216 | ----- | ----- | ----- | ----- | ----- |
| Npun.p-NpF0204           | (3.0d-28) | 218 | ----- | ----- | ----- | ----- | ----- |
| MAST-10914-SCAD-D        |           | 200 | ----- | ----- | ----- | ----- | ----- |
| Cal-6303.p-Cal-6303-3407 | (1.0d-27) | 200 | ----- | ----- | ----- | ----- | ----- |
| Ana-90.p-ana90-4359      | (1.0d-27) | 200 | ----- | ----- | ----- | ----- | ----- |

|                          |            |     |            |            |            |            |            |
|--------------------------|------------|-----|------------|------------|------------|------------|------------|
| Cyl-7417.p-Cyl-7417-4762 | (6.0d-27)  | 200 | -----      | -----      | -----      | -----      | -----      |
| Nsp-0708.p-Nsp-0708-3536 | (2.0d-26)  | 200 | -----      | -----      | -----      | -----      | -----      |
| N-7107.p-N-7107-1296     | (2.0d-26)  | 200 | -----      | -----      | -----      | -----      | -----      |
| Npun.p-NpR1019           | (4.0d-26)  | 200 | -----      | -----      | -----      | -----      | -----      |
| N-7524.p-N-7524-4265     | (1.0d-25)  | 200 | -----      | -----      | -----      | -----      | -----      |
| M7126-SCAD-E             |            | 200 | -----      | -----      | -----      | -----      | -----      |
| R7116-SCAD-E             |            | 204 | -----      | -----      | -----      | -----      | -----      |
| cyt.p-cce_3588           | (3.0d-27)  | 206 | -----      | -----      | -----      | -----      | -----      |
| ctc.p-c0110?06289        | (2.0d-26)  | 205 | -----      | -----      | -----      | -----      | -----      |
| cyr.p-c8801?0598         | (2.0d-26)  | 200 | -----      | -----      | -----      | -----      | -----      |
| Amar.p-AM1_6363          | (1.0d-30)  | 200 | -----      | -----      | -----      | -----      | -----      |
| Amar.p-AM1_0210          | (1.0d-27)  | 202 | -----      | -----      | -----      | -----      | -----      |
| lyn.p-l8106?00785        | (4.0d-31)  | 198 | -----      | -----      | -----      | -----      | -----      |
| ter.p-Tery_3453          | (8.0d-31)  | 198 | -----      | -----      | -----      | -----      | -----      |
| A29413.p-Ava0943         | (1.0d-30)  | 219 | -----      | -----      | -----      | -----      | -----      |
| A7120.p-Al12963          | (5.0d-29)  | 219 | -----      | -----      | -----      | -----      | -----      |
| Npun.p-NpR4797           | (3.0d-30)  | 199 | -----      | -----      | -----      | -----      | -----      |
| Cyl-7417.p-Cyl-7417-4424 | (3.0d-30)  | 199 | -----      | -----      | -----      | -----      | -----      |
| MAST-10914-SCAD-E        |            | 199 | -----      | -----      | -----      | -----      | -----      |
| M7126-SCAD-C             |            | 199 | -----      | -----      | -----      | -----      | -----      |
| R7116-SCAD-D             |            | 197 | -----      | -----      | -----      | -----      | -----      |
| Npun.p-NpF0199           | (2.0d-29)  | 262 | IAALKRGDAE | IILSLPAQIA | TRFHGLFPGL | NTNLLTWVNW | LLPAASGGIG |
| A7120.p-Alr5358          | (3.0d-156) | 200 | -----      | -----      | -----      | -----      | -----      |
| A29413.p-Ava2596         | (8.0d-151) | 200 | -----      | -----      | -----      | -----      | -----      |
| N-7524.p-N-7524-5224     | (2.0d-121) | 200 | -----      | -----      | -----      | -----      | -----      |
| Cyl-7417.p-Cyl-7417-1544 | (2.0d-100) | 200 | -----      | -----      | -----      | -----      | -----      |
| MAST-10914-SCAD-A        |            | 199 | -----      | -----      | -----      | -----      | -----      |
| N-7524.p-N-7524-5355     | (2.0d-74)  | 199 | -----      | -----      | -----      | -----      | -----      |
| Npun.p-NpF3363           | (2.0d-81)  | 200 | -----      | -----      | -----      | -----      | -----      |
| R7116-SCAD-A             |            | 213 | -----      | -----      | -----      | -----      | -----      |
| cyr.p-c8801?3820         | (4.0d-26)  | 197 | -----      | -----      | -----      | -----      | -----      |
| A7120.p-Al11418          | (8.0d-26)  | 207 | -----      | -----      | -----      | -----      | -----      |
| consensus                |            | 301 | -----      | -----      | -----      | -----      | -----      |

|                              |           |     |       |       |       |            |            |
|------------------------------|-----------|-----|-------|-------|-------|------------|------------|
| A7120.p-Alr1894              | (1.0d-26) | 203 | ----- | ----- | ----- | -SEGILQ--- | YIPLGRYG-- |
| A29413.p-Ava3764             | (1.0d-26) | 203 | ----- | ----- | ----- | -SEGILQ--- | YIPLGRYG-- |
| N-7524.p-N-7524-0010         | (9.0d-30) | 203 | ----- | ----- | ----- | -ADEILK--- | YIPLGRYG-- |
| M7126-SCAD-B                 |           | 207 | ----- | ----- | ----- | -TEEILK--- | YIPLGRYG-- |
| nod.p-n9414?22428            | (4.0d-28) | 200 | ----- | ----- | ----- | -TEDILK--- | YIPLGRYG-- |
| MAST-10914-SCAD-B            |           | 207 | ----- | ----- | ----- | -TEEILK--- | YIPLGRYG-- |
| Cal-6303.p-Cal-6303-1520     | (5.0d-28) | 207 | ----- | ----- | ----- | -TEEIIK--- | FIPLGRYG-- |
| Npun.p-NpF2349               | (4.0d-29) | 200 | ----- | ----- | ----- | -PEDILK--- | YIPLGRFG-- |
| N-7107.p-N-7107-0937         | (1.0d-27) | 207 | ----- | ----- | ----- | -TEEILK--- | FIPLGRYG-- |
| Ana-90.p-ana90-1712          | (1.0d-28) | 199 | ----- | ----- | ----- | -ADGILQ--- | YIPLGRFG-- |
| Acyl-7122.p-acyl-4545        | (9.0d-28) | 199 | ----- | ----- | ----- | -ADNILQ--- | FIPLGRYG-- |
| Nsp-0708.p-Nsp-0708-2353     | (9.0d-27) | 199 | ----- | ----- | ----- | -AEGILQ--- | YIPLGRFG-- |
| Cyl-505.p-Cyl-505-0204       | (2.0d-28) | 199 | ----- | ----- | ----- | -AEGILQ--- | YIPLGRFG-- |
| Cyl-7417.p-Cyl-7417-2349     | (6.0d-29) | 206 | ----- | ----- | ----- | -ADEILN--- | YIPLGRYG-- |
| R7116-SCAD-C                 |           | 206 | ----- | ----- | ----- | -SEEILK--- | AIPLGRYG-- |
| ter.p-Tery_3438              | (2.0d-28) | 207 | ----- | ----- | ----- | -SEEIIK--- | FIPLGRYG-- |
| lyn.p-l8106?21814            | (1.0d-27) | 207 | ----- | ----- | ----- | -TEEILK--- | FIPLGRYG-- |
| Amar.p-AM1_5632              | (1.0d-26) | 199 | ----- | ----- | ----- | -SEEIIK--- | FIPLGRYG-- |
| cyr.p-c8801?2930             | (1.0d-28) | 202 | ----- | ----- | ----- | -SEEIIK--- | FIPLGRYG-- |
| S6803.p-Slr0886              | (4.0d-27) | 199 | ----- | ----- | ----- | -AEPILQ--- | FIPLARYG-- |
| mae.p-MAE_33900              | (3.0d-29) | 206 | ----- | ----- | ----- | -ADEILK--- | YIPLSRYG-- |
| TeBP1.p-tlr1502              | (5.0d-29) | 197 | ----- | ----- | ----- | -AEDILK--- | FIPLGRYG-- |
| S7942.p-Syncpcc7942_0684     | (4.0d-26) | 201 | ----- | ----- | ----- | -AEKLE---  | VIPLGRYG-- |
| syx.p-SynWH7803_1861         | (7.0d-30) | 202 | ----- | ----- | ----- | -AEGILS--- | AIPLGTFG-- |
| S7805.p-WH7805_13603         | (5.0d-28) | 202 | ----- | ----- | ----- | -SEGILT--- | AIPLGTFG-- |
| S9916.p-RS9916_33507         | (8.0d-31) | 202 | ----- | ----- | ----- | -ADGILA--- | AIPLGSFG-- |
| Ssp-RS9917.p-Ssp-RS9917-1614 | (2.0d-29) | 260 | ----- | ----- | ----- | -AEGILA--- | AIPLGRFG-- |
| S9917.p-RS9917_09056         | (3.0d-29) | 202 | ----- | ----- | ----- | -AEGILA--- | AIPLGRFG-- |
| syg.p-sync_2137              | (4.0d-29) | 202 | ----- | ----- | ----- | -ADAILS--- | AIPLGRFG-- |
| P9313.p-PMT1333              | (6.0d-29) | 202 | ----- | ----- | ----- | -SEPILA--- | AIPLGSFG-- |
| pmf.p-P9303_06521            | (1.0d-28) | 214 | ----- | ----- | ----- | -SEPILA--- | AIPLGSFG-- |
| S107.p-BL107_09856           | (2.0d-28) | 219 | ----- | ----- | ----- | -ATAILK--- | DIPLGTFG-- |
| S9902.p-Sync9902_1745        | (4.0d-28) | 202 | ----- | ----- | ----- | -ATAILK--- | DIPLGTFG-- |
| S9605.p-Sync9605_0617        | (4.0d-27) | 216 | ----- | ----- | ----- | -AEAILK--- | DIPLGTFG-- |
| S8102.p-SynW1852             | (9.0d-28) | 202 | ----- | ----- | ----- | -ADAILK--- | DIPLGQFG-- |
| syr.p-SynRCC307_0681         | (2.0d-28) | 202 | ----- | ----- | ----- | -AEALLN--- | AIPLGRYG-- |
| S5701.p-WH5701_07809         | (1.0d-28) | 204 | ----- | ----- | ----- | -VERIQA--- | AIPLGRLG-- |
| pmn.p-PMN2A_1785             | (5.0d-28) | 202 | ----- | ----- | ----- | -SESILS--- | AIPLGRFG-- |
| pme.p-NATL1_05081            | (1.0d-27) | 202 | ----- | ----- | ----- | -SESILS--- | AIPLGRFG-- |

|                          |           |     |       |       |       |               |             |
|--------------------------|-----------|-----|-------|-------|-------|---------------|-------------|
| pmz.p-p9211?06582        | (1.0d-27) | 202 | ----- | ----- | ----- | -SEQILS---    | AIPLGEFG--  |
| PRO1375.p-Pro0452        | (7.0d-27) | 202 | ----- | ----- | ----- | -AEPILS---    | AIPLGHFG--  |
| Gvi.p-glr3506            | (5.0d-28) | 200 | ----- | ----- | ----- | -LEPILA---    | QVPLRRVG--  |
| pmb.p-P9601_05091        | (9.0d-28) | 202 | ----- | ----- | ----- | -TEEILK---    | VIPLGKLG--  |
| pmi.p-PMT9312_0453       | (1.0d-27) | 202 | ----- | ----- | ----- | -TEEILK---    | VIPLGKLG--  |
| pmg.p-P9301_04781        | (1.0d-27) | 202 | ----- | ----- | ----- | -TEEILK---    | VIPLGKLG--  |
| PMED4.p-PMM0453          | (9.0d-28) | 202 | ----- | ----- | ----- | -NEEI IK---   | AIPLGKLG--  |
| pmc.p-P9515_05161        | (2.0d-27) | 202 | ----- | ----- | ----- | -NEEIVK---    | AIPLGKLG--  |
| Npun.p-NpR0578           | (6.0d-27) | 207 | ----- | ----- | ----- | PE GRQKVVS--- | EEPIGRMG--  |
| Cyl-7417.p-Cyl-7417-0303 | (5.0d-26) | 210 | ----- | ----- | ----- | LKQ IEQHLLKGM | SNPTGRLG--  |
| Npun.p-NpF2231           | (1.0d-26) | 199 | ----- | ----- | ----- | --ETDGN---    | CVNDTYFM--  |
| Cyl-7417.p-Cyl-7417-3400 | (1.0d-26) | 199 | ----- | ----- | ----- | --EADGT---    | PVNDSYFM--  |
| Acyl-7122.p-acyl-3225    | (4.0d-28) | 198 | ----- | ----- | ----- | -VNADFD---    | ---RTKML--  |
| Nsp-0708.p-Nsp-0708-2459 | (6.0d-26) | 198 | ----- | ----- | ----- | -VHVNFDF---   | ---RSKML--  |
| Ana-90.p-ana90-1189      | (1.0d-28) | 198 | ----- | ----- | ----- | -VQANFD---    | ---RSQML--  |
| Cyl-505.p-Cyl-505-2036   | (2.0d-32) | 198 | ----- | ----- | ----- | -VNANFD---    | ---RSKML--  |
| A29413.p-Ava2536         | (2.0d-28) | 198 | ----- | ----- | ----- | -VKADFD---    | ---RSKML--  |
| A7120.p-Alr5286          | (2.0d-28) | 212 | ----- | ----- | ----- | -VKADFD---    | ---RSKML--  |
| N-7524.p-N-7524-4179     | (1.0d-27) | 198 | ----- | ----- | ----- | -VHADFD---    | ---RSQML--  |
| MAST-10914-SCAD-C        |           | 202 | ----- | ----- | ----- | -VNANFD---    | ---RSKML--  |
| Cyl-7417.p-Cyl-7417-1063 | (4.0d-30) | 198 | ----- | ----- | ----- | -VHANLD---    | ---RSKML--  |
| nod.p-n9414?21215        | (5.0d-26) | 197 | ----- | ----- | ----- | -VQSDFD---    | ---RSKML--  |
| N-7107.p-N-7107-1008     | (2.0d-29) | 198 | ----- | ----- | ----- | -VHANFD---    | ---RSKML--  |
| M7126-SCAD-A             |           | 198 | ----- | ----- | ----- | -VNVNFD---    | ---RAKML--  |
| R7116-SCAD-B             |           | 197 | ----- | ----- | ----- | -VNADFD---    | ---RSNML--  |
| lyn.p-18106?23630        | (2.0d-26) | 198 | ----- | ----- | ----- | -VQADFD---    | ---RATML--  |
| Amar.p-AM1_5634          | (3.0d-27) | 198 | ----- | ----- | ----- | -VDADFD---    | ---RSAML--  |
| cyb.p-CYB_0189           | (1.0d-27) | 200 | ----- | ----- | ----- | -VGVNFD---    | ---RSKML--  |
| cya.p-CYA_2793           | (8.0d-26) | 198 | ----- | ----- | ----- | -VQVDFD---    | ---RSKML--  |
| M7126-SCAD-D             |           | 197 | ----- | ----- | ----- | -NQAHQQ---    | ---QAENFM-- |
| cyb.p-CYB_0005           | (4.0d-34) | 208 | ----- | ----- | ----- | ---GPYKA      | ILDKTAELAS  |
| cya.p-CYA_0005           | (2.0d-33) | 208 | ----- | ----- | ----- | ---GPYKA      | ILDKAAELAS  |
| N-7107.p-N-7107-5182     | (3.0d-28) | 206 | ----- | ----- | ----- | ---VEE        | RLKAITPLQS  |
| Npun.p-NpR3707           | (3.0d-27) | 206 | ----- | ----- | ----- | ---IEE        | RRKAITPLHS  |
| Acyl-7122.p-acyl-1205    | (2.0d-26) | 231 | ----- | ----- | ----- | ---IEA        | RRKAIAPLQS  |
| R7116-SCAD-F             |           | 217 | ----- | ----- | ----- | ---AKK        | VYQGLTPLTP  |
| Npun.p-NpF0204           | (3.0d-28) | 219 | ----- | ----- | ----- | ---YPPEA      | VTEAILYAAE  |
| MAST-10914-SCAD-D        |           | 201 | ----- | ----- | ----- | ---WVL        | PTTPQKVAQA  |
| Cal-6303.p-Cal-6303-3407 | (1.0d-27) | 201 | ----- | ----- | ----- | ---WIQ        | PMTTEQVANA  |
| Ana-90.p-ana90-4359      | (1.0d-27) | 201 | ----- | ----- | ----- | ---GVI        | PMTPEQVAQA  |

|                          |            |     |            |            |            |            |            |             |
|--------------------------|------------|-----|------------|------------|------------|------------|------------|-------------|
| Cyl-7417.p-Cyl-7417-4762 | (6.0d-27)  | 201 | -----      | -----      | -----      | -WVV       | PMTPEKVAQV | LVTGLEKN--  |
| Nsp-0708.p-Nsp-0708-3536 | (2.0d-26)  | 201 | -----      | -----      | -----      | -GVT       | PMTPOQVAQA | LMIGLQKD--  |
| N-7107.p-N-7107-1296     | (2.0d-26)  | 201 | -----      | -----      | -----      | -WVI       | PMTPOQVAQA | LIVGLQND--  |
| Npun.p-NpR1019           | (4.0d-26)  | 201 | -----      | -----      | -----      | -WVI       | PMTPOQVAKA | LVAGMQND--  |
| N-7524.p-N-7524-4265     | (1.0d-25)  | 201 | -----      | -----      | -----      | -WVI       | PMTPOQVAKA | LVIGLEKD--  |
| M7126-SCAD-E             |            | 201 | -----      | -----      | -----      | -WVI       | PMTPOQVAQT | LITGLERD--  |
| R7116-SCAD-E             |            | 205 | -----      | -----      | -----      | -GVI       | PMSPEQVAQA | FIKGLQRD--  |
| cyt.p-cce_3588           | (3.0d-27)  | 207 | -----      | -----      | -----      | -FMK       | PVSPKKVAQS | LIKGLQKD--  |
| ctc.p-c0110?06289        | (2.0d-26)  | 206 | -----      | -----      | -----      | -FVK       | PVSPKKVAQS | LIKGLQKN--  |
| cyr.p-c8801?0598         | (2.0d-26)  | 201 | -----      | -----      | -----      | -WMK       | PVSPKKVAQA | LVKGLQHN--  |
| Amar.p-AM1_6363          | (1.0d-30)  | 201 | -----      | -----      | -----      | -WVA       | AMTPEKVAKV | LVNSLAKE--  |
| Amar.p-AM1_0210          | (1.0d-27)  | 203 | -----      | -----      | -----      | -WVI       | ASSPSDVAKA | FVKGLRSG--  |
| lyn.p-l8106?00785        | (4.0d-31)  | 199 | -----      | -----      | -----      | -NSE       | VENRRQQMQS | VLESSFVS--  |
| ter.p-Tery_3453          | (8.0d-31)  | 199 | -----      | -----      | -----      | -NSE       | VENRRQQMNY | VLESNFVS--  |
| A29413.p-Ava0943         | (1.0d-30)  | 220 | -----      | -----      | -----      | -EEI       | AQARTELVGK | AIQMPVLE--  |
| A7120.p-A112963          | (5.0d-29)  | 220 | -----      | -----      | -----      | -EEM       | AQARTELVGK | AIQMPVLE--  |
| Npun.p-NpR4797           | (3.0d-30)  | 200 | -----      | -----      | -----      | -EQD       | THTRRGQLEN | VLKNPVVE--  |
| Cyl-7417.p-Cyl-7417-4424 | (3.0d-30)  | 200 | -----      | -----      | -----      | -EEE       | LQTRREQLNN | VLKNPVVE--  |
| MAST-10914-SCAD-E        |            | 200 | -----      | -----      | -----      | -EHD       | AQIRRDQLNT | VLKVPVME--  |
| M7126-SCAD-C             |            | 200 | -----      | -----      | -----      | -EAD       | LQTRREQLNT | ILKNPVVE--  |
| R7116-SCAD-D             |            | 198 | -----      | -----      | -----      | -EQE       | AEKRRNSMSS | FLESPAAS--  |
| Npun.p-NpF0199           | (2.0d-29)  | 312 | TERALGKDSH | SFLSPSWLTY | LSNRAARRNN | TITRNEENGD | RADRQIVQPT |             |
| A7120.p-Alr5358          | (3.0d-156) | 201 | -----      | -----      | -----      | -----      | -----      | APKLAGIS--  |
| A29413.p-Ava2596         | (8.0d-151) | 201 | -----      | -----      | -----      | -----      | -----      | APKLAGIS--  |
| N-7524.p-N-7524-5224     | (2.0d-121) | 201 | -----      | -----      | -----      | -----      | -----      | APKLAGVT--  |
| Cyl-7417.p-Cyl-7417-1544 | (2.0d-100) | 201 | -----      | -----      | -----      | -----      | -----      | APRLAGVS--  |
| MAST-10914-SCAD-A        |            | 200 | -----      | -----      | -----      | -----      | -----      | APSLARVH--  |
| N-7524.p-N-7524-5355     | (2.0d-74)  | 200 | -----      | -----      | -----      | -----      | -----      | APKLAKVS--  |
| Npun.p-NpF3363           | (2.0d-81)  | 201 | -----      | -----      | -----      | -----      | -----      | APSLSGTS--  |
| R7116-SCAD-A             |            | 214 | -----      | -----      | -----      | -----      | -----      | TTLKA AIS-- |
| cyr.p-c8801?3820         | (4.0d-26)  | 198 | -----      | -----      | -----      | --ESFAG--- | -KSNGLQTS- |             |
| A7120.p-A111418          | (8.0d-26)  | 208 | -----      | -----      | -----      | -GKPLGKSPR | DETQGNMS-- |             |
| consensus                |            | 351 |            |            |            |            |            |             |



|                              |           |     |       |             |            |       |   |            |
|------------------------------|-----------|-----|-------|-------------|------------|-------|---|------------|
| A7120.p-Alr1894              | (1.0d-26) | 217 | ----- | ---QPEEIAG  | MVRFLAADP- | ----- | A | AAYITGQVFN |
| A29413.p-Ava3764             | (1.0d-26) | 217 | ----- | ---QPEEIAG  | MVRFLAADP- | ----- | A | AAYITGQVFN |
| N-7524.p-N-7524-0010         | (9.0d-30) | 217 | ----- | ---QPEEIAG  | MVRFLAADP- | ----- | A | AAYITGQVFN |
| M7126-SCAD-B                 |           | 221 | ----- | ---QPEEIAG  | MVRFLAADP- | ----- | A | AAYITGQVFN |
| nod.p-n9414?22428            | (4.0d-28) | 214 | ----- | ---QPEEIAG  | MVRFLAADP- | ----- | A | AAYITGQVFN |
| MAST-10914-SCAD-B            |           | 221 | ----- | ---QPEEVAG  | MVRFLAADP- | ----- | A | SAYITGQVFN |
| Cal-6303.p-Cal-6303-1520     | (5.0d-28) | 221 | ----- | ---QPEEIAG  | MVRFLASDS- | ----- | A | AAYITGQVFN |
| Npun.p-NpF2349               | (4.0d-29) | 214 | ----- | ---QPEEVAG  | MVRFLAADP- | ----- | A | ANYITGQVFN |
| N-7107.p-N-7107-0937         | (1.0d-27) | 221 | ----- | ---QPEEVAG  | MVRFLAADA- | ----- | A | ANYITGQVFN |
| Ana-90.p-ana90-1712          | (1.0d-28) | 213 | ----- | ---KPEEIAG  | MVRFLASDP- | ----- | A | AAYITGQVFN |
| Acyl-7122.p-acyl-4545        | (9.0d-28) | 213 | ----- | ---QPEEIAG  | MVRFLAADP- | ----- | A | AAYITGQVFN |
| Nsp-0708.p-Nsp-0708-2353     | (9.0d-27) | 213 | ----- | ---EPEDIAG  | MVSFLAADP- | ----- | A | AAYITGQVFN |
| Cyl-505.p-Cyl-505-0204       | (2.0d-28) | 213 | ----- | ---KPEEIAG  | MVSFLATDP- | ----- | A | AAYITGQVFN |
| Cyl-7417.p-Cyl-7417-2349     | (6.0d-29) | 220 | ----- | ---TPEEIAG  | MVRFLAADP- | ----- | A | AAYITGQVFN |
| R7116-SCAD-C                 |           | 220 | ----- | ---KPEEIAG  | MVRFLAADT- | ----- | A | AAYITGQVFN |
| ter.p-Tery_3438              | (2.0d-28) | 221 | ----- | ---KPEEVAG  | MIRFLAADD- | ----- | A | ASYITAQVFN |
| lyn.p-l8106?21814            | (1.0d-27) | 221 | ----- | ---QPQEVAG  | MVRFLAADS- | ----- | A | AAYITGQVFN |
| Amar.p-AM1_5632              | (1.0d-26) | 213 | ----- | ---QPEEVAG  | MIRFLAADP- | ----- | A | SAYITGQVFN |
| cyr.p-c8801?2930             | (1.0d-28) | 216 | ----- | ---MPEEVAG  | MVRFLATDP- | ----- | A | ASYITGQVFN |
| S6803.p-Slr0886              | (4.0d-27) | 213 | ----- | ---QPEEVAG  | TIRFLATDP- | ----- | A | AAYITGQTFN |
| mae.p-MAE_33900              | (3.0d-29) | 220 | ----- | ---KPEEVAG  | MVRFLAADP- | ----- | A | AIYISGQVFN |
| TeBP1.p-tlr1502              | (5.0d-29) | 211 | ----- | ---EPTEVAG  | MVRFLALDP- | ----- | A | AAYITGQVFN |
| S7942.p-Syncpcc7942_0684     | (4.0d-26) | 215 | ----- | ---EAAEVAG  | VVRFLAADP- | ----- | A | AAYITGQVIN |
| syx.p-SynWH7803_1861         | (7.0d-30) | 216 | ----- | ---TPEQVAG  | TVRFLAADP- | ----- | A | AAYITGQVLQ |
| S7805.p-WH7805_13603         | (5.0d-28) | 216 | ----- | ---TPEQVAG  | AVRFLAADS- | ----- | A | AAYITGQVLQ |
| S9916.p-RS9916_33507         | (8.0d-31) | 216 | ----- | ---TPEHIAG  | TVRFLAADP- | ----- | A | AAYITGQVLQ |
| Ssp-RS9917.p-Ssp-RS9917-1614 | (2.0d-29) | 274 | ----- | ---NPDQVAG  | AVRFLAADP- | ----- | A | AAYITGQVLQ |
| S9917.p-RS9917_09056         | (3.0d-29) | 216 | ----- | ---NPDQVAG  | AVRFLAADP- | ----- | A | AAYITGQVLQ |
| syg.p-sync_2137              | (4.0d-29) | 216 | ----- | ---SPDQVAG  | AVRFLAADP- | ----- | A | AAYITGQVLQ |
| P9313.p-PMT1333              | (6.0d-29) | 216 | ----- | ---TPEQVAG  | AVRFLVADP- | ----- | A | AAYITGQVLQ |
| pmf.p-P9303_06521            | (1.0d-28) | 228 | ----- | ---TPEQVAG  | AVRFLAADP- | ----- | A | AAYITGQVLQ |
| S107.p-BL107_09856           | (2.0d-28) | 233 | ----- | ---TQEQQVAG | VVRFLAGDP- | ----- | A | AAYITGQVLQ |
| S9902.p-Sync9902_1745        | (4.0d-28) | 216 | ----- | ---TQEQQVAG | AVRFLAADP- | ----- | A | AAYITGQVLQ |
| S9605.p-Sync9605_0617        | (4.0d-27) | 230 | ----- | ---TQEQQVAG | AVRFLAADP- | ----- | A | AAYITGQVLQ |
| S8102.p-SynW1852             | (9.0d-28) | 216 | ----- | ---TQEQQVAG | AVRFLAADP- | ----- | A | AAYITGQVLQ |
| syr.p-SynRCC307_0681         | (2.0d-28) | 216 | ----- | ---EVDEVAG  | AVRFLAADP- | ----- | A | AAYITGQVLQ |
| S5701.p-WH5701_07809         | (1.0d-28) | 218 | ----- | ---QPEDVAG  | VVRFLAADP- | ----- | A | AAYMTGQVLQ |
| pmn.p-PMN2A_1785             | (5.0d-28) | 216 | ----- | ---NPEDVAG  | AVKFLAADP- | ----- | S | ASYITGQVIQ |
| pme.p-NATL1_05081            | (1.0d-27) | 216 | ----- | ---NPEDVAG  | AVRFLAADP- | ----- | S | ASYITGQVIQ |

|                          |           |     |       |            |            |            |   |             |
|--------------------------|-----------|-----|-------|------------|------------|------------|---|-------------|
| pmz.p-p9211?06582        | (1.0d-27) | 216 | ----- | ---SPEHIAG | TVRFLATDP- | -----      | A | AAYITGQVLQ  |
| PRO1375.p-Pro0452        | (7.0d-27) | 216 | ----- | ---STEHVAG | TVRFLAADP- | -----      | A | SSYITGQVLQ  |
| Gvi.p-glr3506            | (5.0d-28) | 214 | ----- | ---QPEEVAG | LVRFLCADP- | -----      | A | AAYITGQVIT  |
| pmb.p-P9601_05091        | (9.0d-28) | 216 | ----- | ---SCTQIAN | LVSFLVSSN- | -----      | A | GSYITGQTIS  |
| pmi.p-PMT9312_0453       | (1.0d-27) | 216 | ----- | ---SCTQIAN | LVSFLVSSN- | -----      | A | GSYITGQTIS  |
| pmg.p-P9301_04781        | (1.0d-27) | 216 | ----- | ---SCTQIAN | LVSFLVSSD- | -----      | A | GRYITGQTIS  |
| PMED4.p-PMM0453          | (9.0d-28) | 216 | ----- | ---SCSQIAN | LVSFLVSSN- | -----      | A | GSYITGQTIS  |
| pmc.p-P9515_05161        | (2.0d-27) | 216 | ----- | ---SCSQIAD | LVSFLVSSN- | -----      | A | GSYITGQTIS  |
| Npun.p-NpR0578           | (6.0d-27) | 224 | ----- | ---QPEEIAN | AVVWLCSD-  | -----      | A | SSFVVGHALI  |
| Cyl-7417.p-Cyl-7417-0303 | (5.0d-26) | 231 | ----- | ---TVEDVAH | LVTFLSSP-  | -----      | L | TSYINGANLR  |
| Npun.p-NpF2231           | (1.0d-26) | 212 | ----- | ---EPEEVAD | VALFLASH-  | -----      | Q | SRAIHGQAIN  |
| Cyl-7417.p-Cyl-7417-3400 | (1.0d-26) | 212 | ----- | ---EPEEVAD | VALFLASH-  | -----      | Q | SRAIHGQAIN  |
| Acyl-7122.p-acyl-3225    | (4.0d-28) | 209 | ----- | ---TPEIVAQ | TILHTVLLP- | -----      | Q | QAVIEELTLM  |
| Nsp-0708.p-Nsp-0708-2459 | (6.0d-26) | 209 | ----- | ---IPEIVAQ | TILHTALLP- | -----      | Q | QAVIEELTLI  |
| Ana-90.p-ana90-1189      | (1.0d-28) | 209 | ----- | ---TPEIVAT | TILHTVLLP- | -----      | Q | EAVIQEELTIM |
| Cyl-505.p-Cyl-505-2036   | (2.0d-32) | 209 | ----- | ---TAQTVAQ | TILHSALLH- | -----      | Q | EAVIEELTLM  |
| A29413.p-Ava2536         | (2.0d-28) | 209 | ----- | ---TPEIVAQ | SILYTALLP- | -----      | P | QAVIDELTLM  |
| A7120.p-Alr5286          | (2.0d-28) | 223 | ----- | ---TPEIVAQ | SILYTALLP- | -----      | P | QAVIDELTLM  |
| N-7524.p-N-7524-4179     | (1.0d-27) | 209 | ----- | ---TPEIVAQ | SILHTALLP- | -----      | P | QAVIDELILM  |
| MAST-10914-SCAD-C        |           | 213 | ----- | ---TPEIVAQ | SILHAALLP- | -----      | Q | QAVIDELTIM  |
| Cyl-7417.p-Cyl-7417-1063 | (4.0d-30) | 209 | ----- | ---TPEVVAQ | SILHTVLLP- | -----      | Q | QAVIEELILM  |
| nod.p-n9414?21215        | (5.0d-26) | 208 | ----- | ---TPEVVAQ | SILYTALLP- | -----      | Q | QAVIDELTLM  |
| N-7107.p-N-7107-1008     | (2.0d-29) | 209 | ----- | ---TPEIVAQ | SILHTVLLP- | -----      | P | QAVIDELILM  |
| M7126-SCAD-A             |           | 209 | ----- | ---TPEIVAE | SIVHTILLP- | -----      | P | QAVIDELTIM  |
| R7116-SCAD-B             |           | 208 | ----- | ---TPEIVAQ | SILHTVLLP- | -----      | K | QAVVDELTLM  |
| lyn.p-18106?23630        | (2.0d-26) | 209 | ----- | ---TPEIVAE | SILHVVMLP- | -----      | Q | QAVIEELTLM  |
| Amar.p-AM1_5634          | (3.0d-27) | 209 | ----- | ---RPENVAQ | SILHIVQMP- | -----      | Q | NAVIEELVLM  |
| cyb.p-CYB_0189           | (1.0d-27) | 211 | ----- | ---SPEWVAD | LITYIVRLP- | -----      | T | GAVVEDLTFM  |
| cya.p-CYA_2793           | (8.0d-26) | 209 | ----- | ---SPEWVAD | LIAHIVRLP- | -----      | K | GAVVEDLTLM  |
| M7126-SCAD-D             |           | 209 | ----- | ---NPYSIAE | LLLQIATVP- | -----      | A | AINIDDIVIK  |
| cyb.p-CYB_0005           | (4.0d-34) | 231 | ----- | ---VEKVVEP | ILRAMTDPHP | SDRYTAFTGG |   | KVALGLMRLM  |
| cya.p-CYA_0005           | (2.0d-33) | 231 | ----- | ---VEKVVEP | ILRAMTDPHP | SDRYTAFTGG |   | KLALGLMRLM  |
| N-7107.p-N-7107-5182     | (3.0d-28) | 219 | ----- | ---EDIAAA  | INYAVTQPH- | -----      |   | YVNVNEILIR  |
| Npun.p-NpR3707           | (3.0d-27) | 219 | ----- | ---EDVAAA  | IVYAVTQPS- | -----      |   | HVNVNEILIR  |
| Acyl-7122.p-acyl-1205    | (2.0d-26) | 244 | ----- | ---EDIAAAA | IVYAVSQPQ- | -----      |   | HVNVNEILIR  |
| R7116-SCAD-F             |           | 230 | ----- | ---DDIADV  | VLFCVTRPS- | -----      |   | HVNLSSEILLV |
| Npun.p-NpF0204           | (3.0d-28) | 242 | ----- | ---GFQAKAL | AVLAGISPR- | -----      | L | TDKLIELWAF  |
| MAST-10914-SCAD-D        |           | 222 | ----- | ---SPEILIG | WQSHLAVWCN | R-----     | I | APWLLEKVLL  |
| Cal-6303.p-Cal-6303-3407 | (1.0d-27) | 222 | ----- | ---SPEILVG | WQSHLAVWCN | R-----     | I | APWLLEKILL  |
| Ana-90.p-ana90-4359      | (1.0d-27) | 222 | ----- | ---TAEILVG | WQSHLAVLCQ | R-----     | L | APWLLEIIMQ  |

|                          |            |     |            |            |            |            |       |             |
|--------------------------|------------|-----|------------|------------|------------|------------|-------|-------------|
| Cyl-7417.p-Cyl-7417-4762 | (6.0d-27)  | 222 | -----      | ---TPEILVG | WQSHLAVWCQ | R-----     | L     | SPWLLEQILQ  |
| Nsp-0708.p-Nsp-0708-3536 | (2.0d-26)  | 222 | -----      | ---TSEILVG | WQSHLAVWSQ | N-----     | F     | APWLLEVVLLK |
| N-7107.p-N-7107-1296     | (2.0d-26)  | 222 | -----      | ---APEILVG | WQSHLAVWCQ | R-----     | L     | APWLLELILK  |
| Npun.p-NpR1019           | (4.0d-26)  | 222 | -----      | ---SPEILVG | WQSHLAVLCQ | R-----     | L     | APWLLELILR  |
| N-7524.p-N-7524-4265     | (1.0d-25)  | 222 | -----      | ---APEILVG | WQSHLAVWCQ | R-----     | L     | APGLLELLLK  |
| M7126-SCAD-E             |            | 222 | -----      | ---SPEILVG | WQTYLAVWCQ | R-----     | F     | TPWLLEWILN  |
| R7116-SCAD-E             |            | 226 | -----      | ---SSEILVG | WQSHLAILCQ | R-----     | L     | APWLLETVLK  |
| cyt.p-cce_3588           | (3.0d-27)  | 228 | -----      | ---TPEILVG | WQSYLAVWGQ | R-----     | L     | APRLIEQFTI  |
| ctc.p-c0110?06289        | (2.0d-26)  | 227 | -----      | ---KPEILVG | WQSYLAIWGQ | R-----     | L     | APRLTEQFTT  |
| cyr.p-c8801?0598         | (2.0d-26)  | 222 | -----      | ---RREILVG | WQSHLAVWCQ | R-----     | L     | VPRLIEQISV  |
| Amar.p-AM1_6363          | (1.0d-30)  | 222 | -----      | ---SPEILVG | WQSHLAVLGN | R-----     | F     | APRFLEWWLQ  |
| Amar.p-AM1_0210          | (1.0d-27)  | 224 | -----      | ---KKEIIVG | WQSKIAIFAS | Y-----     | I     | APGFVERAMQ  |
| lyn.p-l8106?00785        | (4.0d-31)  | 220 | -----      | ---QPEDIAK | AIWEAVNQKK | S----      | ETVVG | LTSIATEAYR  |
| ter.p-Tery_3453          | (8.0d-31)  | 220 | -----      | ---QPKDIAE | AIWNVYKNNQ | S----      | EIVVG | PAVLATETYR  |
| A29413.p-Ava0943         | (1.0d-30)  | 241 | -----      | ---KPEDVAK | AIWSAVKNKR | S----      | DVVVG | SANFWKAAAYQ |
| A7120.p-A112963          | (5.0d-29)  | 241 | -----      | ---KPEDVAK | AIWSAVKEKR | S----      | DVVVG | SANFWKAAAYQ |
| Npun.p-NpR4797           | (3.0d-30)  | 221 | -----      | ---KPEDVAN | AIWDAVKNKK | S----      | EVMVG | SANLSQSILYR |
| Cyl-7417.p-Cyl-7417-4424 | (3.0d-30)  | 221 | -----      | ---KPEDVAN | AIWDAVNNQK | S----      | EVMVG | SANFSQSILYR |
| MAST-10914-SCAD-E        |            | 221 | -----      | ---KPEDVAN | AIWDAVKNQK | S----      | EVMVG | SANVSQGFYR  |
| M7126-SCAD-C             |            | 221 | -----      | ---KPEDVAN | AIWDAVKNQK | S----      | EVTVC | SANFSQALYR  |
| R7116-SCAD-D             |            | 219 | -----      | ---KPEDVAN | AVWDAVKHQK | D----      | EVVVG | SGSFMSAAYK  |
| Npun.p-NpF0199           | (2.0d-29)  | 362 | PQTTTEQPKI | QLIQPSQASP | EIQACFNDIQ | D----      | TLGIP | WTPANWRAYA  |
| A7120.p-Alr5358          | (3.0d-156) | 209 | -----      | ---TPKSVAN | AVVKAIKNKT | TEVIVNQNP  | I     | TESLTKLMLA  |
| A29413.p-Ava2596         | (8.0d-151) | 209 | -----      | ---TPKSVAN | AVVKAIKKKT | SEVVVNQNP  | I     | TESLTKFMLA  |
| N-7524.p-N-7524-5224     | (2.0d-121) | 209 | -----      | ---TPKGIAN | AVMRAVGNP  | AEIIVNQNP  | I     | TEGLTKLMLA  |
| Cyl-7417.p-Cyl-7417-1544 | (2.0d-100) | 209 | -----      | ---TPTEVAN | AVIKAIKQNE | AEVIVNESRI |       | TENLTKVMFA  |
| MAST-10914-SCAD-A        |            | 208 | -----      | ---RPLDVAI | AVIQAIKQNQ | GEVLLDG--- | --    | VLTRLLFS    |
| N-7524.p-N-7524-5355     | (2.0d-74)  | 208 | -----      | ---QPTEVAI | AIIKAIKQNQ | PEVMLDG--- | --    | VLTRLLFS    |
| Npun.p-NpF3363           | (2.0d-81)  | 209 | -----      | ---QPEAVAK | AVIQAIKKNQ | AEVIVNKDLI |       | TVGLTKILFA  |
| R7116-SCAD-A             |            | 222 | -----      | ---IPEKVAI | AVCYTLENNG | VEIVENGFL  |       | TRNITKLKFA  |
| cyr.p-c8801?3820         | (4.0d-26)  | 211 | -----      | ---AEEVVKD | ALKALENNQS | N-----     | CV    | TGGFANQLIV  |
| A7120.p-A111418          | (8.0d-26)  | 225 | -----      | ---VDECVRQ | IIWAMERRKR | E-----     | H     | IMTLKGKVIP  |
| consensus                |            | 401 |            |            |            |            |       |             |

|                              |           |     |            |        |       |       |       |
|------------------------------|-----------|-----|------------|--------|-------|-------|-------|
| A7120.p-Alr1894              | (1.0d-26) | 244 | VDGGM---VM | A----- | ----- | ----- | ----- |
| A29413.p-Ava3764             | (1.0d-26) | 244 | VDGGM---VM | A----- | ----- | ----- | ----- |
| N-7524.p-N-7524-0010         | (9.0d-30) | 244 | VDGGM---VM | -----  | ----- | ----- | ----- |
| M7126-SCAD-B                 |           | 248 | VDGGM---VM | A----- | ----- | ----- | ----- |
| nod.p-n9414?22428            | (4.0d-28) | 241 | VDGGM---VM | A----- | ----- | ----- | ----- |
| MAST-10914-SCAD-B            |           | 248 | VDGGM---VM | A----- | ----- | ----- | ----- |
| Cal-6303.p-Cal-6303-1520     | (5.0d-28) | 248 | VDGGM---VM | A----- | ----- | ----- | ----- |
| Npun.p-NpF2349               | (4.0d-29) | 241 | VDGGM---VM | A----- | ----- | ----- | ----- |
| N-7107.p-N-7107-0937         | (1.0d-27) | 248 | VDGGM---VM | -----  | ----- | ----- | ----- |
| Ana-90.p-ana90-1712          | (1.0d-28) | 240 | VDGGM---VM | -----  | ----- | ----- | ----- |
| Acyl-7122.p-acyl-4545        | (9.0d-28) | 240 | VDGGM---VM | -----  | ----- | ----- | ----- |
| Nsp-0708.p-Nsp-0708-2353     | (9.0d-27) | 240 | VDGGM---VM | -----  | ----- | ----- | ----- |
| Cyl-505.p-Cyl-505-0204       | (2.0d-28) | 240 | VDGGM---VI | -----  | ----- | ----- | ----- |
| Cyl-7417.p-Cyl-7417-2349     | (6.0d-29) | 247 | VDGGM---VM | A----- | ----- | ----- | ----- |
| R7116-SCAD-C                 |           | 247 | VDGGM---VM | A----- | ----- | ----- | ----- |
| ter.p-Tery_3438              | (2.0d-28) | 248 | VDGGF----- | -----  | ----- | ----- | ----- |
| lyn.p-l8106?21814            | (1.0d-27) | 248 | VDGGM---VM | A----- | ----- | ----- | ----- |
| Amar.p-AM1_5632              | (1.0d-26) | 240 | VDGGM---VM | A----- | ----- | ----- | ----- |
| cyr.p-c8801?2930             | (1.0d-28) | 243 | VDGGM---VM | A----- | ----- | ----- | ----- |
| S6803.p-Slr0886              | (4.0d-27) | 240 | VDGGM---VM | F----- | ----- | ----- | ----- |
| mae.p-MAE_33900              | (3.0d-29) | 247 | VDGGM---VM | A----- | ----- | ----- | ----- |
| TeBP1.p-tlr1502              | (5.0d-29) | 238 | VDGGM---VM | A----- | ----- | ----- | ----- |
| S7942.p-Synpcc7942_0684      | (4.0d-26) | 242 | IDGGL---VM | A----- | ----- | ----- | ----- |
| syx.p-SynWH7803_1861         | (7.0d-30) | 243 | VDGGM---VM | G----- | ----- | ----- | ----- |
| S7805.p-WH7805_13603         | (5.0d-28) | 243 | VDGGM---VM | G----- | ----- | ----- | ----- |
| S9916.p-RS9916_33507         | (8.0d-31) | 243 | VDGGM---VM | G----- | ----- | ----- | ----- |
| Ssp-RS9917.p-Ssp-RS9917-1614 | (2.0d-29) | 301 | VDGGM---VM | G----- | ----- | ----- | ----- |
| S9917.p-RS9917_09056         | (3.0d-29) | 243 | VDGGM---VM | G----- | ----- | ----- | ----- |
| syg.p-sync_2137              | (4.0d-29) | 243 | VDGGM---VM | S----- | ----- | ----- | ----- |
| P9313.p-PMT1333              | (6.0d-29) | 243 | VDGGM---LM | G----- | ----- | ----- | ----- |
| pmf.p-P9303_06521            | (1.0d-28) | 255 | VDGGM---LM | G----- | ----- | ----- | ----- |
| S107.p-BL107_09856           | (2.0d-28) | 260 | VDGGM---VM | A----- | ----- | ----- | ----- |
| S9902.p-Syncc9902_1745       | (4.0d-28) | 243 | VDGGM---VM | A----- | ----- | ----- | ----- |
| S9605.p-Syncc9605_0617       | (4.0d-27) | 257 | VDGGM---VM | A----- | ----- | ----- | ----- |
| S8102.p-SynW1852             | (9.0d-28) | 243 | VDGGM---VM | A----- | ----- | ----- | ----- |
| syr.p-SynRCC307_0681         | (2.0d-28) | 243 | VDGGM---VM | A----- | ----- | ----- | ----- |
| S5701.p-WH5701_07809         | (1.0d-28) | 245 | VDGGL---VM | R----- | ----- | ----- | ----- |
| pmn.p-PMN2A_1785             | (5.0d-28) | 243 | VDGGM---VM | S----- | ----- | ----- | ----- |
| pme.p-NATL1_05081            | (1.0d-27) | 243 | VDGGM---VM | S----- | ----- | ----- | ----- |

|                          |           |     |            |            |            |            |            |
|--------------------------|-----------|-----|------------|------------|------------|------------|------------|
| pmz.p-p9211?06582        | (1.0d-27) | 243 | VDGGM---LM | S-----     | -----      | -----      | -----      |
| PRO1375.p-Pro0452        | (7.0d-27) | 243 | VDGGM---VM | S-----     | -----      | -----      | -----      |
| Gvi.p-glr3506            | (5.0d-28) | 241 | IDGGM---VM | A-----     | -----      | -----      | -----      |
| pmb.p-P9601_05091        | (9.0d-28) | 243 | IDGGM---SI | -----      | -----      | -----      | -----      |
| pmi.p-PMT9312_0453       | (1.0d-27) | 243 | IDGGM---SI | -----      | -----      | -----      | -----      |
| pmg.p-P9301_04781        | (1.0d-27) | 243 | IDGGM---SI | -----      | -----      | -----      | -----      |
| PMED4.p-PMM0453          | (9.0d-28) | 243 | IDGGM---SI | -----      | -----      | -----      | -----      |
| pmc.p-P9515_05161        | (2.0d-27) | 243 | IDGGM---SI | -----      | -----      | -----      | -----      |
| Npun.p-NpR0578           | (6.0d-27) | 250 | IDGGQ---TV | Q-----     | -----      | -----      | -----      |
| Cyl-7417.p-Cyl-7417-0303 | (5.0d-26) | 257 | VDGAW---AS | SIN-----   | -----      | -----      | -----      |
| Npun.p-NpF2231           | (1.0d-26) | 238 | VYGGVNYRLM | REAPLMTKPY | -----      | -----      | -----      |
| Cyl-7417.p-Cyl-7417-3400 | (1.0d-26) | 238 | VYGGVDYRLM | RG-----    | -----      | -----      | -----      |
| Acyl-7122.p-acyl-3225    | (4.0d-28) | 236 | SNAGVL---- | -----      | -----      | -----      | -----      |
| Nsp-0708.p-Nsp-0708-2459 | (6.0d-26) | 236 | SNAGVI---- | -----      | -----      | -----      | -----      |
| Ana-90.p-ana90-1189      | (1.0d-28) | 236 | SNAGVL---- | -----      | -----      | -----      | -----      |
| Cyl-505.p-Cyl-505-2036   | (2.0d-32) | 236 | SNAGVL---- | -----      | -----      | -----      | -----      |
| A29413.p-Ava2536         | (2.0d-28) | 236 | PSAGAL---- | -----      | -----      | -----      | -----      |
| A7120.p-Alr5286          | (2.0d-28) | 250 | PSAGAL---- | -----      | -----      | -----      | -----      |
| N-7524.p-N-7524-4179     | (1.0d-27) | 236 | PSAGAL---- | -----      | -----      | -----      | -----      |
| MAST-10914-SCAD-C        |           | 240 | PMAGAL---- | -----      | -----      | -----      | -----      |
| Cyl-7417.p-Cyl-7417-1063 | (4.0d-30) | 236 | PNAGVL---- | -----      | -----      | -----      | -----      |
| nod.p-n9414?21215        | (5.0d-26) | 235 | PSAGAL---- | -----      | -----      | -----      | -----      |
| N-7107.p-N-7107-1008     | (2.0d-29) | 236 | PNTGTF---- | -----      | -----      | -----      | -----      |
| M7126-SCAD-A             |           | 236 | PSAGVL---- | -----      | -----      | -----      | -----      |
| R7116-SCAD-B             |           | 235 | PSAGVL---- | -----      | -----      | -----      | -----      |
| lyn.p-l8106?23630        | (2.0d-26) | 236 | PHGGAF---- | -----      | -----      | -----      | -----      |
| Amar.p-AM1_5634          | (3.0d-27) | 236 | PNAGTF---- | -----      | -----      | -----      | -----      |
| cyb.p-CYB_0189           | (1.0d-27) | 238 | PAVGAF---- | -----      | -----      | -----      | -----      |
| cya.p-CYA_2793           | (8.0d-26) | 236 | PAAGAF---- | -----      | -----      | -----      | -----      |
| M7126-SCAD-D             |           | 236 | RM-----    | -----      | -----      | -----      | -----      |
| cyb.p-CYB_0005           | (4.0d-34) | 268 | PAALADSMWR | RVYGLDGLGS | PGSA-----  | -----      | -----      |
| cya.p-CYA_0005           | (2.0d-33) | 268 | PAALADQMWR | RVYGLDALGS | PKSA-----  | -----      | -----      |
| N-7107.p-N-7107-5182     | (3.0d-28) | 244 | PTLQER---- | -----      | -----      | -----      | -----      |
| Npun.p-NpR3707           | (3.0d-27) | 244 | PTQQEH---- | -----      | -----      | -----      | -----      |
| Acyl-7122.p-acyl-1205    | (2.0d-26) | 269 | PTQQER---- | -----      | -----      | -----      | -----      |
| R7116-SCAD-F             |           | 255 | PVDQASATMV | NRK-----   | -----      | -----      | -----      |
| Npun.p-NpF0204           | (3.0d-28) | 269 | PSQQSDRPSR | DREDSALYRA | GYGMHERGTH | QGWIRSGSLY | VKAEKHPVTT |
| MAST-10914-SCAD-D        |           | 251 | MAAPQE---- | -----      | -RQLHYPRFR | DARGRT---- | -----      |
| Cal-6303.p-Cal-6303-3407 | (1.0d-27) | 251 | ISAPLPP--- | -----      | VRRKYYQQLR | KA-----    | -----      |
| Ana-90.p-ana90-4359      | (1.0d-27) | 251 | LATPKKPLPD | A-----A    | G-----     | -----      | -----      |

|                                     |                                                            |
|-------------------------------------|------------------------------------------------------------|
| Cyl-7417.p-Cyl-7417-4762 (6.0d-27)  | 251 FATPGRKQPQ E-----S LIQNFRAKIH RFGDWLLSGN MASFVFARKS    |
| Nsp-0708.p-Nsp-0708-3536 (2.0d-26)  | 251 LAAP-RKQPQ I-----S LIKSLTAKIQ HFSNWLFSKN KVAFVSEK-     |
| N-7107.p-N-7107-1296 (2.0d-26)      | 251 IATPP---KQ Q-----HVV EKPSLLSRIN RFCDSFFSRN MDSLLSPRKS  |
| Npun.p-NpR1019 (4.0d-26)            | 251 IATPPVPRKQ QPAERLNKLI PKNFLNRIH RFGDLFLSRT -----       |
| N-7524.p-N-7524-4265 (1.0d-25)      | 251 IAAPTAP--- -----KTL EQPSLFTKIQ RFGDFLFSAQ RLPFVFARKS   |
| M7126-SCAD-E                        | 251 LATP----- -----S TTNRLLSKFQ RLSDLLWSNN MTAFVSARKS      |
| R7116-SCAD-E                        | 255 LASP----- ----- --DSKAPKIQ EYYQRLVGSW -----            |
| cyt.p-cce_3588 (3.0d-27)            | 257 MTAP----- ----- --LSQKPHSS NLNSFRLN-- -----            |
| ctc.p-c0110?06289 (2.0d-26)         | 256 MAAP----- ----- --LSQKSRLS KLIPFWLS-- -----            |
| cyr.p-c8801?0598 (2.0d-26)          | 251 MAAP----- ----- --LSRVPQVR PLESLLQTRS PF-----          |
| Amar.p-AM1_6363 (1.0d-30)           | 251 LTAP----- ----- --RSEQPKKS IWSRGY---- -----            |
| Amar.p-AM1_0210 (1.0d-27)           | 253 LSARLG---- ----- HRQSTRQTEF EFKDCCNAGP S-----          |
| lyn.p-l8106?00785 (4.0d-31)         | 253 LFPGLMQFIM SQAQNQOK-- -----                            |
| ter.p-Tery_3453 (8.0d-31)           | 253 LFPGLTQFLM GKSVE----- -----                            |
| A29413.p-Ava0943 (1.0d-30)          | 274 LTPSLIQSLV RRVFGMEERK -----                            |
| A7120.p-A112963 (5.0d-29)           | 274 LTPSLIQSLV RRVFGMEERK -----                            |
| Npun.p-NpR4797 (3.0d-30)            | 254 LFPGLIKWVS RQGLKNQDN-----                              |
| Cyl-7417.p-Cyl-7417-4424 (3.0d-30)  | 254 LFPGLMKWVS RQTLKNQE-- -----                            |
| MAST-10914-SCAD-E                   | 254 LFPGLLQWVS RQGLKNKDK-----                              |
| M7126-SCAD-C                        | 254 LFPGLTKWLS RQALQNQDK-----                              |
| R7116-SCAD-D                        | 252 FFPGLMQLAM QTSKQ-----                                  |
| Npun.p-NpF0199 (2.0d-29)            | 408 MYPSVMQLFW QRLKPAMQTE AFLEDAIAIS EHVYRDINDW YQPGYQIEVE |
| A7120.p-Alr5358 (3.0d-156)          | 246 VGQISPTSVD RIYRWFVVD FNQKRAENRV KDGYPVAVESH RS-----    |
| A29413.p-Ava2596 (8.0d-151)         | 246 IGQISPTSVD RIYRWLGVD FNQKRAENRV KDGYPVAVESH RS-----    |
| N-7524.p-N-7524-5224 (2.0d-121)     | 246 MGQISPTAVD QLYQWLGIVN FNQIRAGNRA NLKCAAVG-- RA-----    |
| Cyl-7417.p-Cyl-7417-1544 (2.0d-100) | 246 IGQLYPQFLD AVYQWLDVVN LNQKRAKSFL KNRYQRVSK-----        |
| MAST-10914-SCAD-A                   | 240 NIQLFPNFGD AIYRWIGLTK LNRTCAENQM RDESSAQN-- -----      |
| N-7524.p-N-7524-5355 (2.0d-74)      | 240 NIQLFPEFGD KIFNWIGVRQ LNKTRAEN-- -----                 |
| Npun.p-NpF3363 (2.0d-81)            | 246 LWQFFPKFGD AIYRRIGVIA LNKRRQTKN YSNSINLLHK -----       |
| R7116-SCAD-A                        | 259 FEEHLPRFGD DIKR-----S LHQPNSQ--- -----                 |
| cyr.p-c8801?3820 (4.0d-26)          | 241 NASRFVPREF LVNAVEKQFR A-----                           |
| A7120.p-A111418 (8.0d-26)           | 254 WAKLILPGFV DRIVAATIRK TTST-----                        |
| consensus                           | 451                                                        |

|                              |           |     |       |       |       |       |       |
|------------------------------|-----------|-----|-------|-------|-------|-------|-------|
| A7120.p-Alr1894              | (1.0d-26) | 251 | ----- | ----- | ----- | ----- | ----- |
| A29413.p-Ava3764             | (1.0d-26) | 251 | ----- | ----- | ----- | ----- | ----- |
| N-7524.p-N-7524-0010         | (9.0d-30) | 250 | ----- | ----- | ----- | ----- | ----- |
| M7126-SCAD-B                 |           | 255 | ----- | ----- | ----- | ----- | ----- |
| nod.p-n9414?22428            | (4.0d-28) | 248 | ----- | ----- | ----- | ----- | ----- |
| MAST-10914-SCAD-B            |           | 255 | ----- | ----- | ----- | ----- | ----- |
| Cal-6303.p-Cal-6303-1520     | (5.0d-28) | 255 | ----- | ----- | ----- | ----- | ----- |
| Npun.p-NpF2349               | (4.0d-29) | 248 | ----- | ----- | ----- | ----- | ----- |
| N-7107.p-N-7107-0937         | (1.0d-27) | 254 | ----- | ----- | ----- | ----- | ----- |
| Ana-90.p-ana90-1712          | (1.0d-28) | 246 | ----- | ----- | ----- | ----- | ----- |
| Acyl-7122.p-acyl-4545        | (9.0d-28) | 246 | ----- | ----- | ----- | ----- | ----- |
| Nsp-0708.p-Nsp-0708-2353     | (9.0d-27) | 246 | ----- | ----- | ----- | ----- | ----- |
| Cyl-505.p-Cyl-505-0204       | (2.0d-28) | 246 | ----- | ----- | ----- | ----- | ----- |
| Cyl-7417.p-Cyl-7417-2349     | (6.0d-29) | 254 | ----- | ----- | ----- | ----- | ----- |
| R7116-SCAD-C                 |           | 254 | ----- | ----- | ----- | ----- | ----- |
| ter.p-Tery_3438              | (2.0d-28) | 252 | ----- | ----- | ----- | ----- | ----- |
| lyn.p-l8106?21814            | (1.0d-27) | 255 | ----- | ----- | ----- | ----- | ----- |
| Amar.p-AM1_5632              | (1.0d-26) | 247 | ----- | ----- | ----- | ----- | ----- |
| cyr.p-c8801?2930             | (1.0d-28) | 250 | ----- | ----- | ----- | ----- | ----- |
| S6803.p-Slr0886              | (4.0d-27) | 247 | ----- | ----- | ----- | ----- | ----- |
| mae.p-MAE_33900              | (3.0d-29) | 254 | ----- | ----- | ----- | ----- | ----- |
| TeBP1.p-tlr1502              | (5.0d-29) | 245 | ----- | ----- | ----- | ----- | ----- |
| S7942.p-Synpcc7942_0684      | (4.0d-26) | 249 | ----- | ----- | ----- | ----- | ----- |
| syx.p-SynWH7803_1861         | (7.0d-30) | 250 | ----- | ----- | ----- | ----- | ----- |
| S7805.p-WH7805_13603         | (5.0d-28) | 250 | ----- | ----- | ----- | ----- | ----- |
| S9916.p-RS9916_33507         | (8.0d-31) | 250 | ----- | ----- | ----- | ----- | ----- |
| Ssp-RS9917.p-Ssp-RS9917-1614 | (2.0d-29) | 308 | ----- | ----- | ----- | ----- | ----- |
| S9917.p-RS9917_09056         | (3.0d-29) | 250 | ----- | ----- | ----- | ----- | ----- |
| syg.p-sync_2137              | (4.0d-29) | 250 | ----- | ----- | ----- | ----- | ----- |
| P9313.p-PMT1333              | (6.0d-29) | 250 | ----- | ----- | ----- | ----- | ----- |
| pmf.p-P9303_06521            | (1.0d-28) | 262 | ----- | ----- | ----- | ----- | ----- |
| S107.p-BL107_09856           | (2.0d-28) | 267 | ----- | ----- | ----- | ----- | ----- |
| S9902.p-Sync9902_1745        | (4.0d-28) | 250 | ----- | ----- | ----- | ----- | ----- |
| S9605.p-Sync9605_0617        | (4.0d-27) | 264 | ----- | ----- | ----- | ----- | ----- |
| S8102.p-SynW1852             | (9.0d-28) | 250 | ----- | ----- | ----- | ----- | ----- |
| syr.p-SynRCC307_0681         | (2.0d-28) | 250 | ----- | ----- | ----- | ----- | ----- |
| S5701.p-WH5701_07809         | (1.0d-28) | 252 | ----- | ----- | ----- | ----- | ----- |
| pmn.p-PMN2A_1785             | (5.0d-28) | 250 | ----- | ----- | ----- | ----- | ----- |
| pme.p-NATL1_05081            | (1.0d-27) | 250 | ----- | ----- | ----- | ----- | ----- |

|                          |           |     |            |            |       |       |       |
|--------------------------|-----------|-----|------------|------------|-------|-------|-------|
| pmz.p-p9211?06582        | (1.0d-27) | 250 | -----      | -----      | ----- | ----- | ----- |
| PRO1375.p-Pro0452        | (7.0d-27) | 250 | -----      | -----      | ----- | ----- | ----- |
| Gvi.p-glr3506            | (5.0d-28) | 248 | -----      | -----      | ----- | ----- | ----- |
| pmb.p-P9601_05091        | (9.0d-28) | 249 | -----      | -----      | ----- | ----- | ----- |
| pmi.p-PMT9312_0453       | (1.0d-27) | 249 | -----      | -----      | ----- | ----- | ----- |
| pmg.p-P9301_04781        | (1.0d-27) | 249 | -----      | -----      | ----- | ----- | ----- |
| PMED4.p-PMM0453          | (9.0d-28) | 249 | -----      | -----      | ----- | ----- | ----- |
| pmc.p-P9515_05161        | (2.0d-27) | 249 | -----      | -----      | ----- | ----- | ----- |
| Npun.p-NpR0578           | (6.0d-27) | 257 | -----      | -----      | ----- | ----- | ----- |
| Cyl-7417.p-Cyl-7417-0303 | (5.0d-26) | 266 | -----      | -----      | ----- | ----- | ----- |
| Npun.p-NpF2231           | (1.0d-26) | 257 | -----      | -----      | ----- | ----- | ----- |
| Cyl-7417.p-Cyl-7417-3400 | (1.0d-26) | 249 | -----      | -----      | ----- | ----- | ----- |
| Acyl-7122.p-acyl-3225    | (4.0d-28) | 241 | -----      | -----      | ----- | ----- | ----- |
| Nsp-0708.p-Nsp-0708-2459 | (6.0d-26) | 241 | -----      | -----      | ----- | ----- | ----- |
| Ana-90.p-ana90-1189      | (1.0d-28) | 241 | -----      | -----      | ----- | ----- | ----- |
| Cyl-505.p-Cyl-505-2036   | (2.0d-32) | 241 | -----      | -----      | ----- | ----- | ----- |
| A29413.p-Ava2536         | (2.0d-28) | 241 | -----      | -----      | ----- | ----- | ----- |
| A7120.p-Alr5286          | (2.0d-28) | 255 | -----      | -----      | ----- | ----- | ----- |
| N-7524.p-N-7524-4179     | (1.0d-27) | 241 | -----      | -----      | ----- | ----- | ----- |
| MAST-10914-SCAD-C        |           | 245 | -----      | -----      | ----- | ----- | ----- |
| Cyl-7417.p-Cyl-7417-1063 | (4.0d-30) | 241 | -----      | -----      | ----- | ----- | ----- |
| nod.p-n9414?21215        | (5.0d-26) | 240 | -----      | -----      | ----- | ----- | ----- |
| N-7107.p-N-7107-1008     | (2.0d-29) | 241 | -----      | -----      | ----- | ----- | ----- |
| M7126-SCAD-A             |           | 241 | -----      | -----      | ----- | ----- | ----- |
| R7116-SCAD-B             |           | 240 | -----      | -----      | ----- | ----- | ----- |
| lyn.p-18106?23630        | (2.0d-26) | 241 | -----      | -----      | ----- | ----- | ----- |
| Amar.p-AM1_5634          | (3.0d-27) | 241 | -----      | -----      | ----- | ----- | ----- |
| cyb.p-CYB_0189           | (1.0d-27) | 243 | -----      | -----      | ----- | ----- | ----- |
| cya.p-CYA_2793           | (8.0d-26) | 241 | -----      | -----      | ----- | ----- | ----- |
| M7126-SCAD-D             |           | 237 | -----      | -----      | ----- | ----- | ----- |
| cyb.p-CYB_0005           | (4.0d-34) | 291 | -----      | -----      | ----- | ----- | ----- |
| cya.p-CYA_0005           | (2.0d-33) | 291 | -----      | -----      | ----- | ----- | ----- |
| N-7107.p-N-7107-5182     | (3.0d-28) | 249 | -----      | -----      | ----- | ----- | ----- |
| Npun.p-NpR3707           | (3.0d-27) | 249 | -----      | -----      | ----- | ----- | ----- |
| Acyl-7122.p-acyl-1205    | (2.0d-26) | 274 | -----      | -----      | ----- | ----- | ----- |
| R7116-SCAD-F             |           | 267 | -----      | -----      | ----- | ----- | ----- |
| Npun.p-NpF0204           | (3.0d-28) | 319 | TIIVVGLGTL | IWWFTSFAV- | ----- | ----- | ----- |
| MAST-10914-SCAD-D        |           | 271 | -----      | -----      | ----- | ----- | ----- |
| Cal-6303.p-Cal-6303-3407 | (1.0d-27) | 269 | -----      | -----      | ----- | ----- | ----- |
| Ana-90.p-ana90-4359      | (1.0d-27) | 263 | -----      | -----      | ----- | ----- | ----- |



|                          |            |     |            |            |            |            |            |
|--------------------------|------------|-----|------------|------------|------------|------------|------------|
| Cyl-7417.p-Cyl-7417-4762 | (6.0d-27)  | 292 | -----      | -----      | -----      | -----      | -----      |
| Nsp-0708.p-Nsp-0708-3536 | (2.0d-26)  | 290 | -----      | -----      | -----      | -----      | -----      |
| N-7107.p-N-7107-1296     | (2.0d-26)  | 291 | -----      | -----      | -----      | -----      | -----      |
| Npun.p-NpR1019           | (4.0d-26)  | 290 | -----      | -----      | -----      | -----      | -----      |
| N-7524.p-N-7524-4265     | (1.0d-25)  | 290 | -----      | -----      | -----      | -----      | -----      |
| M7126-SCAD-E             |            | 285 | -----      | -----      | -----      | -----      | -----      |
| R7116-SCAD-E             |            | 276 | -----      | -----      | -----      | -----      | -----      |
| cyt.p-cce_3588           | (3.0d-27)  | 276 | -----      | -----      | -----      | -----      | -----      |
| ctc.p-c0110?06289        | (2.0d-26)  | 275 | -----      | -----      | -----      | -----      | -----      |
| cyr.p-c8801?0598         | (2.0d-26)  | 274 | -----      | -----      | -----      | -----      | -----      |
| Amar.p-AM1_6363          | (1.0d-30)  | 268 | -----      | -----      | -----      | -----      | -----      |
| Amar.p-AM1_0210          | (1.0d-27)  | 279 | -----      | -----      | -----      | -----      | -----      |
| lyn.p-l8106?00785        | (4.0d-31)  | 270 | -----      | -----      | -----      | -----      | -----      |
| ter.p-Tery_3453          | (8.0d-31)  | 267 | -----      | -----      | -----      | -----      | -----      |
| A29413.p-Ava0943         | (1.0d-30)  | 293 | -----      | -----      | -----      | -----      | -----      |
| A7120.p-Al12963          | (5.0d-29)  | 293 | -----      | -----      | -----      | -----      | -----      |
| Npun.p-NpR4797           | (3.0d-30)  | 272 | -----      | -----      | -----      | -----      | -----      |
| Cyl-7417.p-Cyl-7417-4424 | (3.0d-30)  | 271 | -----      | -----      | -----      | -----      | -----      |
| MAST-10914-SCAD-E        |            | 272 | -----      | -----      | -----      | -----      | -----      |
| M7126-SCAD-C             |            | 272 | -----      | -----      | -----      | -----      | -----      |
| R7116-SCAD-D             |            | 266 | -----      | -----      | -----      | -----      | -----      |
| Npun.p-NpF0199           | (2.0d-29)  | 458 | QAQQHHIRQE | LNAFIFGNPQ | LLIQQIALSK | TLAGEIVGQD | GSIDSRHGPN |
| A7120.p-Alr5358          | (3.0d-156) | 287 | -----      | -----      | -----      | -----      | -----      |
| A29413.p-Ava2596         | (8.0d-151) | 287 | -----      | -----      | -----      | -----      | -----      |
| N-7524.p-N-7524-5224     | (2.0d-121) | 285 | -----      | -----      | -----      | -----      | -----      |
| Cyl-7417.p-Cyl-7417-1544 | (2.0d-100) | 284 | -----      | -----      | -----      | -----      | -----      |
| MAST-10914-SCAD-A        |            | 277 | -----      | -----      | -----      | -----      | -----      |
| N-7524.p-N-7524-5355     | (2.0d-74)  | 267 | -----      | -----      | -----      | -----      | -----      |
| Npun.p-NpF3363           | (2.0d-81)  | 285 | -----      | -----      | -----      | -----      | -----      |
| R7116-SCAD-A             |            | 280 | -----      | -----      | -----      | -----      | -----      |
| cyr.p-c8801?3820         | (4.0d-26)  | 261 | -----      | -----      | -----      | -----      | -----      |
| A7120.p-Al11418          | (8.0d-26)  | 277 | -----      | -----      | -----      | -----      | -----      |
| consensus                |            | 501 | -----      | -----      | -----      | -----      | -----      |

|                              |           |     |      |      |      |      |      |
|------------------------------|-----------|-----|------|------|------|------|------|
| A7120.p-Alr1894              | (1.0d-26) | 251 | ---- | ---- | ---- | ---- | ---- |
| A29413.p-Ava3764             | (1.0d-26) | 251 | ---- | ---- | ---- | ---- | ---- |
| N-7524.p-N-7524-0010         | (9.0d-30) | 250 | ---- | ---- | ---- | ---- | ---- |
| M7126-SCAD-B                 |           | 255 | ---- | ---- | ---- | ---- | ---- |
| nod.p-n9414?22428            | (4.0d-28) | 248 | ---- | ---- | ---- | ---- | ---- |
| MAST-10914-SCAD-B            |           | 255 | ---- | ---- | ---- | ---- | ---- |
| Cal-6303.p-Cal-6303-1520     | (5.0d-28) | 255 | ---- | ---- | ---- | ---- | ---- |
| Npun.p-NpF2349               | (4.0d-29) | 248 | ---- | ---- | ---- | ---- | ---- |
| N-7107.p-N-7107-0937         | (1.0d-27) | 254 | ---- | ---- | ---- | ---- | ---- |
| Ana-90.p-ana90-1712          | (1.0d-28) | 246 | ---- | ---- | ---- | ---- | ---- |
| Acyl-7122.p-acyl-4545        | (9.0d-28) | 246 | ---- | ---- | ---- | ---- | ---- |
| Nsp-0708.p-Nsp-0708-2353     | (9.0d-27) | 246 | ---- | ---- | ---- | ---- | ---- |
| Cyl-505.p-Cyl-505-0204       | (2.0d-28) | 246 | ---- | ---- | ---- | ---- | ---- |
| Cyl-7417.p-Cyl-7417-2349     | (6.0d-29) | 254 | ---- | ---- | ---- | ---- | ---- |
| R7116-SCAD-C                 |           | 254 | ---- | ---- | ---- | ---- | ---- |
| ter.p-Tery_3438              | (2.0d-28) | 252 | ---- | ---- | ---- | ---- | ---- |
| lyn.p-l8106?21814            | (1.0d-27) | 255 | ---- | ---- | ---- | ---- | ---- |
| Amar.p-AM1_5632              | (1.0d-26) | 247 | ---- | ---- | ---- | ---- | ---- |
| cyr.p-c8801?2930             | (1.0d-28) | 250 | ---- | ---- | ---- | ---- | ---- |
| S6803.p-Slr0886              | (4.0d-27) | 247 | ---- | ---- | ---- | ---- | ---- |
| mae.p-MAE_33900              | (3.0d-29) | 254 | ---- | ---- | ---- | ---- | ---- |
| TeBP1.p-tlr1502              | (5.0d-29) | 245 | ---- | ---- | ---- | ---- | ---- |
| S7942.p-Synpcc7942_0684      | (4.0d-26) | 249 | ---- | ---- | ---- | ---- | ---- |
| syx.p-SynWH7803_1861         | (7.0d-30) | 250 | ---- | ---- | ---- | ---- | ---- |
| S7805.p-WH7805_13603         | (5.0d-28) | 250 | ---- | ---- | ---- | ---- | ---- |
| S9916.p-RS9916_33507         | (8.0d-31) | 250 | ---- | ---- | ---- | ---- | ---- |
| Ssp-RS9917.p-Ssp-RS9917-1614 | (2.0d-29) | 308 | ---- | ---- | ---- | ---- | ---- |
| S9917.p-RS9917_09056         | (3.0d-29) | 250 | ---- | ---- | ---- | ---- | ---- |
| syg.p-sync_2137              | (4.0d-29) | 250 | ---- | ---- | ---- | ---- | ---- |
| P9313.p-PMT1333              | (6.0d-29) | 250 | ---- | ---- | ---- | ---- | ---- |
| pmf.p-P9303_06521            | (1.0d-28) | 262 | ---- | ---- | ---- | ---- | ---- |
| S107.p-BL107_09856           | (2.0d-28) | 267 | ---- | ---- | ---- | ---- | ---- |
| S9902.p-Syncc9902_1745       | (4.0d-28) | 250 | ---- | ---- | ---- | ---- | ---- |
| S9605.p-Syncc9605_0617       | (4.0d-27) | 264 | ---- | ---- | ---- | ---- | ---- |
| S8102.p-SynW1852             | (9.0d-28) | 250 | ---- | ---- | ---- | ---- | ---- |
| syr.p-SynRCC307_0681         | (2.0d-28) | 250 | ---- | ---- | ---- | ---- | ---- |
| S5701.p-WH5701_07809         | (1.0d-28) | 252 | ---- | ---- | ---- | ---- | ---- |
| pmn.p-PMN2A_1785             | (5.0d-28) | 250 | ---- | ---- | ---- | ---- | ---- |
| pme.p-NATL1_05081            | (1.0d-27) | 250 | ---- | ---- | ---- | ---- | ---- |

|                          |           |     |       |       |       |       |       |
|--------------------------|-----------|-----|-------|-------|-------|-------|-------|
| pmz.p-p9211?06582        | (1.0d-27) | 250 | ----- | ----- | ----- | ----- | ----- |
| PRO1375.p-Pro0452        | (7.0d-27) | 250 | ----- | ----- | ----- | ----- | ----- |
| Gvi.p-glr3506            | (5.0d-28) | 248 | ----- | ----- | ----- | ----- | ----- |
| pmb.p-P9601_05091        | (9.0d-28) | 249 | ----- | ----- | ----- | ----- | ----- |
| pmi.p-PMT9312_0453       | (1.0d-27) | 249 | ----- | ----- | ----- | ----- | ----- |
| pmg.p-P9301_04781        | (1.0d-27) | 249 | ----- | ----- | ----- | ----- | ----- |
| PMED4.p-PMM0453          | (9.0d-28) | 249 | ----- | ----- | ----- | ----- | ----- |
| pmc.p-P9515_05161        | (2.0d-27) | 249 | ----- | ----- | ----- | ----- | ----- |
| Npun.p-NpR0578           | (6.0d-27) | 257 | ----- | ----- | ----- | ----- | ----- |
| Cyl-7417.p-Cyl-7417-0303 | (5.0d-26) | 266 | ----- | ----- | ----- | ----- | ----- |
| Npun.p-NpF2231           | (1.0d-26) | 257 | ----- | ----- | ----- | ----- | ----- |
| Cyl-7417.p-Cyl-7417-3400 | (1.0d-26) | 249 | ----- | ----- | ----- | ----- | ----- |
| Acyl-7122.p-acyl-3225    | (4.0d-28) | 241 | ----- | ----- | ----- | ----- | ----- |
| Nsp-0708.p-Nsp-0708-2459 | (6.0d-26) | 241 | ----- | ----- | ----- | ----- | ----- |
| Ana-90.p-ana90-1189      | (1.0d-28) | 241 | ----- | ----- | ----- | ----- | ----- |
| Cyl-505.p-Cyl-505-2036   | (2.0d-32) | 241 | ----- | ----- | ----- | ----- | ----- |
| A29413.p-Ava2536         | (2.0d-28) | 241 | ----- | ----- | ----- | ----- | ----- |
| A7120.p-Alr5286          | (2.0d-28) | 255 | ----- | ----- | ----- | ----- | ----- |
| N-7524.p-N-7524-4179     | (1.0d-27) | 241 | ----- | ----- | ----- | ----- | ----- |
| MAST-10914-SCAD-C        |           | 245 | ----- | ----- | ----- | ----- | ----- |
| Cyl-7417.p-Cyl-7417-1063 | (4.0d-30) | 241 | ----- | ----- | ----- | ----- | ----- |
| nod.p-n9414?21215        | (5.0d-26) | 240 | ----- | ----- | ----- | ----- | ----- |
| N-7107.p-N-7107-1008     | (2.0d-29) | 241 | ----- | ----- | ----- | ----- | ----- |
| M7126-SCAD-A             |           | 241 | ----- | ----- | ----- | ----- | ----- |
| R7116-SCAD-B             |           | 240 | ----- | ----- | ----- | ----- | ----- |
| lyn.p-18106?23630        | (2.0d-26) | 241 | ----- | ----- | ----- | ----- | ----- |
| Amar.p-AM1_5634          | (3.0d-27) | 241 | ----- | ----- | ----- | ----- | ----- |
| cyb.p-CYB_0189           | (1.0d-27) | 243 | ----- | ----- | ----- | ----- | ----- |
| cya.p-CYA_2793           | (8.0d-26) | 241 | ----- | ----- | ----- | ----- | ----- |
| M7126-SCAD-D             |           | 237 | ----- | ----- | ----- | ----- | ----- |
| cyb.p-CYB_0005           | (4.0d-34) | 291 | ----- | ----- | ----- | ----- | ----- |
| cya.p-CYA_0005           | (2.0d-33) | 291 | ----- | ----- | ----- | ----- | ----- |
| N-7107.p-N-7107-5182     | (3.0d-28) | 249 | ----- | ----- | ----- | ----- | ----- |
| Npun.p-NpR3707           | (3.0d-27) | 249 | ----- | ----- | ----- | ----- | ----- |
| Acyl-7122.p-acyl-1205    | (2.0d-26) | 274 | ----- | ----- | ----- | ----- | ----- |
| R7116-SCAD-F             |           | 267 | ----- | ----- | ----- | ----- | ----- |
| Npun.p-NpF0204           | (3.0d-28) | 337 | ----- | ----- | ----- | ----- | ----- |
| MAST-10914-SCAD-D        |           | 271 | ----- | ----- | ----- | ----- | ----- |
| Cal-6303.p-Cal-6303-3407 | (1.0d-27) | 269 | ----- | ----- | ----- | ----- | ----- |
| Ana-90.p-ana90-4359      | (1.0d-27) | 263 | ----- | ----- | ----- | ----- | ----- |

|                          |            |     |            |            |            |            |            |
|--------------------------|------------|-----|------------|------------|------------|------------|------------|
| Cyl-7417.p-Cyl-7417-4762 | (6.0d-27)  | 292 | -----      | -----      | -----      | -----      | -----      |
| Nsp-0708.p-Nsp-0708-3536 | (2.0d-26)  | 290 | -----      | -----      | -----      | -----      | -----      |
| N-7107.p-N-7107-1296     | (2.0d-26)  | 291 | -----      | -----      | -----      | -----      | -----      |
| Npun.p-NpR1019           | (4.0d-26)  | 290 | -----      | -----      | -----      | -----      | -----      |
| N-7524.p-N-7524-4265     | (1.0d-25)  | 290 | -----      | -----      | -----      | -----      | -----      |
| M7126-SCAD-E             |            | 285 | -----      | -----      | -----      | -----      | -----      |
| R7116-SCAD-E             |            | 276 | -----      | -----      | -----      | -----      | -----      |
| cyt.p-cce_3588           | (3.0d-27)  | 276 | -----      | -----      | -----      | -----      | -----      |
| ctc.p-c0110?06289        | (2.0d-26)  | 275 | -----      | -----      | -----      | -----      | -----      |
| cyr.p-c8801?0598         | (2.0d-26)  | 274 | -----      | -----      | -----      | -----      | -----      |
| Amar.p-AM1_6363          | (1.0d-30)  | 268 | -----      | -----      | -----      | -----      | -----      |
| Amar.p-AM1_0210          | (1.0d-27)  | 279 | -----      | -----      | -----      | -----      | -----      |
| lyn.p-l8106?00785        | (4.0d-31)  | 270 | -----      | -----      | -----      | -----      | -----      |
| ter.p-Tery_3453          | (8.0d-31)  | 267 | -----      | -----      | -----      | -----      | -----      |
| A29413.p-Ava0943         | (1.0d-30)  | 293 | -----      | -----      | -----      | -----      | -----      |
| A7120.p-Al12963          | (5.0d-29)  | 293 | -----      | -----      | -----      | -----      | -----      |
| Npun.p-NpR4797           | (3.0d-30)  | 272 | -----      | -----      | -----      | -----      | -----      |
| Cyl-7417.p-Cyl-7417-4424 | (3.0d-30)  | 271 | -----      | -----      | -----      | -----      | -----      |
| MAST-10914-SCAD-E        |            | 272 | -----      | -----      | -----      | -----      | -----      |
| M7126-SCAD-C             |            | 272 | -----      | -----      | -----      | -----      | -----      |
| R7116-SCAD-D             |            | 266 | -----      | -----      | -----      | -----      | -----      |
| Npun.p-NpF0199           | (2.0d-29)  | 508 | AYRHHQIQLI | DEQSAQEISP | EMPQVYQDIK | QTLGVPIVNS | DYQALARWPA |
| A7120.p-Alr5358          | (3.0d-156) | 287 | -----      | -----      | -----      | -----      | -----      |
| A29413.p-Ava2596         | (8.0d-151) | 287 | -----      | -----      | -----      | -----      | -----      |
| N-7524.p-N-7524-5224     | (2.0d-121) | 285 | -----      | -----      | -----      | -----      | -----      |
| Cyl-7417.p-Cyl-7417-1544 | (2.0d-100) | 284 | -----      | -----      | -----      | -----      | -----      |
| MAST-10914-SCAD-A        |            | 277 | -----      | -----      | -----      | -----      | -----      |
| N-7524.p-N-7524-5355     | (2.0d-74)  | 267 | -----      | -----      | -----      | -----      | -----      |
| Npun.p-NpF3363           | (2.0d-81)  | 285 | -----      | -----      | -----      | -----      | -----      |
| R7116-SCAD-A             |            | 280 | -----      | -----      | -----      | -----      | -----      |
| cyr.p-c8801?3820         | (4.0d-26)  | 261 | -----      | -----      | -----      | -----      | -----      |
| A7120.p-Al11418          | (8.0d-26)  | 277 | -----      | -----      | -----      | -----      | -----      |
| consensus                |            | 551 | -----      | -----      | -----      | -----      | -----      |

|                              |           |     |       |       |       |       |       |
|------------------------------|-----------|-----|-------|-------|-------|-------|-------|
| A7120.p-Alr1894              | (1.0d-26) | 251 | ----- | ----- | ----- | ----- | ----- |
| A29413.p-Ava3764             | (1.0d-26) | 251 | ----- | ----- | ----- | ----- | ----- |
| N-7524.p-N-7524-0010         | (9.0d-30) | 250 | ----- | ----- | ----- | ----- | ----- |
| M7126-SCAD-B                 |           | 255 | ----- | ----- | ----- | ----- | ----- |
| nod.p-n9414?22428            | (4.0d-28) | 248 | ----- | ----- | ----- | ----- | ----- |
| MAST-10914-SCAD-B            |           | 255 | ----- | ----- | ----- | ----- | ----- |
| Cal-6303.p-Cal-6303-1520     | (5.0d-28) | 255 | ----- | ----- | ----- | ----- | ----- |
| Npun.p-NpF2349               | (4.0d-29) | 248 | ----- | ----- | ----- | ----- | ----- |
| N-7107.p-N-7107-0937         | (1.0d-27) | 254 | ----- | ----- | ----- | ----- | ----- |
| Ana-90.p-ana90-1712          | (1.0d-28) | 246 | ----- | ----- | ----- | ----- | ----- |
| Acyl-7122.p-acyl-4545        | (9.0d-28) | 246 | ----- | ----- | ----- | ----- | ----- |
| Nsp-0708.p-Nsp-0708-2353     | (9.0d-27) | 246 | ----- | ----- | ----- | ----- | ----- |
| Cyl-505.p-Cyl-505-0204       | (2.0d-28) | 246 | ----- | ----- | ----- | ----- | ----- |
| Cyl-7417.p-Cyl-7417-2349     | (6.0d-29) | 254 | ----- | ----- | ----- | ----- | ----- |
| R7116-SCAD-C                 |           | 254 | ----- | ----- | ----- | ----- | ----- |
| ter.p-Tery_3438              | (2.0d-28) | 252 | ----- | ----- | ----- | ----- | ----- |
| lyn.p-l8106?21814            | (1.0d-27) | 255 | ----- | ----- | ----- | ----- | ----- |
| Amar.p-AM1_5632              | (1.0d-26) | 247 | ----- | ----- | ----- | ----- | ----- |
| cyr.p-c8801?2930             | (1.0d-28) | 250 | ----- | ----- | ----- | ----- | ----- |
| S6803.p-Slr0886              | (4.0d-27) | 247 | ----- | ----- | ----- | ----- | ----- |
| mae.p-MAE_33900              | (3.0d-29) | 254 | ----- | ----- | ----- | ----- | ----- |
| TeBP1.p-tlr1502              | (5.0d-29) | 245 | ----- | ----- | ----- | ----- | ----- |
| S7942.p-Synpcc7942_0684      | (4.0d-26) | 249 | ----- | ----- | ----- | ----- | ----- |
| syx.p-SynWH7803_1861         | (7.0d-30) | 250 | ----- | ----- | ----- | ----- | ----- |
| S7805.p-WH7805_13603         | (5.0d-28) | 250 | ----- | ----- | ----- | ----- | ----- |
| S9916.p-RS9916_33507         | (8.0d-31) | 250 | ----- | ----- | ----- | ----- | ----- |
| Ssp-RS9917.p-Ssp-RS9917-1614 | (2.0d-29) | 308 | ----- | ----- | ----- | ----- | ----- |
| S9917.p-RS9917_09056         | (3.0d-29) | 250 | ----- | ----- | ----- | ----- | ----- |
| syg.p-sync_2137              | (4.0d-29) | 250 | ----- | ----- | ----- | ----- | ----- |
| P9313.p-PMT1333              | (6.0d-29) | 250 | ----- | ----- | ----- | ----- | ----- |
| pmf.p-P9303_06521            | (1.0d-28) | 262 | ----- | ----- | ----- | ----- | ----- |
| S107.p-BL107_09856           | (2.0d-28) | 267 | ----- | ----- | ----- | ----- | ----- |
| S9902.p-Syncc9902_1745       | (4.0d-28) | 250 | ----- | ----- | ----- | ----- | ----- |
| S9605.p-Syncc9605_0617       | (4.0d-27) | 264 | ----- | ----- | ----- | ----- | ----- |
| S8102.p-SynW1852             | (9.0d-28) | 250 | ----- | ----- | ----- | ----- | ----- |
| syr.p-SynRCC307_0681         | (2.0d-28) | 250 | ----- | ----- | ----- | ----- | ----- |
| S5701.p-WH5701_07809         | (1.0d-28) | 252 | ----- | ----- | ----- | ----- | ----- |
| pmn.p-PMN2A_1785             | (5.0d-28) | 250 | ----- | ----- | ----- | ----- | ----- |
| pme.p-NATL1_05081            | (1.0d-27) | 250 | ----- | ----- | ----- | ----- | ----- |

|                          |           |     |       |       |       |       |       |
|--------------------------|-----------|-----|-------|-------|-------|-------|-------|
| pmz.p-p9211?06582        | (1.0d-27) | 250 | ----- | ----- | ----- | ----- | ----- |
| PRO1375.p-Pro0452        | (7.0d-27) | 250 | ----- | ----- | ----- | ----- | ----- |
| Gvi.p-glr3506            | (5.0d-28) | 248 | ----- | ----- | ----- | ----- | ----- |
| pmb.p-P9601_05091        | (9.0d-28) | 249 | ----- | ----- | ----- | ----- | ----- |
| pmi.p-PMT9312_0453       | (1.0d-27) | 249 | ----- | ----- | ----- | ----- | ----- |
| pmg.p-P9301_04781        | (1.0d-27) | 249 | ----- | ----- | ----- | ----- | ----- |
| PMED4.p-PMM0453          | (9.0d-28) | 249 | ----- | ----- | ----- | ----- | ----- |
| pmc.p-P9515_05161        | (2.0d-27) | 249 | ----- | ----- | ----- | ----- | ----- |
| Npun.p-NpR0578           | (6.0d-27) | 257 | ----- | ----- | ----- | ----- | ----- |
| Cyl-7417.p-Cyl-7417-0303 | (5.0d-26) | 266 | ----- | ----- | ----- | ----- | ----- |
| Npun.p-NpF2231           | (1.0d-26) | 257 | ----- | ----- | ----- | ----- | ----- |
| Cyl-7417.p-Cyl-7417-3400 | (1.0d-26) | 249 | ----- | ----- | ----- | ----- | ----- |
| Acyl-7122.p-acyl-3225    | (4.0d-28) | 241 | ----- | ----- | ----- | ----- | ----- |
| Nsp-0708.p-Nsp-0708-2459 | (6.0d-26) | 241 | ----- | ----- | ----- | ----- | ----- |
| Ana-90.p-ana90-1189      | (1.0d-28) | 241 | ----- | ----- | ----- | ----- | ----- |
| Cyl-505.p-Cyl-505-2036   | (2.0d-32) | 241 | ----- | ----- | ----- | ----- | ----- |
| A29413.p-Ava2536         | (2.0d-28) | 241 | ----- | ----- | ----- | ----- | ----- |
| A7120.p-Alr5286          | (2.0d-28) | 255 | ----- | ----- | ----- | ----- | ----- |
| N-7524.p-N-7524-4179     | (1.0d-27) | 241 | ----- | ----- | ----- | ----- | ----- |
| MAST-10914-SCAD-C        |           | 245 | ----- | ----- | ----- | ----- | ----- |
| Cyl-7417.p-Cyl-7417-1063 | (4.0d-30) | 241 | ----- | ----- | ----- | ----- | ----- |
| nod.p-n9414?21215        | (5.0d-26) | 240 | ----- | ----- | ----- | ----- | ----- |
| N-7107.p-N-7107-1008     | (2.0d-29) | 241 | ----- | ----- | ----- | ----- | ----- |
| M7126-SCAD-A             |           | 241 | ----- | ----- | ----- | ----- | ----- |
| R7116-SCAD-B             |           | 240 | ----- | ----- | ----- | ----- | ----- |
| lyn.p-18106?23630        | (2.0d-26) | 241 | ----- | ----- | ----- | ----- | ----- |
| Amar.p-AM1_5634          | (3.0d-27) | 241 | ----- | ----- | ----- | ----- | ----- |
| cyb.p-CYB_0189           | (1.0d-27) | 243 | ----- | ----- | ----- | ----- | ----- |
| cya.p-CYA_2793           | (8.0d-26) | 241 | ----- | ----- | ----- | ----- | ----- |
| M7126-SCAD-D             |           | 237 | ----- | ----- | ----- | ----- | ----- |
| cyb.p-CYB_0005           | (4.0d-34) | 291 | ----- | ----- | ----- | ----- | ----- |
| cya.p-CYA_0005           | (2.0d-33) | 291 | ----- | ----- | ----- | ----- | ----- |
| N-7107.p-N-7107-5182     | (3.0d-28) | 249 | ----- | ----- | ----- | ----- | ----- |
| Npun.p-NpR3707           | (3.0d-27) | 249 | ----- | ----- | ----- | ----- | ----- |
| Acyl-7122.p-acyl-1205    | (2.0d-26) | 274 | ----- | ----- | ----- | ----- | ----- |
| R7116-SCAD-F             |           | 267 | ----- | ----- | ----- | ----- | ----- |
| Npun.p-NpF0204           | (3.0d-28) | 337 | ----- | ----- | ----- | ----- | ----- |
| MAST-10914-SCAD-D        |           | 271 | ----- | ----- | ----- | ----- | ----- |
| Cal-6303.p-Cal-6303-3407 | (1.0d-27) | 269 | ----- | ----- | ----- | ----- | ----- |
| Ana-90.p-ana90-4359      | (1.0d-27) | 263 | ----- | ----- | ----- | ----- | ----- |

|                          |            |     |             |            |            |            |            |
|--------------------------|------------|-----|-------------|------------|------------|------------|------------|
| Cyl-7417.p-Cyl-7417-4762 | (6.0d-27)  | 292 | -----       | -----      | -----      | -----      | -----      |
| Nsp-0708.p-Nsp-0708-3536 | (2.0d-26)  | 290 | -----       | -----      | -----      | -----      | -----      |
| N-7107.p-N-7107-1296     | (2.0d-26)  | 291 | -----       | -----      | -----      | -----      | -----      |
| Npun.p-NpR1019           | (4.0d-26)  | 290 | -----       | -----      | -----      | -----      | -----      |
| N-7524.p-N-7524-4265     | (1.0d-25)  | 290 | -----       | -----      | -----      | -----      | -----      |
| M7126-SCAD-E             |            | 285 | -----       | -----      | -----      | -----      | -----      |
| R7116-SCAD-E             |            | 276 | -----       | -----      | -----      | -----      | -----      |
| cyt.p-cce_3588           | (3.0d-27)  | 276 | -----       | -----      | -----      | -----      | -----      |
| ctc.p-c0110?06289        | (2.0d-26)  | 275 | -----       | -----      | -----      | -----      | -----      |
| cyr.p-c8801?0598         | (2.0d-26)  | 274 | -----       | -----      | -----      | -----      | -----      |
| Amar.p-AM1_6363          | (1.0d-30)  | 268 | -----       | -----      | -----      | -----      | -----      |
| Amar.p-AM1_0210          | (1.0d-27)  | 279 | -----       | -----      | -----      | -----      | -----      |
| lyn.p-l8106?00785        | (4.0d-31)  | 270 | -----       | -----      | -----      | -----      | -----      |
| ter.p-Tery_3453          | (8.0d-31)  | 267 | -----       | -----      | -----      | -----      | -----      |
| A29413.p-Ava0943         | (1.0d-30)  | 293 | -----       | -----      | -----      | -----      | -----      |
| A7120.p-Al12963          | (5.0d-29)  | 293 | -----       | -----      | -----      | -----      | -----      |
| Npun.p-NpR4797           | (3.0d-30)  | 272 | -----       | -----      | -----      | -----      | -----      |
| Cyl-7417.p-Cyl-7417-4424 | (3.0d-30)  | 271 | -----       | -----      | -----      | -----      | -----      |
| MAST-10914-SCAD-E        |            | 272 | -----       | -----      | -----      | -----      | -----      |
| M7126-SCAD-C             |            | 272 | -----       | -----      | -----      | -----      | -----      |
| R7116-SCAD-D             |            | 266 | -----       | -----      | -----      | -----      | -----      |
| Npun.p-NpF0199           | (2.0d-29)  | 558 | FFLAAWS DIK | VWRERPEYQL | LVQDVVQKAE | EAASRLSPAV | WVGEREVEDI |
| A7120.p-Alr5358          | (3.0d-156) | 287 | -----       | -----      | -----      | -----      | -----      |
| A29413.p-Ava2596         | (8.0d-151) | 287 | -----       | -----      | -----      | -----      | -----      |
| N-7524.p-N-7524-5224     | (2.0d-121) | 285 | -----       | -----      | -----      | -----      | -----      |
| Cyl-7417.p-Cyl-7417-1544 | (2.0d-100) | 284 | -----       | -----      | -----      | -----      | -----      |
| MAST-10914-SCAD-A        |            | 277 | -----       | -----      | -----      | -----      | -----      |
| N-7524.p-N-7524-5355     | (2.0d-74)  | 267 | -----       | -----      | -----      | -----      | -----      |
| Npun.p-NpF3363           | (2.0d-81)  | 285 | -----       | -----      | -----      | -----      | -----      |
| R7116-SCAD-A             |            | 280 | -----       | -----      | -----      | -----      | -----      |
| cyr.p-c8801?3820         | (4.0d-26)  | 261 | -----       | -----      | -----      | -----      | -----      |
| A7120.p-Al11418          | (8.0d-26)  | 277 | -----       | -----      | -----      | -----      | -----      |
| consensus                |            | 601 | -----       | -----      | -----      | -----      | -----      |

|                              |           |     |       |       |       |       |       |
|------------------------------|-----------|-----|-------|-------|-------|-------|-------|
| A7120.p-Alr1894              | (1.0d-26) | 252 | ----- | ----- | ----- | ----- | ----- |
| A29413.p-Ava3764             | (1.0d-26) | 252 | ----- | ----- | ----- | ----- | ----- |
| N-7524.p-N-7524-0010         | (9.0d-30) | 251 | ----- | ----- | ----- | ----- | ----- |
| M7126-SCAD-B                 |           | 256 | ----- | ----- | ----- | ----- | ----- |
| nod.p-n9414?22428            | (4.0d-28) | 249 | ----- | ----- | ----- | ----- | ----- |
| MAST-10914-SCAD-B            |           | 256 | ----- | ----- | ----- | ----- | ----- |
| Cal-6303.p-Cal-6303-1520     | (5.0d-28) | 256 | ----- | ----- | ----- | ----- | ----- |
| Npun.p-NpF2349               | (4.0d-29) | 249 | ----- | ----- | ----- | ----- | ----- |
| N-7107.p-N-7107-0937         | (1.0d-27) | 255 | ----- | ----- | ----- | ----- | ----- |
| Ana-90.p-ana90-1712          | (1.0d-28) | 247 | ----- | ----- | ----- | ----- | ----- |
| Acyl-7122.p-acyl-4545        | (9.0d-28) | 247 | ----- | ----- | ----- | ----- | ----- |
| Nsp-0708.p-Nsp-0708-2353     | (9.0d-27) | 247 | ----- | ----- | ----- | ----- | ----- |
| Cyl-505.p-Cyl-505-0204       | (2.0d-28) | 247 | ----- | ----- | ----- | ----- | ----- |
| Cyl-7417.p-Cyl-7417-2349     | (6.0d-29) | 255 | ----- | ----- | ----- | ----- | ----- |
| R7116-SCAD-C                 |           | 255 | ----- | ----- | ----- | ----- | ----- |
| ter.p-Tery_3438              | (2.0d-28) | 253 | ----- | ----- | ----- | ----- | ----- |
| lyn.p-l8106?21814            | (1.0d-27) | 256 | ----- | ----- | ----- | ----- | ----- |
| Amar.p-AM1_5632              | (1.0d-26) | 248 | ----- | ----- | ----- | ----- | ----- |
| cyr.p-c8801?2930             | (1.0d-28) | 251 | ----- | ----- | ----- | ----- | ----- |
| S6803.p-Slr0886              | (4.0d-27) | 248 | ----- | ----- | ----- | ----- | ----- |
| mae.p-MAE_33900              | (3.0d-29) | 255 | ----- | ----- | ----- | ----- | ----- |
| TeBP1.p-tlr1502              | (5.0d-29) | 246 | ----- | ----- | ----- | ----- | ----- |
| S7942.p-Syncpcc7942_0684     | (4.0d-26) | 250 | ----- | ----- | ----- | ----- | ----- |
| syx.p-SynWH7803_1861         | (7.0d-30) | 251 | ----- | ----- | ----- | ----- | ----- |
| S7805.p-WH7805_13603         | (5.0d-28) | 251 | ----- | ----- | ----- | ----- | ----- |
| S9916.p-RS9916_33507         | (8.0d-31) | 251 | ----- | ----- | ----- | ----- | ----- |
| Ssp-RS9917.p-Ssp-RS9917-1614 | (2.0d-29) | 309 | ----- | ----- | ----- | ----- | ----- |
| S9917.p-RS9917_09056         | (3.0d-29) | 251 | ----- | ----- | ----- | ----- | ----- |
| syg.p-sync_2137              | (4.0d-29) | 251 | ----- | ----- | ----- | ----- | ----- |
| P9313.p-PMT1333              | (6.0d-29) | 251 | ----- | ----- | ----- | ----- | ----- |
| pmf.p-P9303_06521            | (1.0d-28) | 263 | ----- | ----- | ----- | ----- | ----- |
| S107.p-BL107_09856           | (2.0d-28) | 268 | ----- | ----- | ----- | ----- | ----- |
| S9902.p-Sync9902_1745        | (4.0d-28) | 251 | ----- | ----- | ----- | ----- | ----- |
| S9605.p-Sync9605_0617        | (4.0d-27) | 265 | ----- | ----- | ----- | ----- | ----- |
| S8102.p-SynW1852             | (9.0d-28) | 251 | ----- | ----- | ----- | ----- | ----- |
| syr.p-SynRCC307_0681         | (2.0d-28) | 251 | ----- | ----- | ----- | ----- | ----- |
| S5701.p-WH5701_07809         | (1.0d-28) | 253 | ----- | ----- | ----- | ----- | ----- |
| pmn.p-PMN2A_1785             | (5.0d-28) | 251 | ----- | ----- | ----- | ----- | ----- |
| pme.p-NATL1_05081            | (1.0d-27) | 251 | ----- | ----- | ----- | ----- | ----- |



|                          |           |     |       |       |       |       |       |
|--------------------------|-----------|-----|-------|-------|-------|-------|-------|
| pmz.p-p9211?06582        | (1.0d-27) | 251 | ----- | ----- | ----- | ----- | ----- |
| PRO1375.p-Pro0452        | (7.0d-27) | 251 | ----- | ----- | ----- | ----- | ----- |
| Gvi.p-glr3506            | (5.0d-28) | 249 | ----- | ----- | ----- | ----- | ----- |
| pmb.p-P9601_05091        | (9.0d-28) | 250 | ----- | ----- | ----- | ----- | ----- |
| pmi.p-PMT9312_0453       | (1.0d-27) | 250 | ----- | ----- | ----- | ----- | ----- |
| pmg.p-P9301_04781        | (1.0d-27) | 250 | ----- | ----- | ----- | ----- | ----- |
| PMED4.p-PMM0453          | (9.0d-28) | 250 | ----- | ----- | ----- | ----- | ----- |
| pmc.p-P9515_05161        | (2.0d-27) | 250 | ----- | ----- | ----- | ----- | ----- |
| Npun.p-NpR0578           | (6.0d-27) | 258 | ----- | ----- | ----- | ----- | ----- |
| Cyl-7417.p-Cyl-7417-0303 | (5.0d-26) | 267 | ----- | ----- | ----- | ----- | ----- |
| Npun.p-NpF2231           | (1.0d-26) | 258 | ----- | ----- | ----- | ----- | ----- |
| Cyl-7417.p-Cyl-7417-3400 | (1.0d-26) | 250 | ----- | ----- | ----- | ----- | ----- |
| Acyl-7122.p-acyl-3225    | (4.0d-28) | 242 | ----- | ----- | ----- | ----- | ----- |
| Nsp-0708.p-Nsp-0708-2459 | (6.0d-26) | 242 | ----- | ----- | ----- | ----- | ----- |
| Ana-90.p-ana90-1189      | (1.0d-28) | 242 | ----- | ----- | ----- | ----- | ----- |
| Cyl-505.p-Cyl-505-2036   | (2.0d-32) | 242 | ----- | ----- | ----- | ----- | ----- |
| A29413.p-Ava2536         | (2.0d-28) | 242 | ----- | ----- | ----- | ----- | ----- |
| A7120.p-Alr5286          | (2.0d-28) | 256 | ----- | ----- | ----- | ----- | ----- |
| N-7524.p-N-7524-4179     | (1.0d-27) | 242 | ----- | ----- | ----- | ----- | ----- |
| MAST-10914-SCAD-C        |           | 246 | ----- | ----- | ----- | ----- | ----- |
| Cyl-7417.p-Cyl-7417-1063 | (4.0d-30) | 242 | ----- | ----- | ----- | ----- | ----- |
| nod.p-n9414?21215        | (5.0d-26) | 241 | ----- | ----- | ----- | ----- | ----- |
| N-7107.p-N-7107-1008     | (2.0d-29) | 242 | ----- | ----- | ----- | ----- | ----- |
| M7126-SCAD-A             |           | 242 | ----- | ----- | ----- | ----- | ----- |
| R7116-SCAD-B             |           | 241 | ----- | ----- | ----- | ----- | ----- |
| lyn.p-18106?23630        | (2.0d-26) | 242 | ----- | ----- | ----- | ----- | ----- |
| Amar.p-AM1_5634          | (3.0d-27) | 242 | ----- | ----- | ----- | ----- | ----- |
| cyb.p-CYB_0189           | (1.0d-27) | 244 | ----- | ----- | ----- | ----- | ----- |
| cya.p-CYA_2793           | (8.0d-26) | 242 | ----- | ----- | ----- | ----- | ----- |
| M7126-SCAD-D             |           | 238 | ----- | ----- | ----- | ----- | ----- |
| cyb.p-CYB_0005           | (4.0d-34) | 292 | ----- | ----- | ----- | ----- | ----- |
| cya.p-CYA_0005           | (2.0d-33) | 292 | ----- | ----- | ----- | ----- | ----- |
| N-7107.p-N-7107-5182     | (3.0d-28) | 250 | ----- | ----- | ----- | ----- | ----- |
| Npun.p-NpR3707           | (3.0d-27) | 250 | ----- | ----- | ----- | ----- | ----- |
| Acyl-7122.p-acyl-1205    | (2.0d-26) | 275 | ----- | ----- | ----- | ----- | ----- |
| R7116-SCAD-F             |           | 268 | ----- | ----- | ----- | ----- | ----- |
| Npun.p-NpF0204           | (3.0d-28) | 338 | ----- | ----- | ----- | ----- | ----- |
| MAST-10914-SCAD-D        |           | 272 | ----- | ----- | ----- | ----- | ----- |
| Cal-6303.p-Cal-6303-3407 | (1.0d-27) | 270 | ----- | ----- | ----- | ----- | ----- |
| Ana-90.p-ana90-4359      | (1.0d-27) | 264 | ----- | ----- | ----- | ----- | ----- |

|                          |            |     |            |            |            |            |           |
|--------------------------|------------|-----|------------|------------|------------|------------|-----------|
| Cyl-7417.p-Cyl-7417-4762 | (6.0d-27)  | 293 | -----      | -----      | -----      | -----      | -----     |
| Nsp-0708.p-Nsp-0708-3536 | (2.0d-26)  | 291 | -----      | -----      | -----      | -----      | -----     |
| N-7107.p-N-7107-1296     | (2.0d-26)  | 292 | -----      | -----      | -----      | -----      | -----     |
| Npun.p-NpR1019           | (4.0d-26)  | 291 | -----      | -----      | -----      | -----      | -----     |
| N-7524.p-N-7524-4265     | (1.0d-25)  | 291 | -----      | -----      | -----      | -----      | -----     |
| M7126-SCAD-E             |            | 286 | -----      | -----      | -----      | -----      | -----     |
| R7116-SCAD-E             |            | 277 | -----      | -----      | -----      | -----      | -----     |
| cyt.p-cce_3588           | (3.0d-27)  | 277 | -----      | -----      | -----      | -----      | -----     |
| ctc.p-c0110?06289        | (2.0d-26)  | 276 | -----      | -----      | -----      | -----      | -----     |
| cyr.p-c8801?0598         | (2.0d-26)  | 275 | -----      | -----      | -----      | -----      | -----     |
| Amar.p-AM1_6363          | (1.0d-30)  | 269 | -----      | -----      | -----      | -----      | -----     |
| Amar.p-AM1_0210          | (1.0d-27)  | 280 | -----      | -----      | -----      | -----      | -----     |
| lyn.p-l8106?00785        | (4.0d-31)  | 271 | -----      | -----      | -----      | -----      | -----     |
| ter.p-Tery_3453          | (8.0d-31)  | 268 | -----      | -----      | -----      | -----      | -----     |
| A29413.p-Ava0943         | (1.0d-30)  | 294 | -----      | -----      | -----      | -----      | -----     |
| A7120.p-Al12963          | (5.0d-29)  | 294 | -----      | -----      | -----      | -----      | -----     |
| Npun.p-NpR4797           | (3.0d-30)  | 273 | -----      | -----      | -----      | -----      | -----     |
| Cyl-7417.p-Cyl-7417-4424 | (3.0d-30)  | 272 | -----      | -----      | -----      | -----      | -----     |
| MAST-10914-SCAD-E        |            | 273 | -----      | -----      | -----      | -----      | -----     |
| M7126-SCAD-C             |            | 273 | -----      | -----      | -----      | -----      | -----     |
| R7116-SCAD-D             |            | 267 | -----      | -----      | -----      | -----      | -----     |
| Npun.p-NpF0199           | (2.0d-29)  | 608 | LDNPDNFEQI | QQMVQMFKDI | LPELIVQNAL | FHFGLRRVQS | VKGIGSSQL |
| A7120.p-Alr5358          | (3.0d-156) | 288 | -----      | -----      | -----      | -----      | -----     |
| A29413.p-Ava2596         | (8.0d-151) | 288 | -----      | -----      | -----      | -----      | -----     |
| N-7524.p-N-7524-5224     | (2.0d-121) | 286 | -----      | -----      | -----      | -----      | -----     |
| Cyl-7417.p-Cyl-7417-1544 | (2.0d-100) | 285 | -----      | -----      | -----      | -----      | -----     |
| MAST-10914-SCAD-A        |            | 278 | -----      | -----      | -----      | -----      | -----     |
| N-7524.p-N-7524-5355     | (2.0d-74)  | 268 | -----      | -----      | -----      | -----      | -----     |
| Npun.p-NpF3363           | (2.0d-81)  | 286 | -----      | -----      | -----      | -----      | -----     |
| R7116-SCAD-A             |            | 281 | -----      | -----      | -----      | -----      | -----     |
| cyr.p-c8801?3820         | (4.0d-26)  | 262 | -----      | -----      | -----      | -----      | -----     |
| A7120.p-Al11418          | (8.0d-26)  | 278 | -----      | -----      | -----      | -----      | -----     |
| consensus                |            | 651 | -----      | -----      | -----      | -----      | -----     |

**Supplemental Fig. 1: Alignment of HetN-like proteins.** The sequences of proteins similar to HetN (Alr5358) with an E-value  $< 10^{25}$  were aligned, considering only positions without gaps, using Clustal. Names consist of an abbreviation of the organism (see Suppl. Table 1), a gene name, and the E-value of a Blast using HetN as the query. E-values for HetN-like proteins from *Mastigocladopsis repens* (MAST-10914) and *Rivularia* PCC 7116 (R7116) are not shown as they were found

by a separate Blast, and their E-values are not comparable to those of the other proteins. Proteins from these organisms were given unofficial names (SCAD, for Short Chain Alcohol Dehydrogenase). Red boxes highlight the RGSGR motif.

# Supplemental Figure 2: Phylogeny of HetN-like proteins

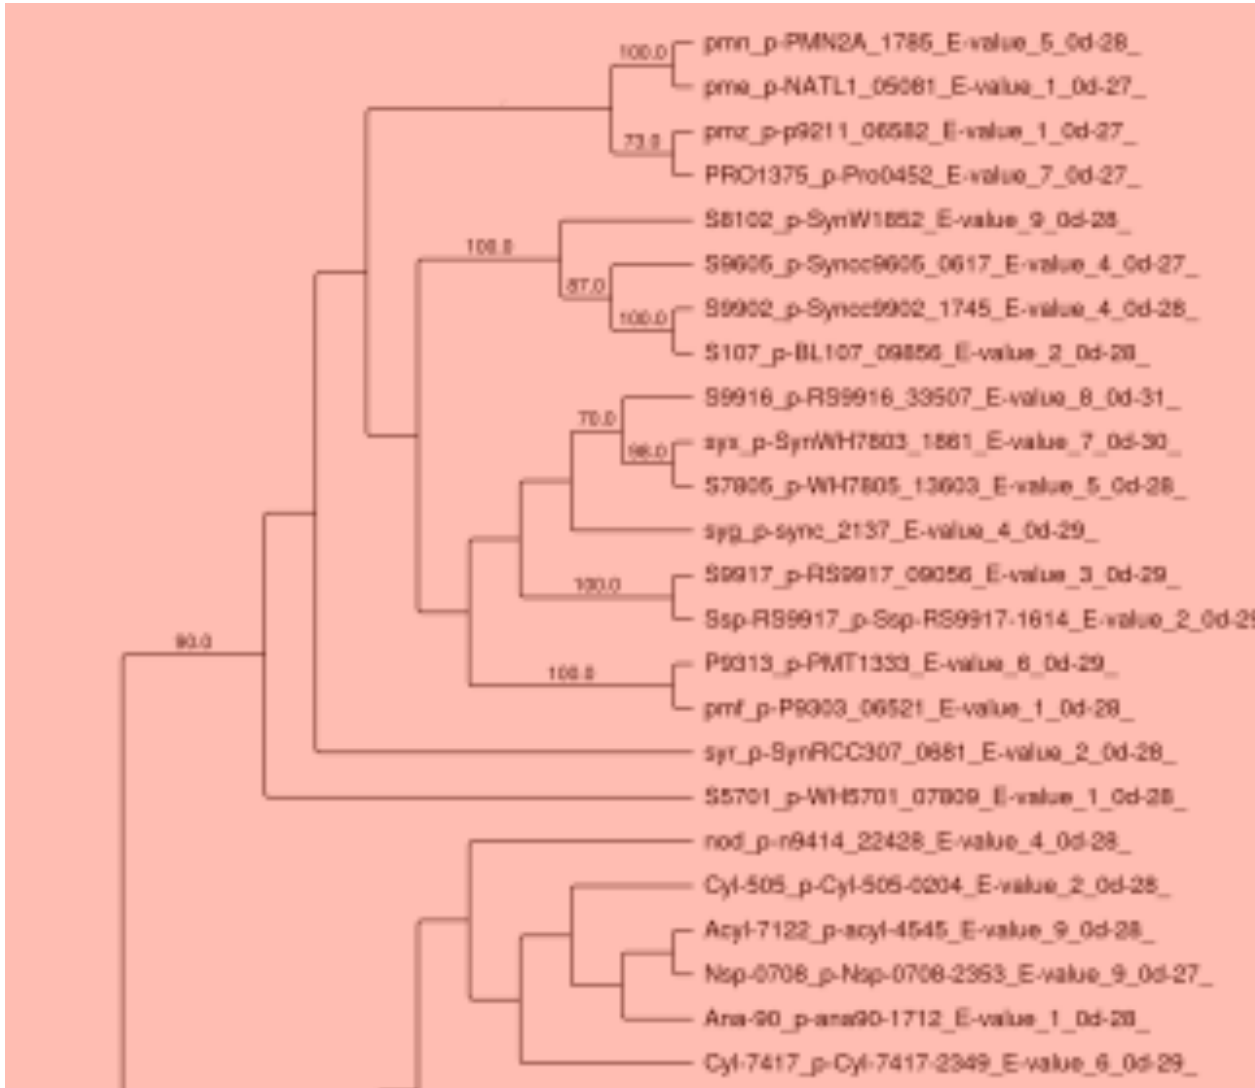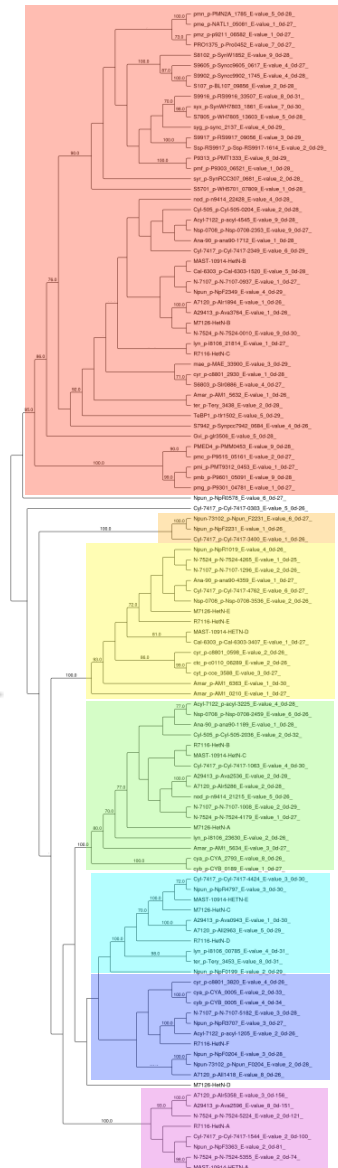

g  
f  
e  
d  
c  
b  
a

g



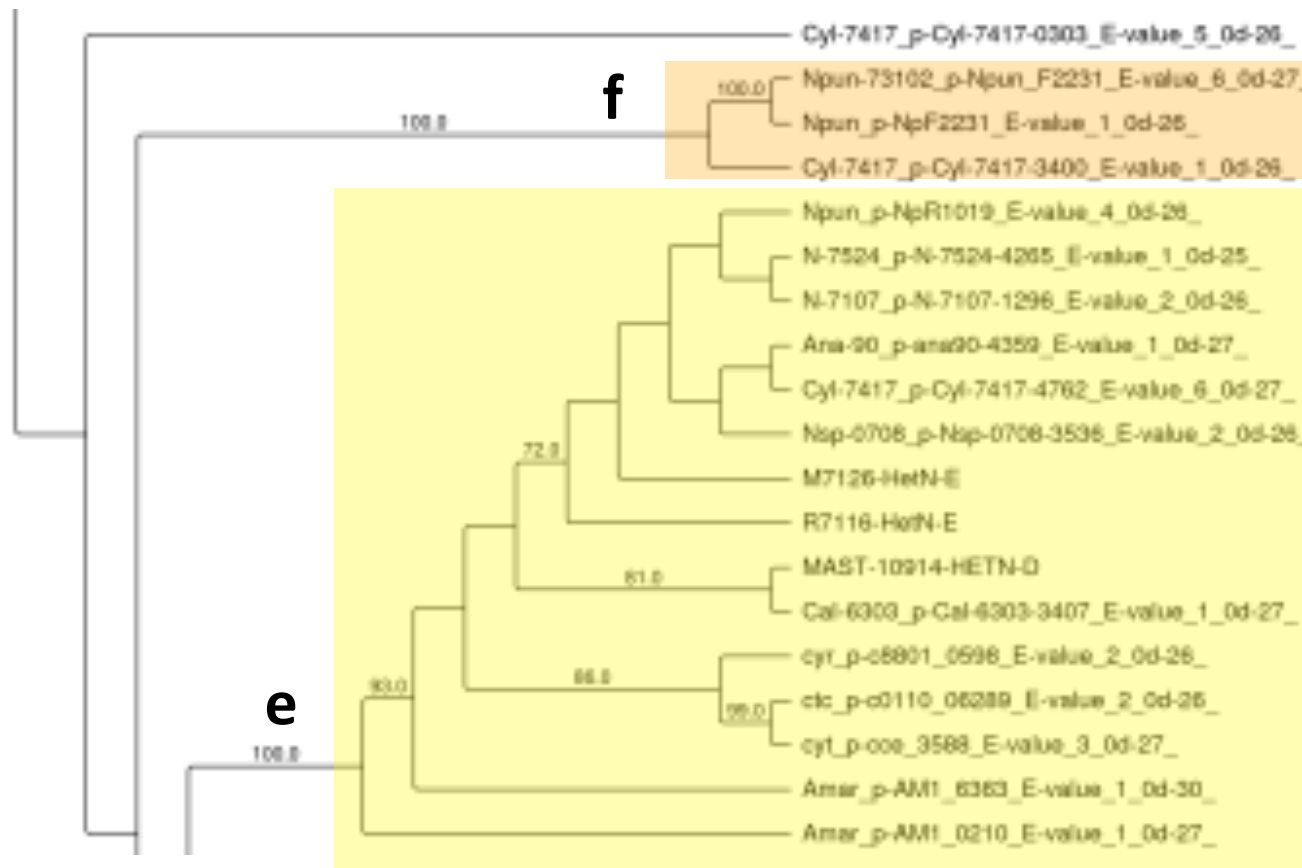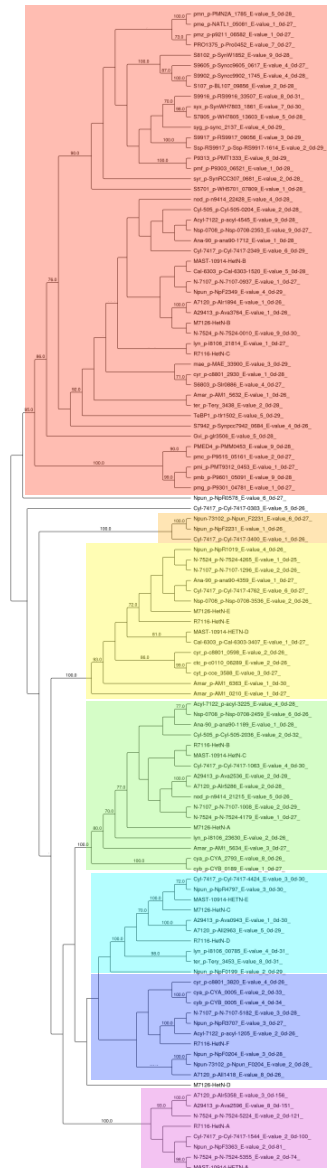



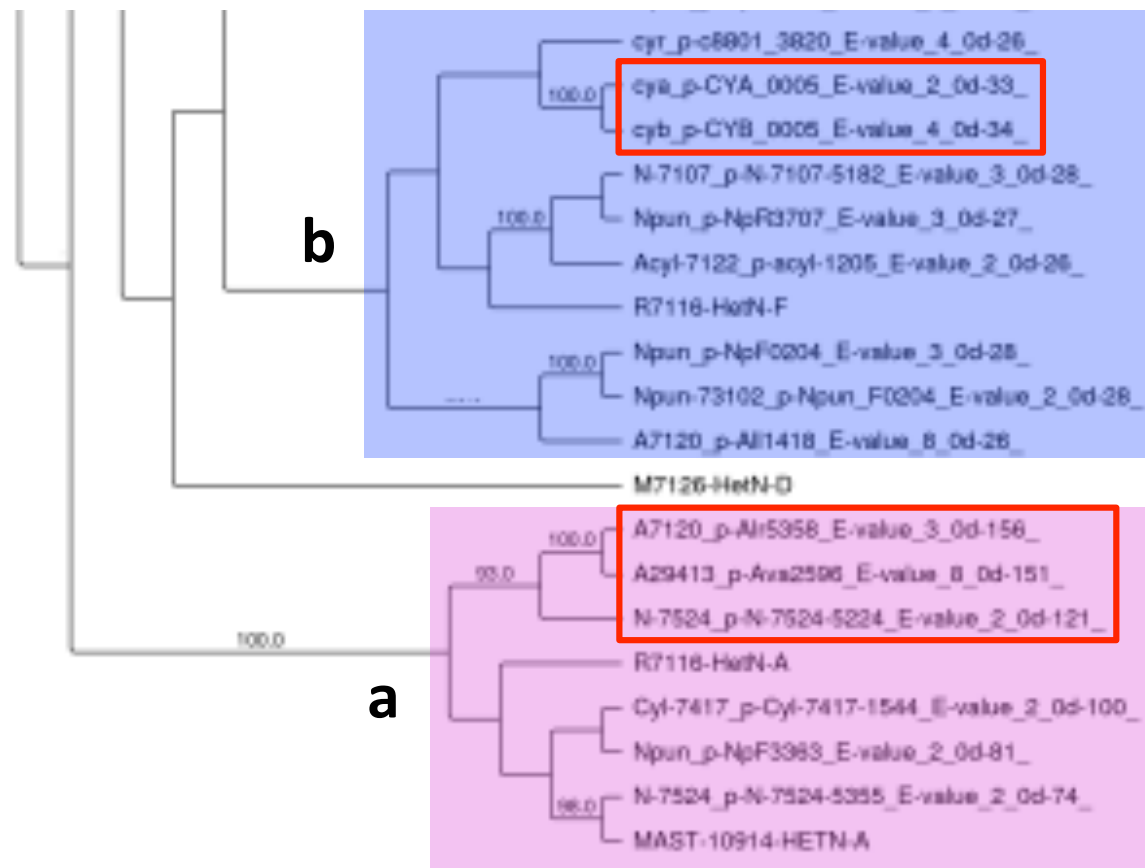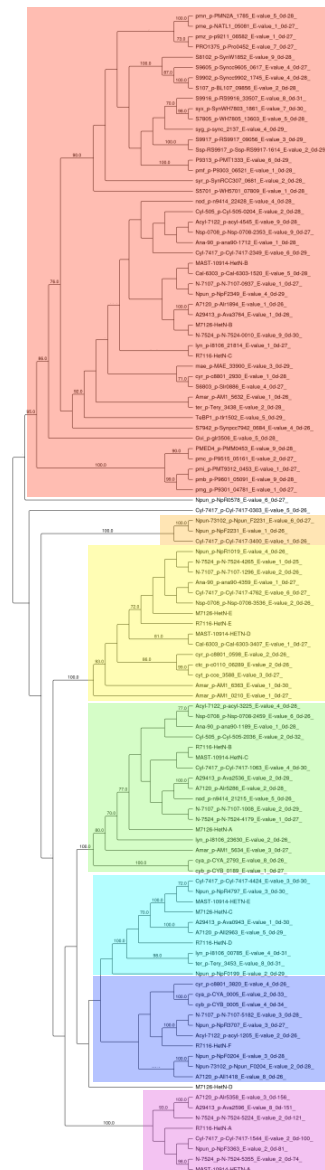

**Supplemental Fig. 2: Phylogeny of HetN-like proteins.** A neighbor-joining tree was made by Phylip from the alignment shown in Suppl. Fig. 1, with 100 bootstrap trials. Bootstrap values of at least 70 are shown. Names consist of an abbreviation of the organism (see Suppl. Table 1), a gene name, and the E-value of a Blast using HetN as the query. Red boxes highlight the proteins bearing the RGSGR motif.



## Supplemental Figure 3: Phylogeny of HetN-like proteins

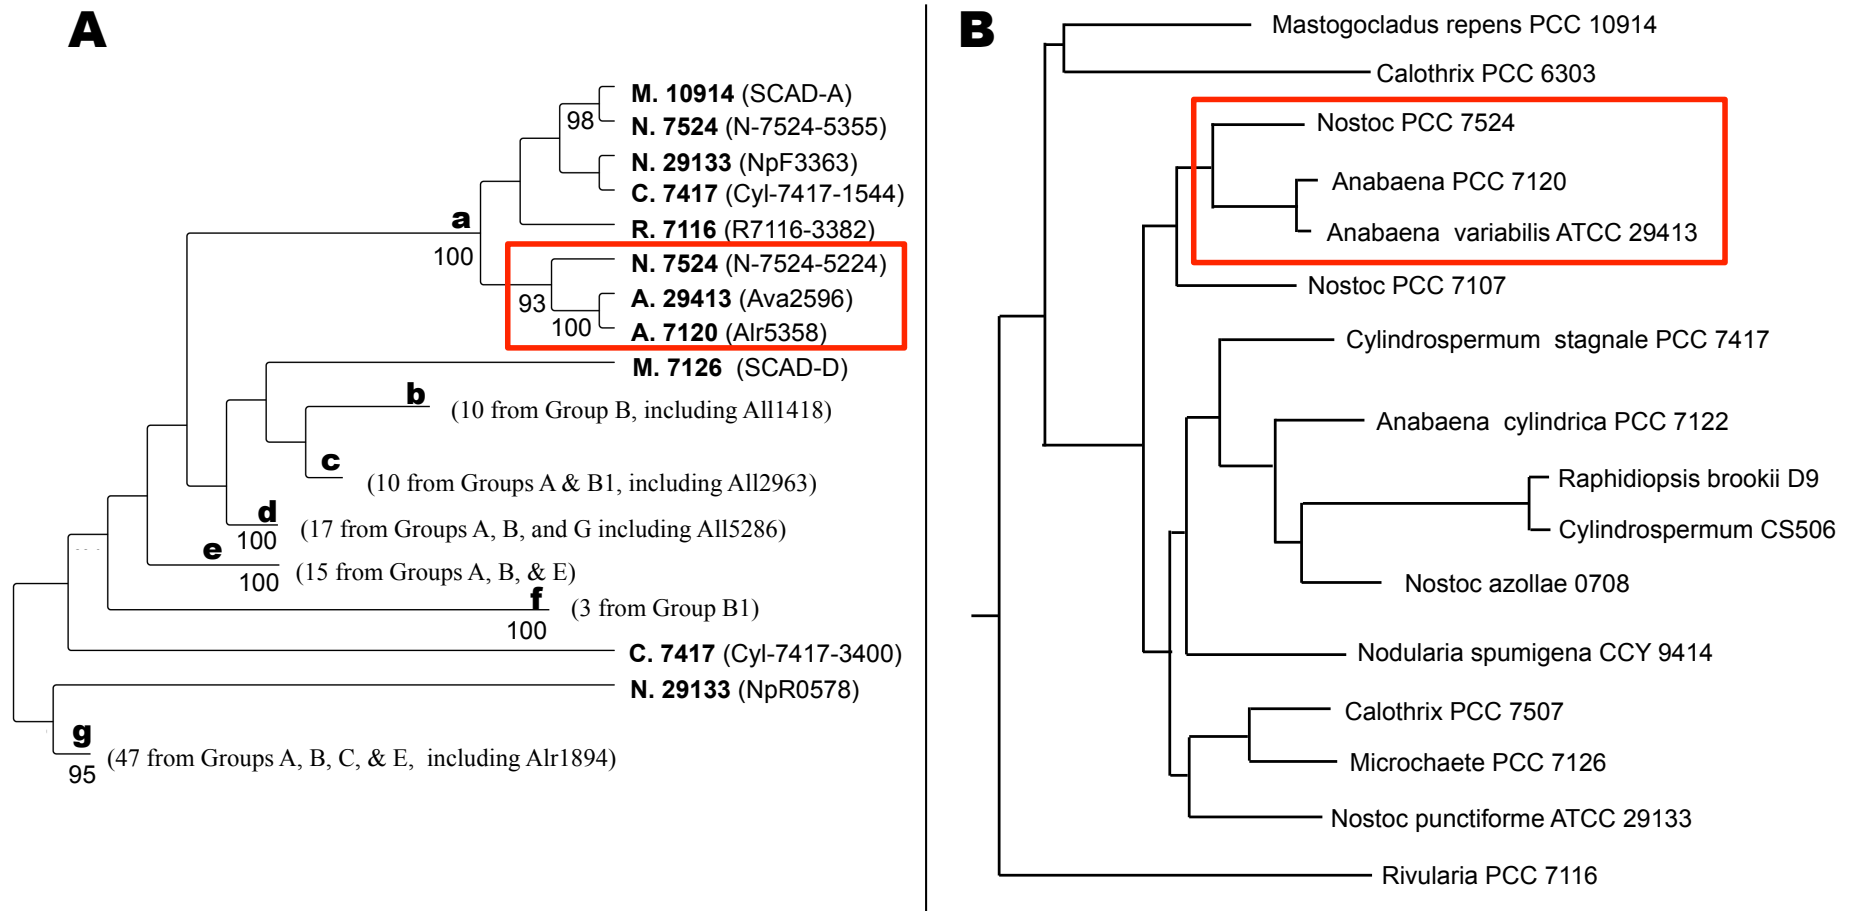

**Supplemental Fig. 3. Phylogeny of HetN-like proteins.** (A) Neighbor-joining tree of 111 cyanobacterial proteins similar to HetN, with E-values better than  $10^{-25}$ . The name of the organism is shown in bold and the name of the protein in parentheses. Clades have been collapsed to save space, except for the clade containing HetN (Alr5358) from Anabaena sp. strain PCC 7120. Bold lower case letters indicate the group, as defined by this tree. Groups with upper case letters refer to those defined by the organismal tree of Shih et al. (35). Numbers indicate bootstrap value for 100 trials. Red box surrounds proteins containing ERGSGR residues. The entire phylogeny is shown in Supplemental Fig. 1. (B) Organismal tree adapted from (35), showing the phylogenetic relationships amongst all the heterocyst-forming cyanobacteria used in this study. The red box surrounds the three cyanobacteria with HetN-like proteins containing ERGSGR residues.

## Supplemental Figure 4: Genetic context near genes encoding HetN-like proteins

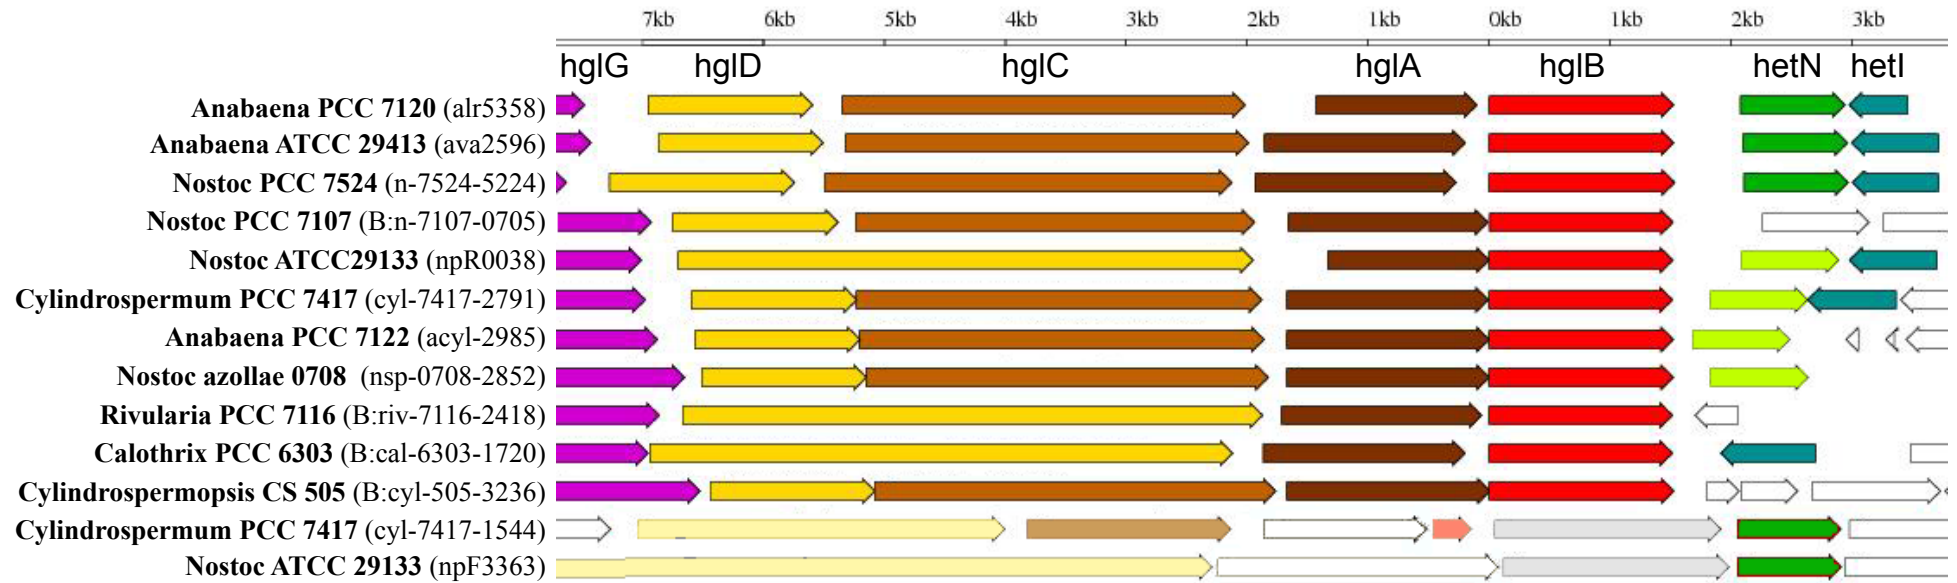

**Supplemental Figure 4. Genetic context near genes encoding HetN-like proteins.** Genes represented in the same color are orthologous to a gene shown from *Anabaena* sp. strain PCC 7120, where two proteins are defined as orthologs if they are the best Blast hit of each other in their respective organisms, with E-values better than  $10^{-10}$ . Proteins with dimmer colors are similar but not orthologous to *Anabaena* proteins. The name of the organism is shown in bold and the name of the *hetN*-like gene is given in parenthesis. If the name is preceded by "B:", then it is the name of the *hglB*-like gene that is given.

**Supplemental Table 1: Genomes used in analysis of HetN-like proteins**

| <b>Cyanobacterium</b>                                             | <b>Nicknames/Aliases</b> | <b>Shih Group<sup>a</sup></b> | <b>Description<sup>b</sup></b>   | <b>Genome-size</b> | <b>Contigs/Replicons</b> |
|-------------------------------------------------------------------|--------------------------|-------------------------------|----------------------------------|--------------------|--------------------------|
| <i>Acaryochloris marina</i> MBIC 11017                            | Amar                     | E                             | Unicellular                      | 8361599            | 10                       |
| <i>Anabaena cylindrica</i> PCC 7122                               | Acyl-7122                | B1                            | Linear, spaced heterocysts       | 7063285            | 7                        |
| <i>Anabaena</i> sp 90                                             | Ana-90                   |                               | Linear; spaced heterocysts?      | 5305675            | 5                        |
| <i>Anabaena</i> sp PCC 7120                                       | A7120                    | B1                            | Linear; spaced heterocysts       | 7211789            | 7                        |
| <i>Anabaena variabilis</i> ATCC 29413                             | A29413                   | B1                            | Linear; spaced heterocysts       | 7105752            | 5                        |
| <i>Calothrix</i> PCC 6303                                         | Cal-6303                 | B1                            | Linear; spaced/basal heterocysts | 6960392            | 4                        |
| <i>Cyanothece</i> CCY0110                                         | ctc                      |                               | Unicellular                      | 5880532            | 163                      |
| <i>Cyanothece</i> sp ATCC 51142                                   | cyt                      | B2                            | Unicellular                      | 5460377            | 6                        |
| <i>Cyanothece</i> sp PCC 8801                                     | cyr                      | B2                            | Unicellular                      | 4575961            | 29                       |
| <i>Cylindrospermopsis raciborskii</i> CS 505                      | Cyl-505                  | B1                            | Linear; terminal heterocysts     | 3879030            | 93                       |
| <i>Cylindrospermum stagnale</i> PCC7417                           | Cyl-7417, C.7417         | B1                            | Linear; terminal heterocysts     | 7610589            | 4                        |
| <i>Gloeobacter violaceus</i> PCC 7421                             | gvi                      |                               | Unicellular                      | 4659019            | 1                        |
| <i>Lyngbya</i> sp PCC 8106                                        | Lyn, CCY 9616            | A                             | Filamentous                      | 7037511            | 110                      |
| <i>Mastigocladopsis repens</i> PCC 10914                          | MAST-109014, M.10914     | B1                            | branched; spaced heterocysts     | 6070411            | 1                        |
| <i>Microchaete</i> sp PCC 7126                                    | M7126                    | B1                            | Linear; spaced/basal heterocysts | 5207209            | 1                        |
| <i>Microcystis aeruginosa</i> NIES 843                            | mae                      | B2                            | Unicellular                      | 5842795            | 1                        |
| <i>Nodularia spumigena</i> CCY 9414                               | nod                      | B1                            | Linear; spaced heterocysts       | 5316258            | 204                      |
| <i>Nostoc azollae</i> 0708                                        | Nsp-0708                 | B1                            | Linear; spaced heterocysts       | 5486145            | 3                        |
| <i>Nostoc punctiforme</i> PCC 73102                               | Npun, N.29133            | B1                            | Linear; spaced heterocysts       | 9059191            | 6                        |
| <i>Nostoc</i> sp PCC 7107                                         | N-7107                   | B1                            | Linear; spaced heterocysts       | 6329823            | 1                        |
| <i>Nostoc</i> sp PCC 7524                                         | N-7524, N.7524           | B1                            | Linear; spaced heterocysts       | 6718869            | 3                        |
| <i>Prochlorococcus marinus</i> str MIT 9211                       | pmz                      | C1                            | Marine picoplankton              | 1839003            | 114                      |
| <i>Prochlorococcus marinus</i> str MIT 9312                       | pmi                      | C1                            | Marine picoplankton              | 1709204            | 1                        |
| <i>Prochlorococcus marinus</i> str MIT 9313                       | P9313                    | C1                            | Marine picoplankton              | 2410873            | 1                        |
| <i>Prochlorococcus marinus</i> str NATL1A                         | pme                      | C1                            | Marine picoplankton              | 1864731            | 1                        |
| <i>Prochlorococcus marinus</i> str NATL2A                         | pmn                      | C1                            | Marine picoplankton              | 1842899            | 1                        |
| <i>Prochlorococcus marinus</i> subsp <i>marinus</i> str CCMP1375  | PRO1375, ss120           | C1                            | Marine picoplankton              | 1751080            | 1                        |
| <i>Prochlorococcus marinus</i> subsp <i>pastoris</i> str CCMP1986 | PMED4                    | C1                            | Marine picoplankton              | 1657990            | 1                        |
| <i>prochlorococcus marinus</i> as9601                             | pmb                      | C1                            | Marine picoplankton              | 1669886            | 1                        |
| <i>Prochlorococcus marinus</i> mit9301                            | pmg                      | C1                            | Marine picoplankton              | 1641879            | 1                        |
| <i>Prochlorococcus marinus</i> mit9303                            | pmf                      | C1                            | Marine picoplankton              | 2682675            | 1                        |
| <i>Prochlorococcus marinus</i> mit9515                            | pmc                      | C1                            | Marine picoplankton              | 1704176            | 1                        |
| <i>Rivularia</i> PCC 7116                                         | R7116                    | B1                            | Linear; spaced/basal heterocysts | 8728773            | 3                        |

|                                    |            |    |                     |         |   |
|------------------------------------|------------|----|---------------------|---------|---|
| Synechococcus BL107                | S107       | C1 | Marine picoplankton | 2285034 | 1 |
| Synechococcus CC9311               | syg        | C1 | Marine picoplankton | 2606748 | 1 |
| Synechococcus elongatus PCC 7942   | S7942      | C2 | Unicellular         | 2750104 | 3 |
| Synechococcus RCC307               | syr        | C1 | Marine picoplankton | 2224914 | 1 |
| Synechococcus sp CC9605            | S9605      | C1 | Marine picoplankton | 2510659 | 1 |
| Synechococcus sp CC9902            | S9902      | C1 | Marine picoplankton | 2234828 | 1 |
| Synechococcus sp JA 2 3B           | cyb        | G  | Unicellular         | 3046682 | 1 |
| Synechococcus sp JA 3 3Ab          | cya        | G  | Unicellular         | 2932766 | 1 |
| Synechococcus sp RS9916            | S9916      | C1 | Marine picoplankton | 2664873 | 1 |
| Synechococcus sp RS9917            | Ssp-RS9917 | C1 | Marine picoplankton | 2584918 | 1 |
| Synechococcus sp WH 5701           | S5701      | C1 | Marine picoplankton | 2860463 | 1 |
| Synechococcus sp WH 7803           | syx        | C1 | Marine picoplankton | 2366980 | 1 |
| Synechococcus sp WH 7805           | S7805      | C1 | Marine picoplankton | 2621166 | 1 |
| Synechococcus sp WH 8102           | S8102      | C1 | Marine picoplankton | 2434428 | 1 |
| Synechocystis sp PCC 6803          | S6803      | B2 | Unicellular         | 3956956 | 8 |
| Thermosynechococcus elongatus BP 1 | TeBP1      | D  | Unicellular         | 2593857 | 1 |
| Trichodesmium erythraeum IMS101    | ter        | A  | Filamentous         | 7750108 | 1 |

<sup>a</sup> Groups are defined by Shih et al (2013)

<sup>b</sup> Description refers to the overall morphology of the cyanobacterium – either unicellular, linear filamentous, or branched filamentous – and the positions of heterocysts (if present).
